# Supplementary material for: Effective asymmetric vinylogous Mannich reaction of isatin imines with α,α-dicyanoolefins in the presence of a simple chiral amide phosphonium bifunctional phase transfer catalyst
Source: Royal Society of Chemistry journal article supplement (doi:10.1039/c6qo00546b), 2016-10-20

# Effective Asymmetric Vinylogous Mannich Reaction of Isatin Imines with $\alpha,\alpha$ -Dicyanoolefins in the Presence of a Simple Chiral Amide Phosponium Bifunctional Phase Transfer Catalyst

Cang Cheng,<sup>a</sup> Xuehe Lu,<sup>a</sup> Luo Ge,<sup>a</sup> Jie Chen,<sup>a</sup> Weiguo Cao,<sup>\*a</sup> Xiaoyu Wu,<sup>\*a,b</sup> and  
Gang Zhao

<sup>a</sup> Department of Chemistry, Shanghai University, 99 Shangda Rd, Shanghai 200444, China; <sup>b</sup> Key  
Laboratory of Synthetic Chemistry of Natural Substances, Shanghai Institute of Organic  
Chemistry, Chinese Academy of Sciences, 354 Fenglin Lu, Shanghai 200032, China

e-mail: wgcao@shu.edu.cn; wuxy@shu.edu.cn

|                                                                                       |        |
|---------------------------------------------------------------------------------------|--------|
| <sup>1</sup> H NMR, <sup>13</sup> C NMR and HPLC spectra of 3aa-3al and 3ba-3la-----  | S2-49  |
| <sup>1</sup> H NMR, <sup>13</sup> C NMR and HPLC spectra of 4a, 4b, 3ap and 4c-----   | S50-57 |
| <sup>1</sup> H NMR, <sup>13</sup> C NMR and HPLC spectra of 5-----                    | S58-81 |
| <sup>1</sup> H NMR and <sup>13</sup> C NMR spectra of phosponium salt catalysts ----- | S82-87 |

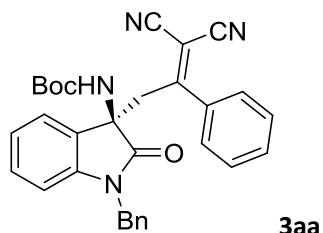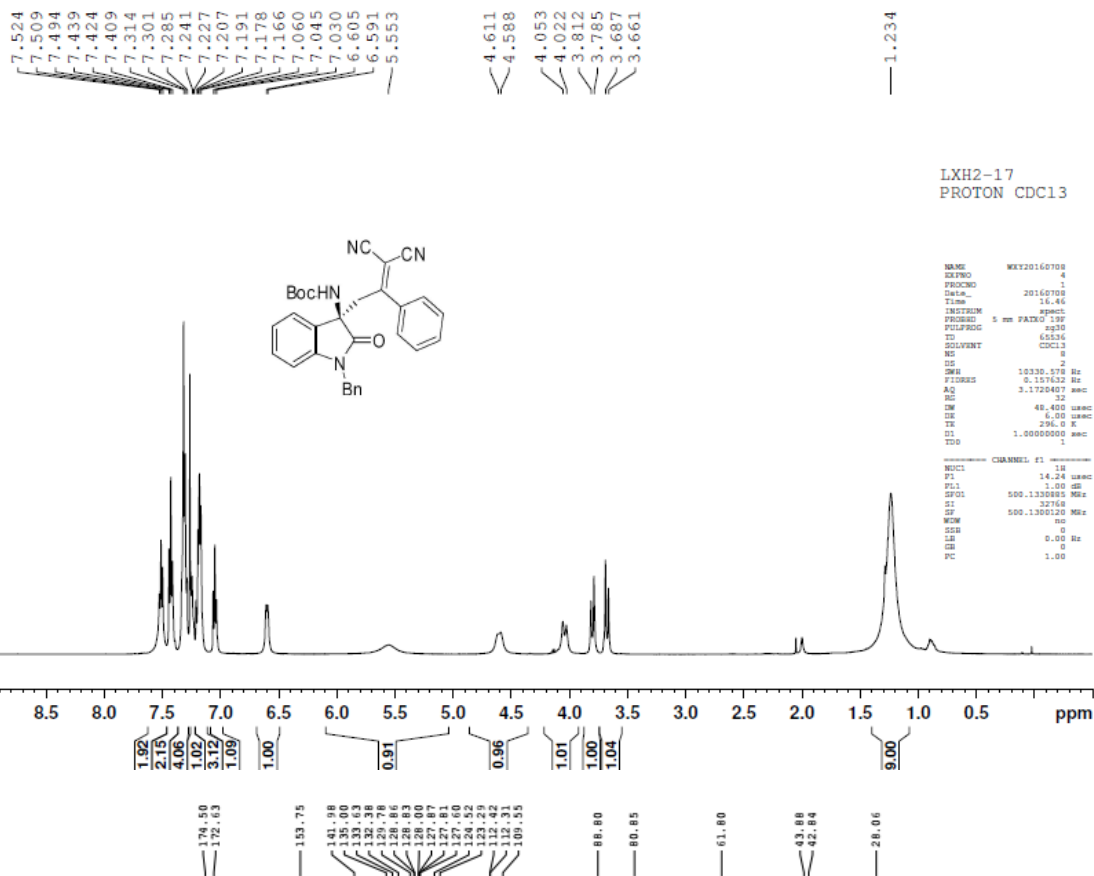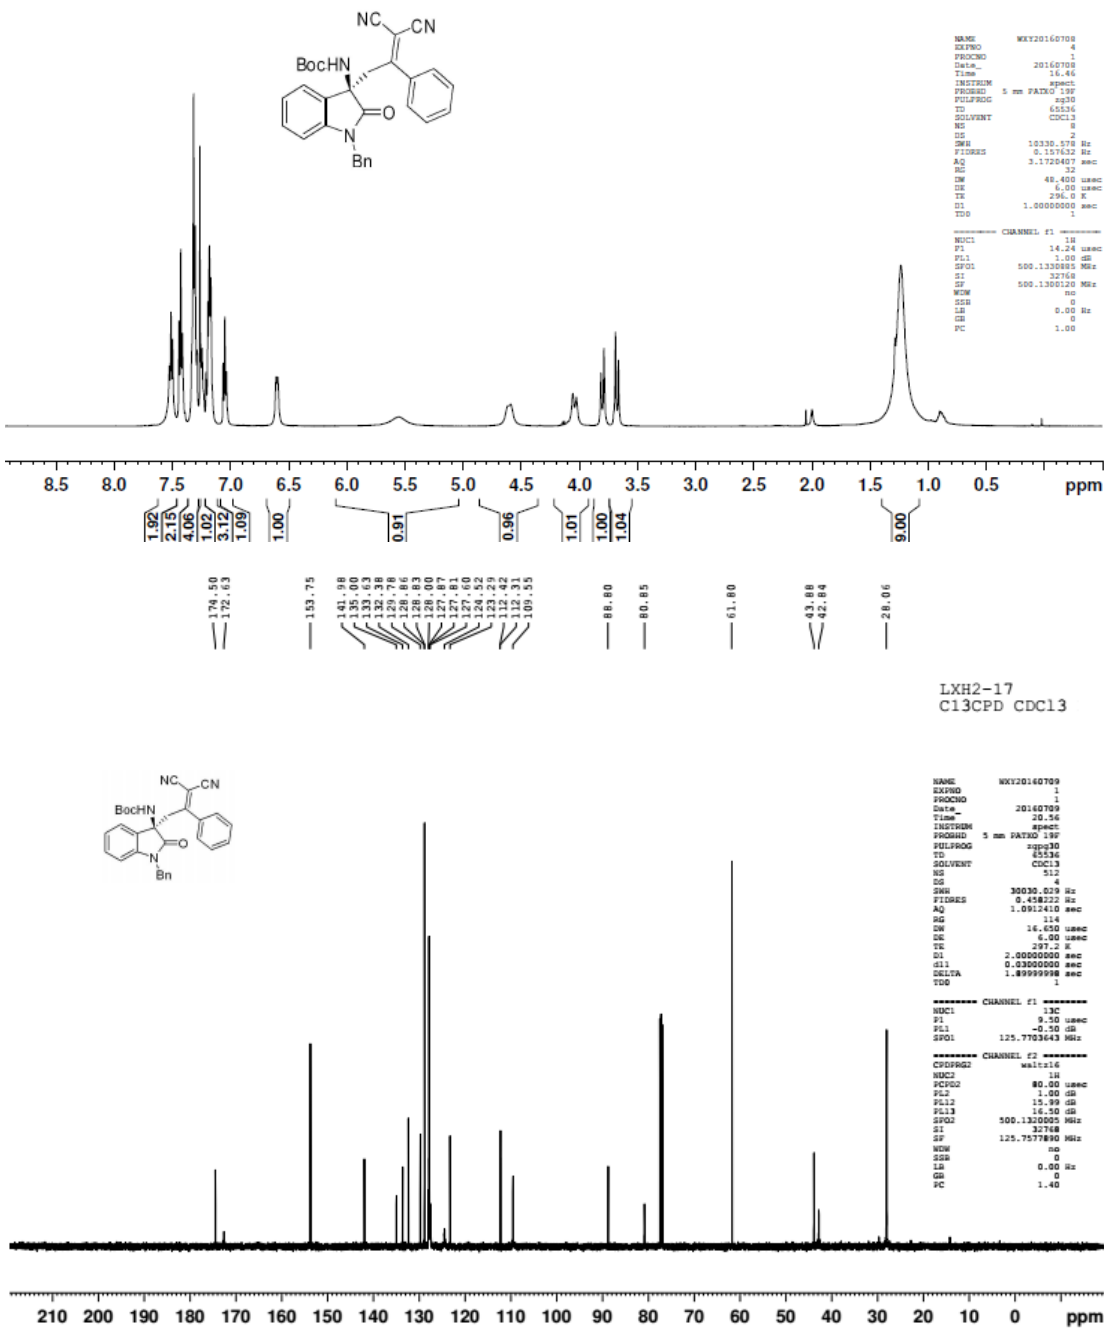

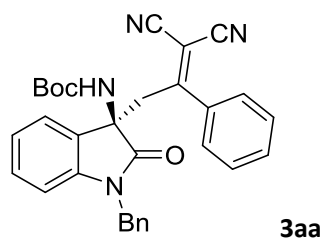

<chromatogram>

mV

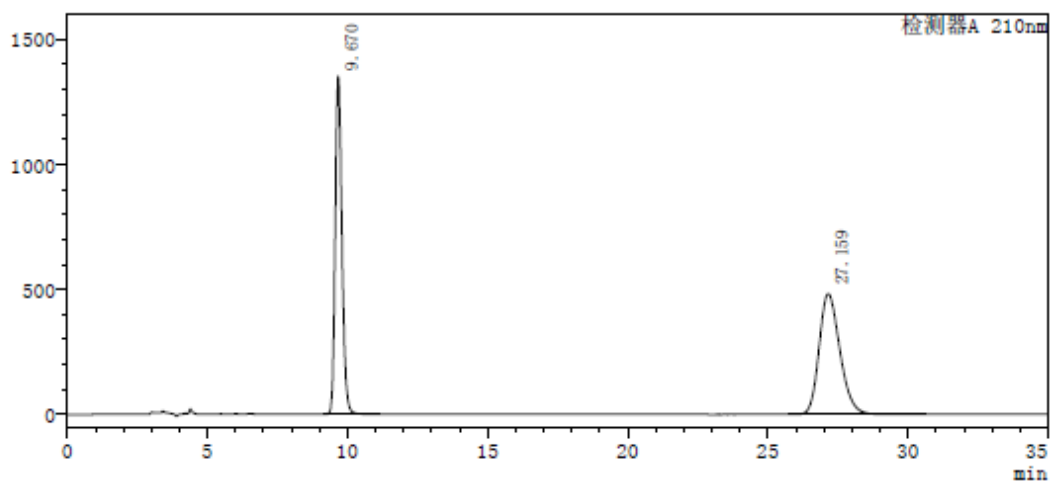

<Peak table>

检测器A 210nm

| Peak# | Ret. Time | Height  | Area     | Area%   |
|-------|-----------|---------|----------|---------|
| 1     | 9.670     | 1350297 | 22688192 | 47.666  |
| 2     | 27.159    | 483039  | 24909627 | 52.334  |
| 总计    |           | 1833337 | 47597819 | 100.000 |

<chromatogram>

mV

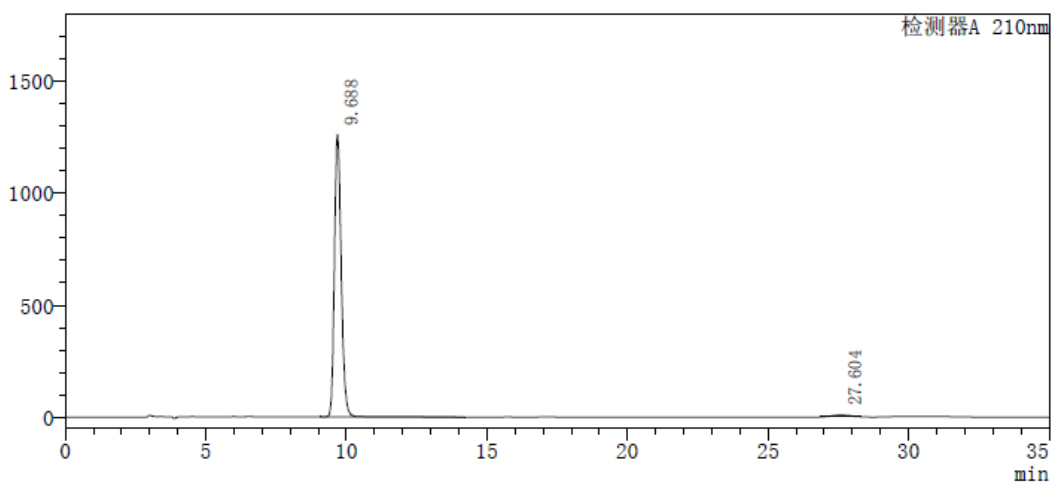

<Peak table>

检测器A 210nm

| Peak# | Ret. Time | Height  | Area     | Area%   |
|-------|-----------|---------|----------|---------|
| 1     | 9.688     | 1261615 | 21281578 | 98.194  |
| 2     | 27.604    | 8716    | 391377   | 1.806   |
| 总计    |           | 1270331 | 21672955 | 100.000 |



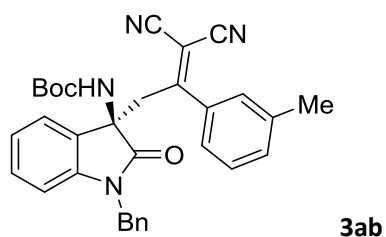

<chromatogram>

mV

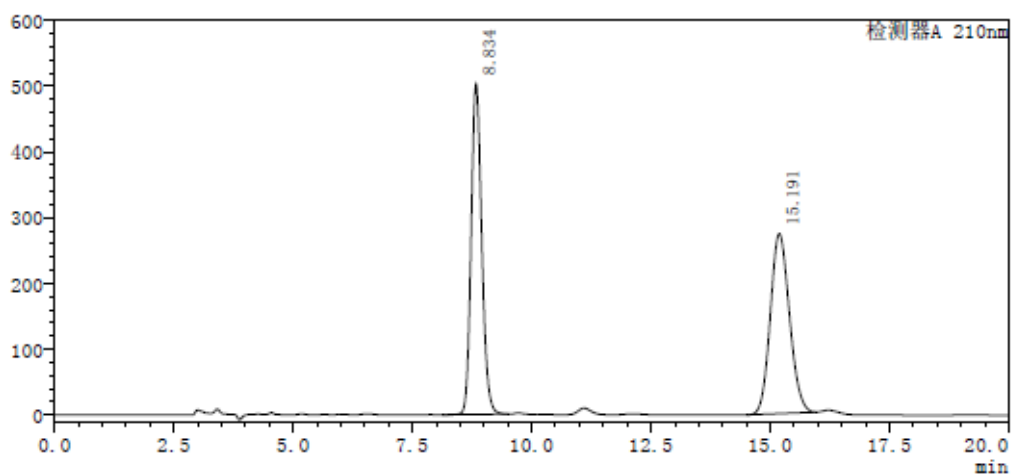

<Peak table>

检测器A 210nm

| Peak# | Ret. Time | Height | Area     | Area%   |
|-------|-----------|--------|----------|---------|
| 1     | 8.834     | 502715 | 7777849  | 50.429  |
| 2     | 15.191    | 273623 | 7645378  | 49.571  |
| 总计    |           | 776339 | 15423228 | 100.000 |

<chromatogram>

mV

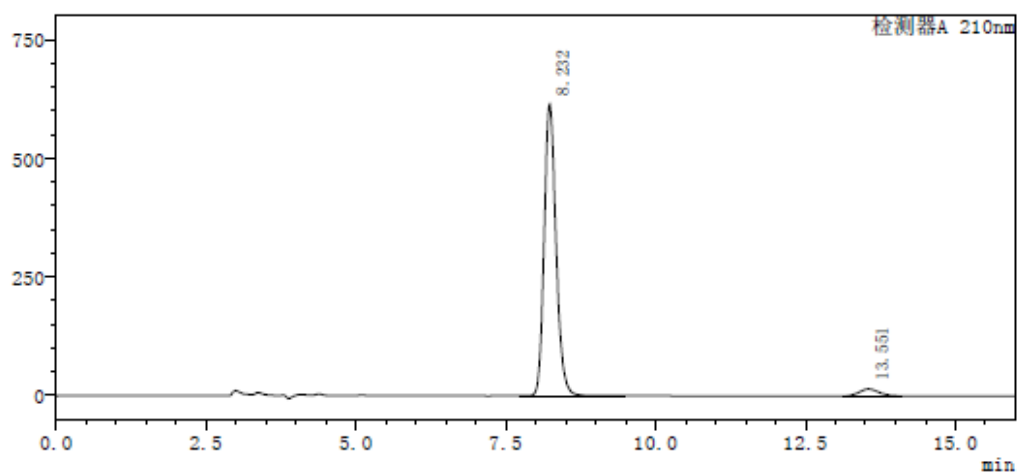

<Peak table>

检测器A 210nm

| Peak# | Ret. Time | Height | Area    | Area%   |
|-------|-----------|--------|---------|---------|
| 1     | 8.232     | 614891 | 8488237 | 96.303  |
| 2     | 13.551    | 14509  | 325879  | 3.697   |
| 总计    |           | 629401 | 8814116 | 100.000 |

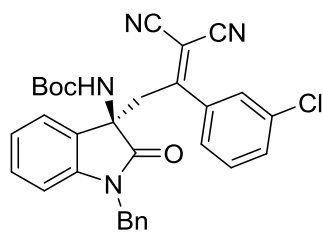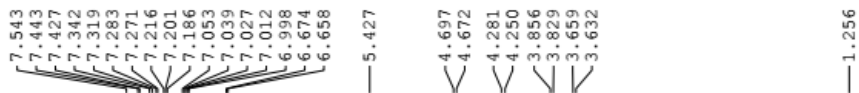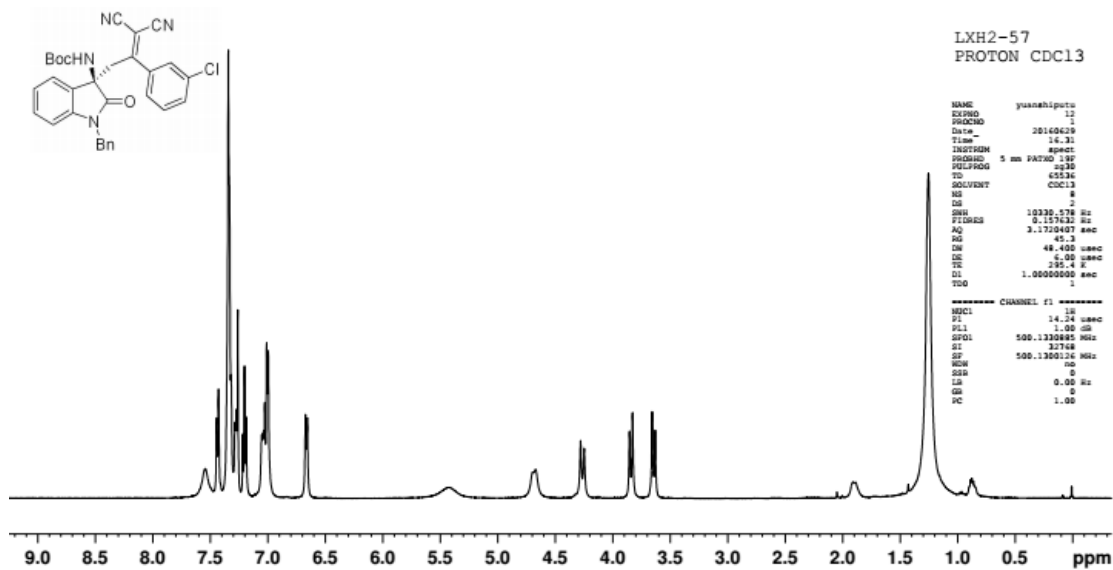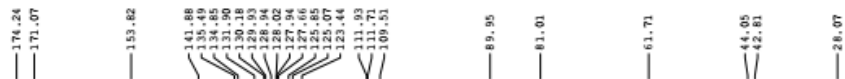

LXH2-57  
C13CPD CDCl3

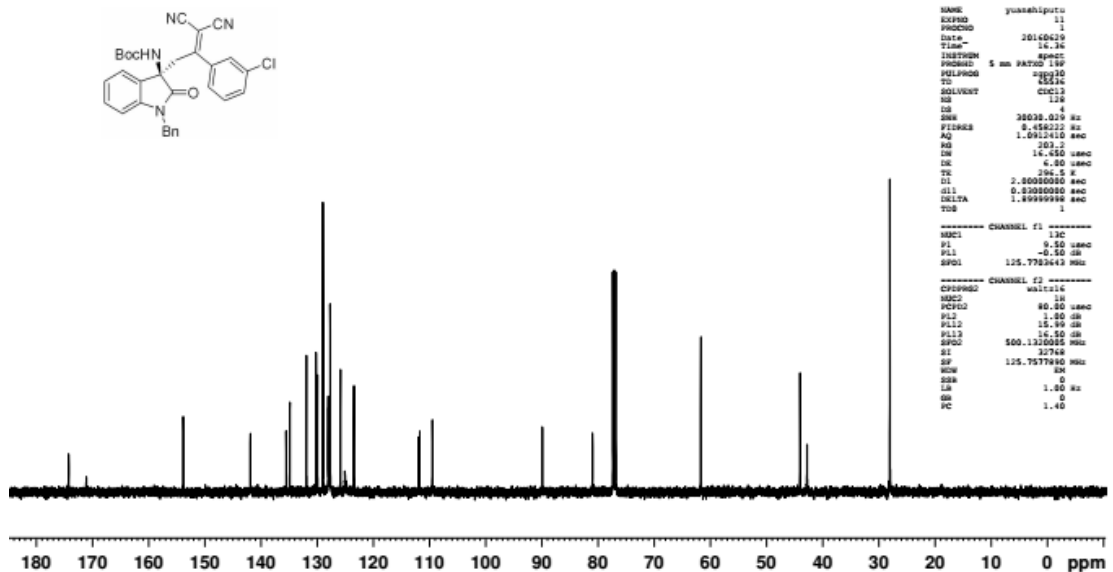

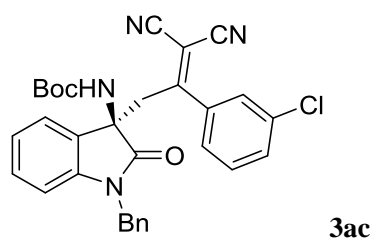

<chromatogram>

mV

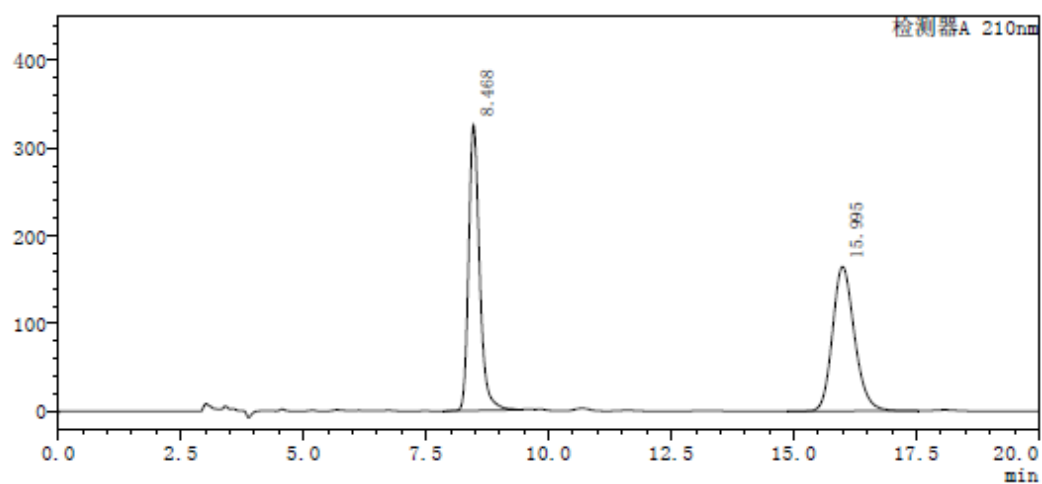

<Peak table>

检测器A 210nm

| Peak# | Ret. Time | Height | Area     | Area%   |
|-------|-----------|--------|----------|---------|
| 1     | 8.468     | 325465 | 5089739  | 49.806  |
| 2     | 15.995    | 164588 | 5129298  | 50.194  |
| 总计    |           | 490053 | 10219038 | 100.000 |

<chromatogram>

mV

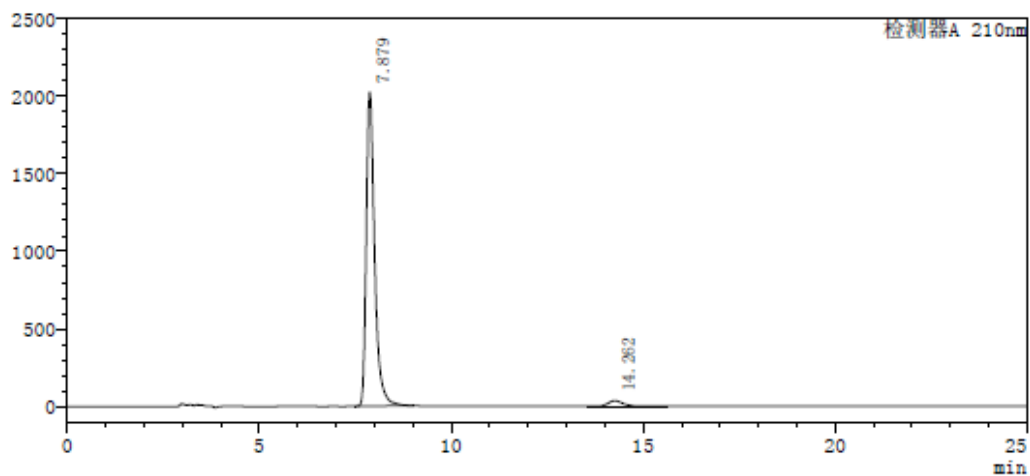

<Peak table>

检测器A 210nm

| Peak# | Ret. Time | Height  | Area     | Area%   |
|-------|-----------|---------|----------|---------|
| 1     | 7.879     | 2023405 | 30719861 | 97.049  |
| 2     | 14.262    | 35745   | 934087   | 2.951   |
| 总计    |           | 2059150 | 31653948 | 100.000 |

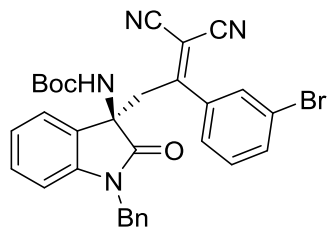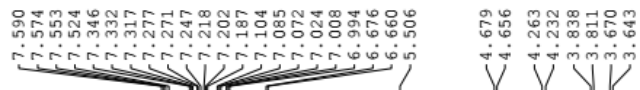

LXH2-52  
PROTON CDC13

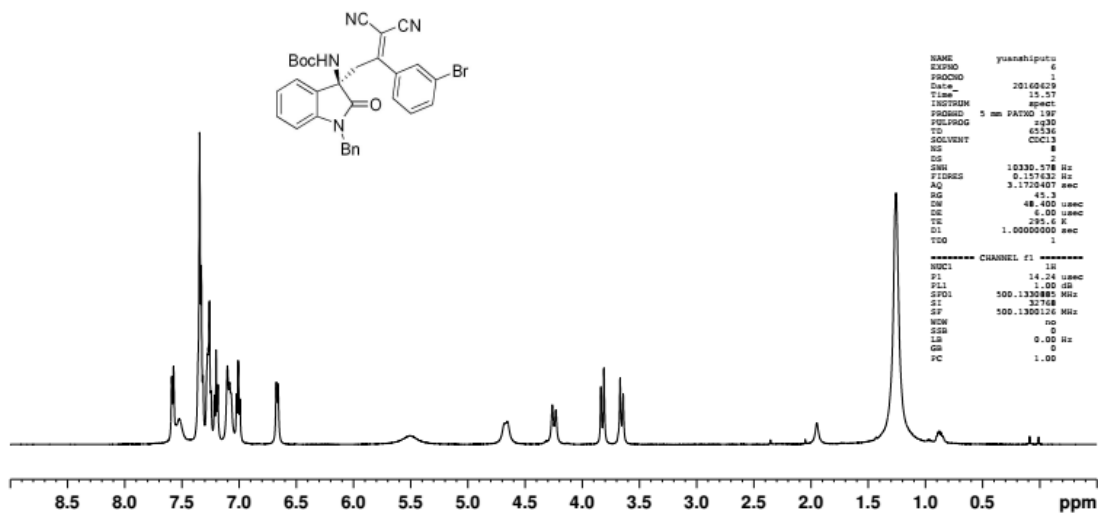

```

NAME      yusanhiputu
EXPNO     6
PROCNO    1
Date_     20160629
Time      15:57
INSTRUM   spect
PROBHD    5 mm PACTO 19F
PULPROG   zgpg30
TD         65536
SOLVENT   CDCl3
NS         8
DS         2
SFO1      10330.378 Hz
FIDRES    0.157632 Hz
AQ         3.1702407 sec
RG         45.3
SWH        48.460 usec
DE         6.00 usec
TE         295.6 K
D1         1.00000000 sec
TD0        1

===== CHANNEL f1 =====
NUC1       13C
P1         14.24 usec
PL1        1.00 dB
SFO1      500.1320025 MHz
SI         32768
SF         500.1300126 MHz
WDW        no
SSB        0
LA         0.00 Hz
GB         0
PC         1.00

```

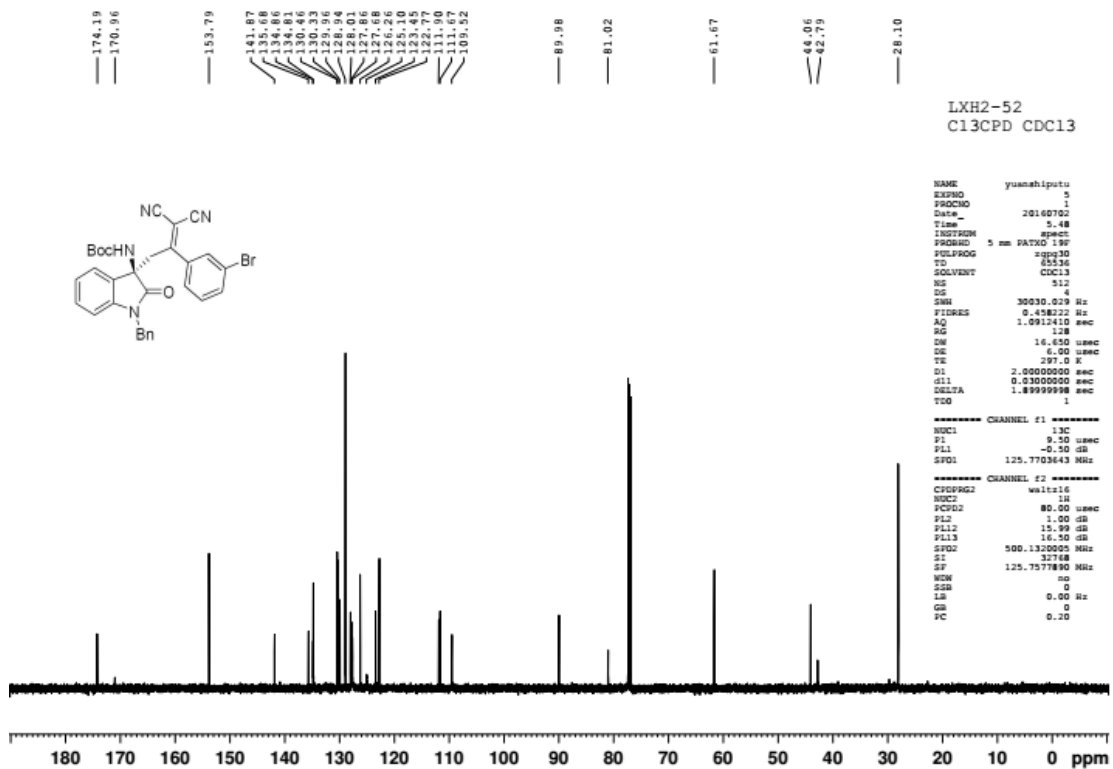

LXH2-52  
C13CPD CDC13

```

NAME      yusanhiputu
EXPNO     5
PROCNO    1
Date_     20160702
Time      5:48
INSTRUM   spect
PROBHD    5 mm PACTO 19F
PULPROG   zgpg30
TD         65536
SOLVENT   CDCl3
NS         8
DS         4
SFO1      30030.029 Hz
FIDRES    0.458222 Hz
AQ         1.0912410 sec
RG         128
SWH        16.450 usec
DE         6.00 usec
TE         297.0 K
D1         2.00000000 sec
d11        0.23000000 sec
DELTA     1.89999998 sec
TD0        1

===== CHANNEL f1 =====
NUC1       13C
P1         9.50 usec
PL1        -0.50 dB
SFO1      125.7703443 MHz

===== CHANNEL f2 =====
CPDPRG2   waltz16
NUC2       1H
PCPD2     80.00 usec
PL2        1.00 dB
PL12      15.99 dB
PL13      16.50 dB
SFO2      500.1320025 MHz
SI         32768
SF         125.7577890 MHz
WDW        no
SSB        0
LA         0.00 Hz
GB         0
PC         0.20

```



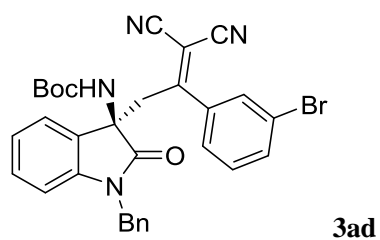

<chromatogram>

mV

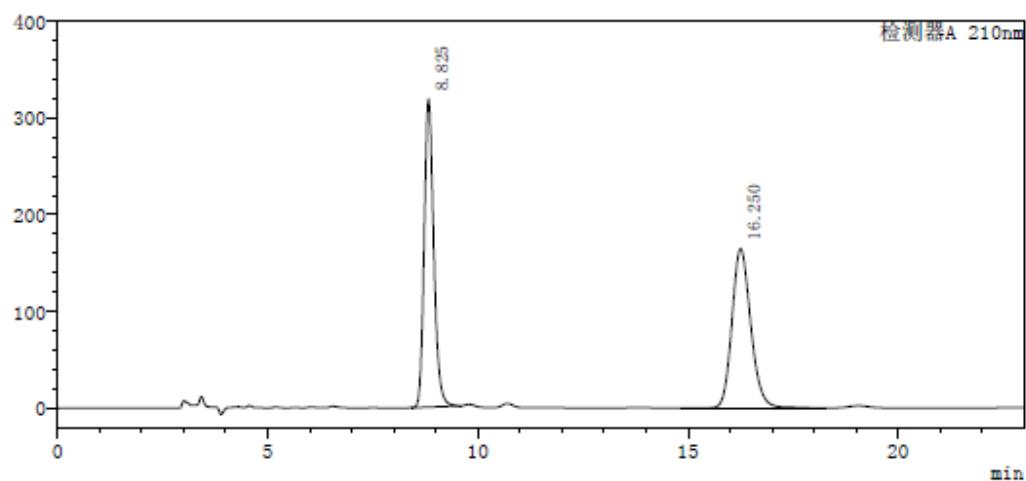

<Peak table>

检测器A 210nm

| Peak# | Ret. Time | Height | Area     | Area%   |
|-------|-----------|--------|----------|---------|
| 1     | 8.825     | 318041 | 5039609  | 49.487  |
| 2     | 16.250    | 164864 | 5144095  | 50.513  |
| 总计    |           | 482905 | 10183705 | 100.000 |

<chromatogram>

mV

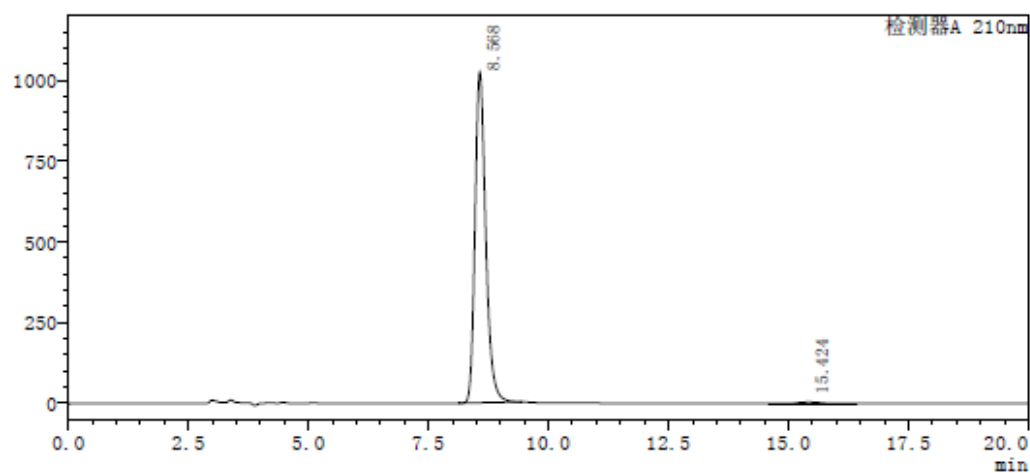

<Peak table>

检测器A 210nm

| Peak# | Ret. Time | Height  | Area     | Area%   |
|-------|-----------|---------|----------|---------|
| 1     | 8.568     | 1024197 | 15935998 | 99.345  |
| 2     | 15.424    | 3635    | 105083   | 0.655   |
| 总计    |           | 1027832 | 16041081 | 100.000 |

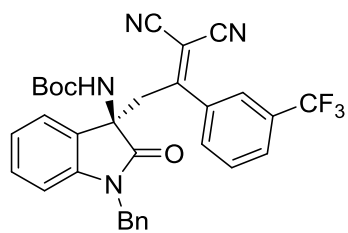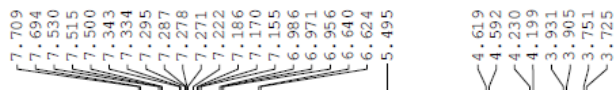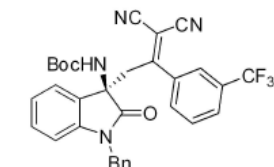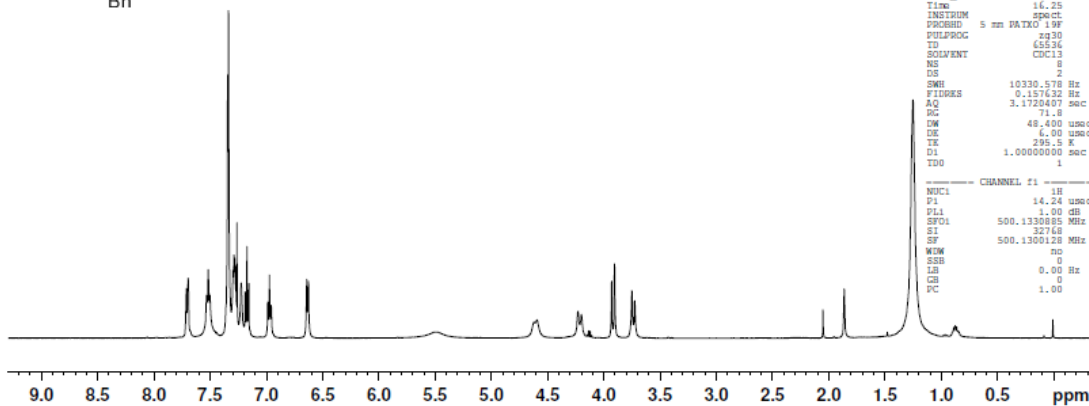

CC4-146  
PROTON CDC13

```

NAME      WXY20160701
EXPNO     4
PROCNO    1
Date_     20160701
Time      14.25
INSTRUM   spect
PROBHD    5 mm PAIXO 19F
PULPROG   zg30
TD         65536
SOLVENT   CDCl3
NS         2
DS         8
SWH        10330.578 Hz
FIDRES     0.157632 Hz
AQ         3.1720407 sec
RG         71.8
DW         48.400 usec
DE         6.00 usec
TE         295.5 K
D1         1.00000000 sec
TDO        1
----- CHANNEL f1 -----
NUC1      1H
P1         14.24 usec
PL1        1.00 dB
SFO1      500.1330885 MHz
SI         32768
SF         500.1330128 MHz
WUM        no
SSB        0
LB         0.00 Hz
GB         0
PC         1.00

```

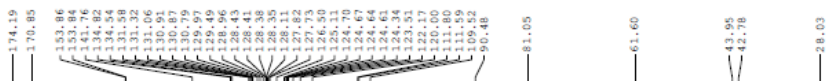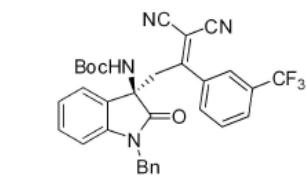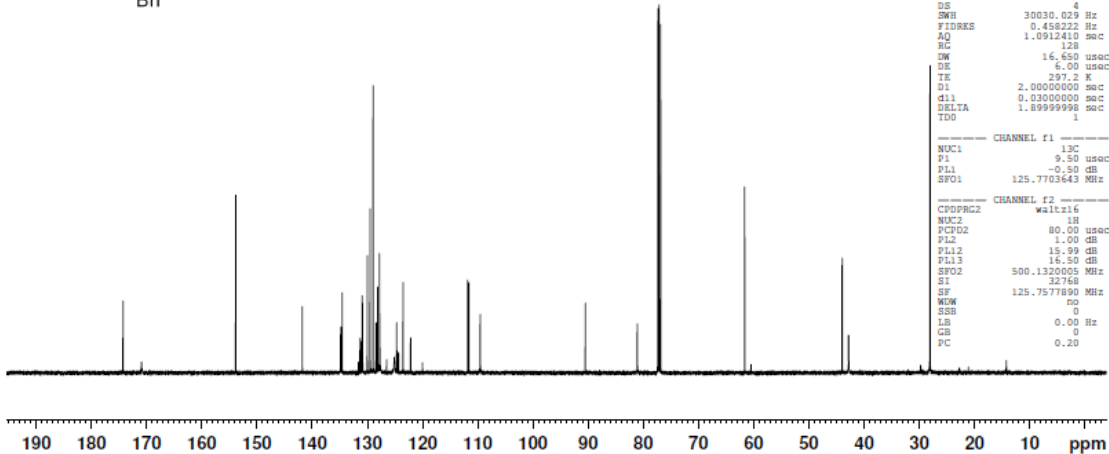

CC4-146  
C13CPD CDC13 I

```

NAME      WXY20160703
EXPNO     12
PROCNO    1
Date_     20160703
Time      11.17
INSTRUM   spect
PROBHD    5 mm PAIXO 19F
PULPROG   zgpg30
TD         65536
SOLVENT   CDCl3
NS         4
DS         8
SWH        30030.029 Hz
FIDRES     0.458222 Hz
AQ         1.0912410 sec
RG         128
DW         16.650 usec
DE         6.00 usec
TE         297.2 K
D1         2.00000000 sec
d11        0.03000000 sec
DELTA      1.89999998 sec
TDO        1
----- CHANNEL f1 -----
NUC1      13C
P1         9.50 usec
PL1        -0.50 dB
SFO1      125.7703643 MHz
----- CHANNEL f2 -----
CPDPRG2   waltz16
NUC2      1H
PCPD2     80.50 usec
PL2        1.00 dB
PL12       15.99 dB
PL13       14.50 dB
SFO2      500.1320005 MHz
SI         32768
SF         125.7577890 MHz
WUM        no
SSB        0
LB         0.00 Hz
GB         0
PC         0.20

```

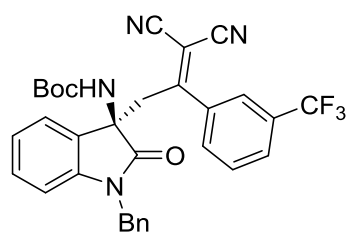

3ae

<chromatogram>

mV

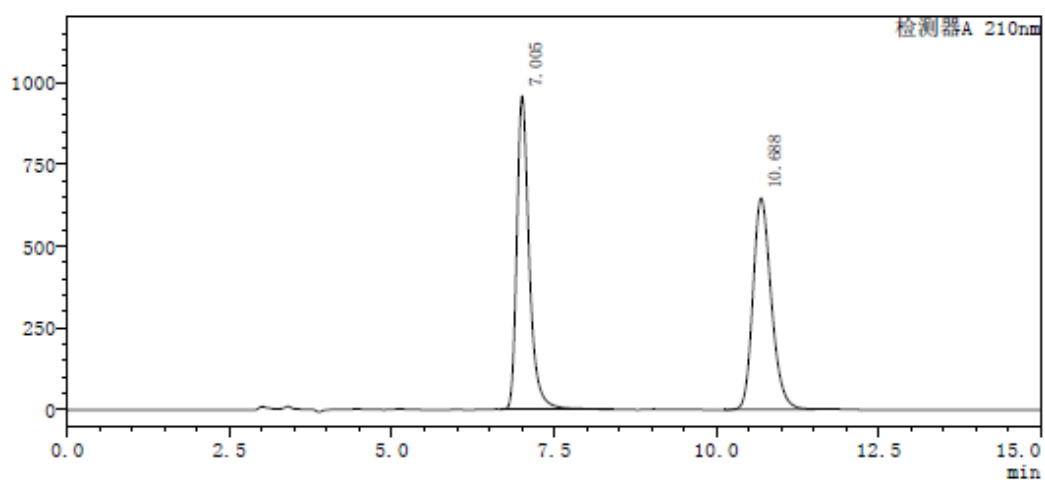

<Peak table>

检测器A 210nm

| Peak# | Ret. Time | Height  | Area     | Area%   |
|-------|-----------|---------|----------|---------|
| 1     | 7.005     | 957001  | 12713448 | 50.008  |
| 2     | 10.688    | 645537  | 12709523 | 49.992  |
| 总计    |           | 1602538 | 25422972 | 100.000 |

<chromatogram>

mV

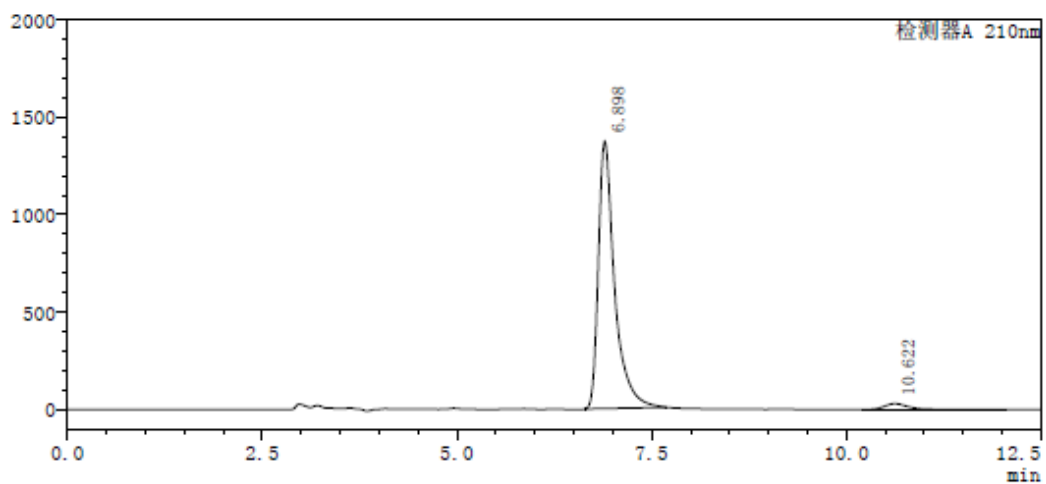

<Peak table>

检测器A 210nm

| Peak# | Ret. Time | Height  | Area     | Area%   |
|-------|-----------|---------|----------|---------|
| 1     | 6.898     | 1372034 | 19928398 | 96.980  |
| 2     | 10.622    | 29699   | 620496   | 3.020   |
| 总计    |           | 1401733 | 20548895 | 100.000 |

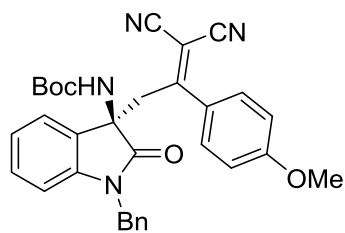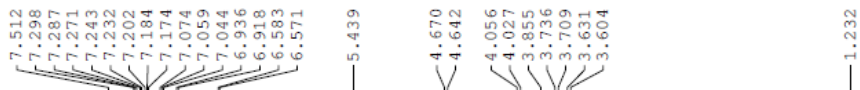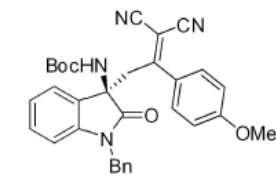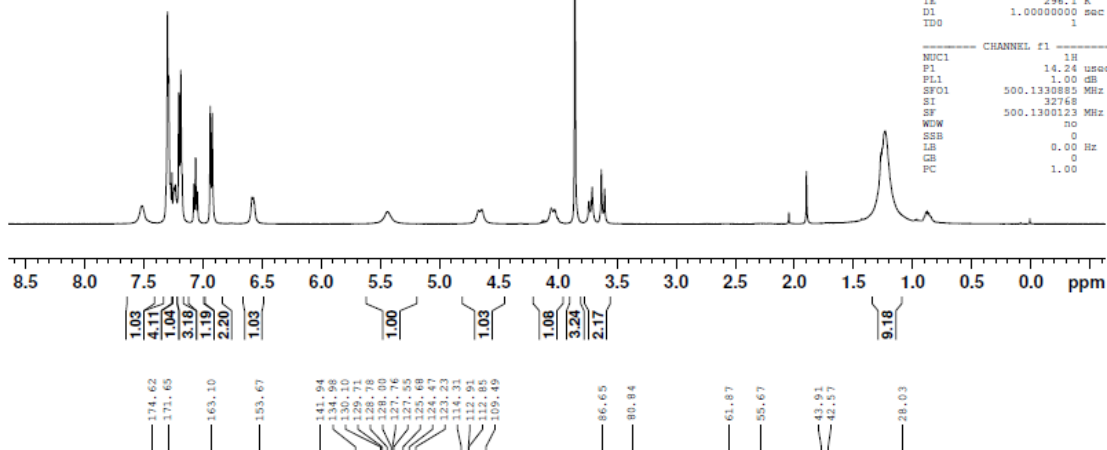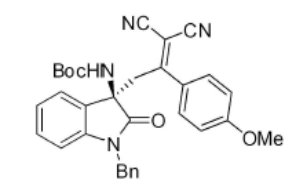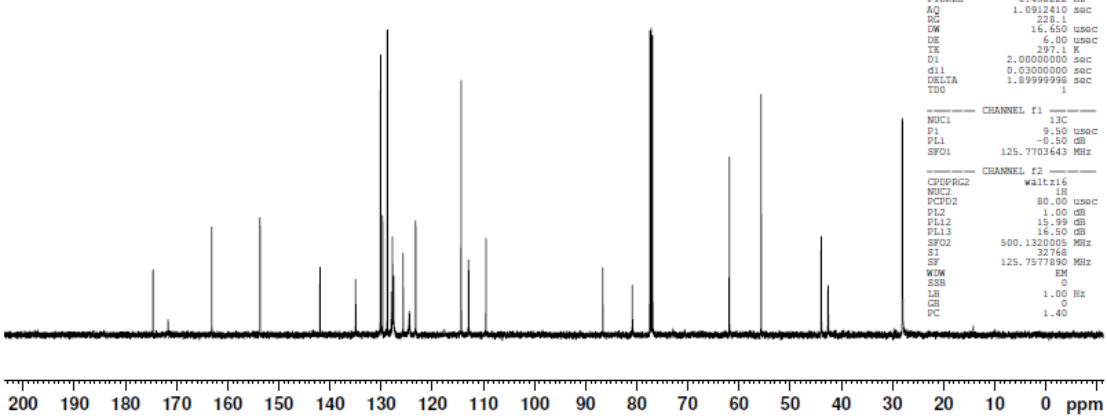

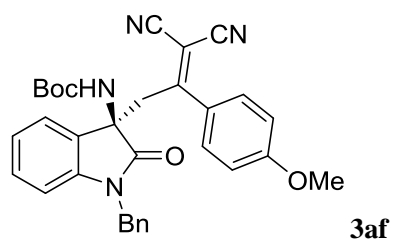

<chromatogram>

mV

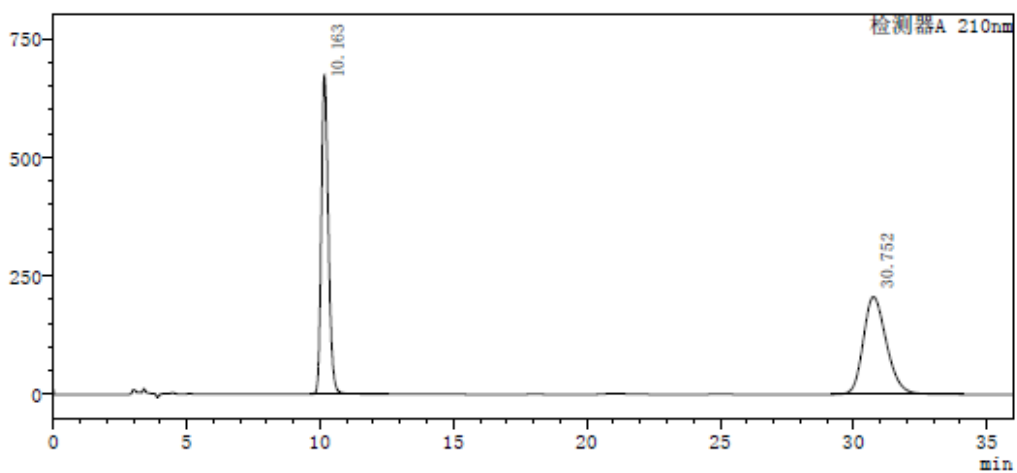

<Peak table>

检测器A 210nm

| Peak# | Ret. Time | Height | Area     | Area%   |
|-------|-----------|--------|----------|---------|
| 1     | 10.163    | 672132 | 12390311 | 49.997  |
| 2     | 30.752    | 205285 | 12391807 | 50.003  |
| 总计    |           | 877418 | 24782118 | 100.000 |

<chromatogram>

mV

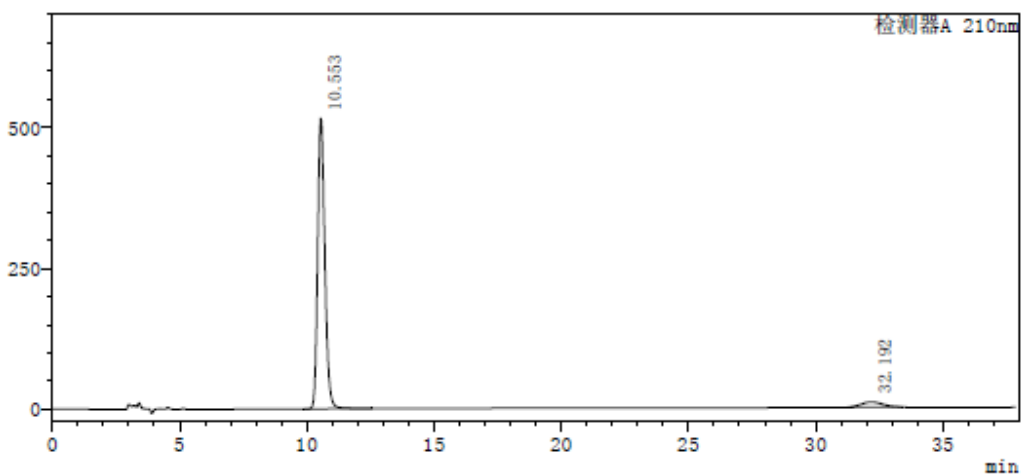

<Peak table>

检测器A 210nm

| Peak# | Ret. Time | Height | Area     | Area%   |
|-------|-----------|--------|----------|---------|
| 1     | 10.553    | 514129 | 10065869 | 94.841  |
| 2     | 32.192    | 9317   | 547597   | 5.159   |
| 总计    |           | 523446 | 10613466 | 100.000 |

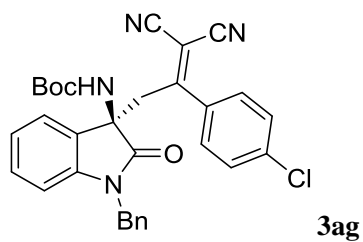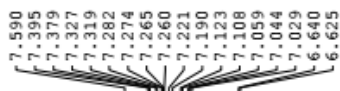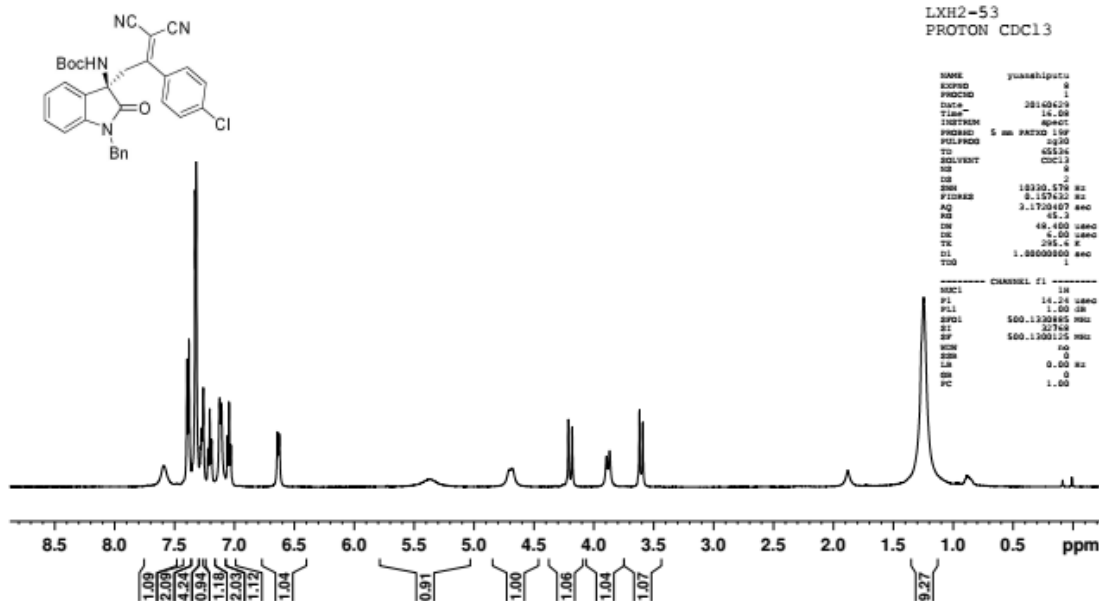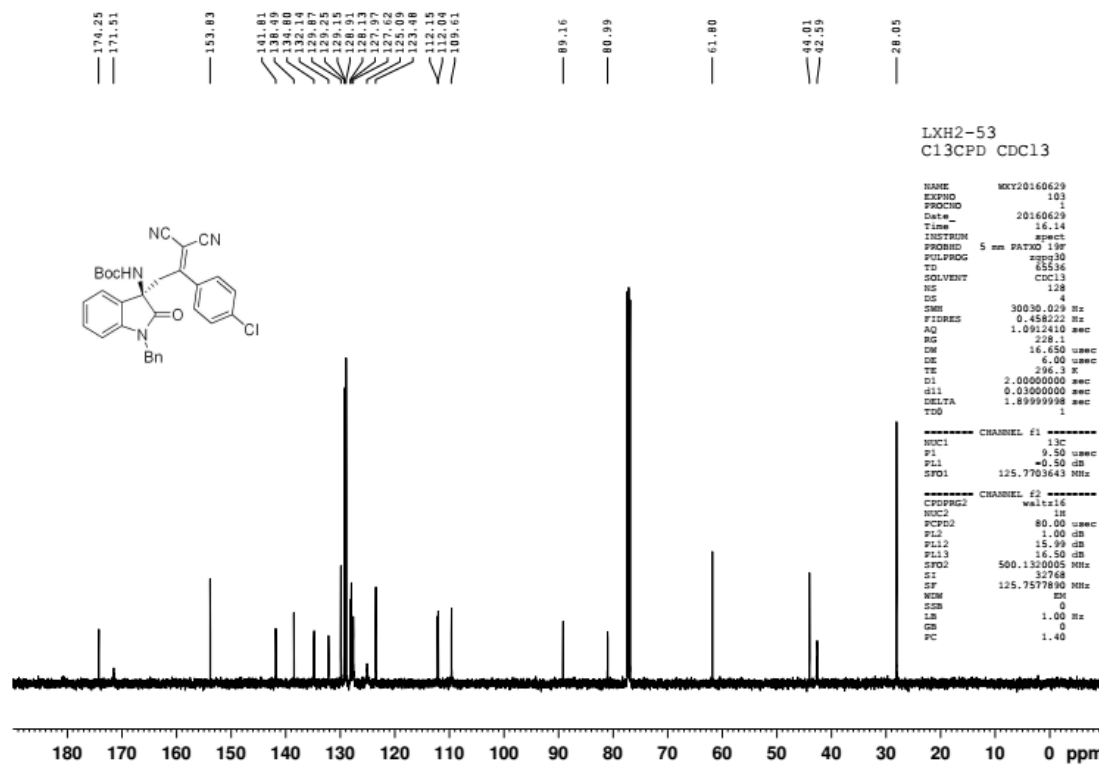

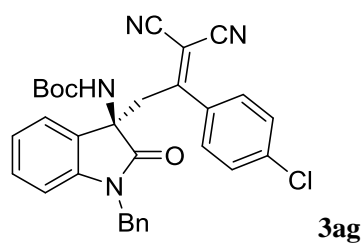

<chromatogram>

mV

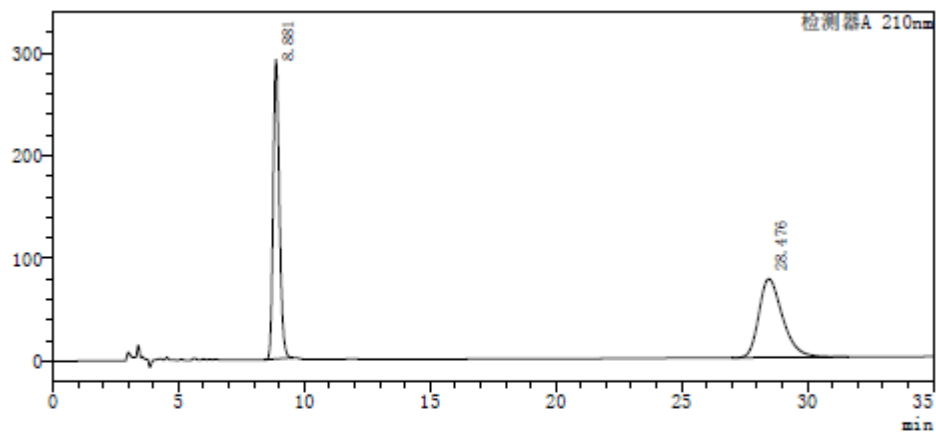

<Peak table>

检测器A 210nm

| Peak# | Ret. Time | Height | Area     | Area%   |
|-------|-----------|--------|----------|---------|
| 1     | 8.881     | 291540 | 4984065  | 49.782  |
| 2     | 28.476    | 76544  | 5027698  | 50.218  |
| 总计    |           | 368084 | 10011763 | 100.000 |

<chromatogram>

mV

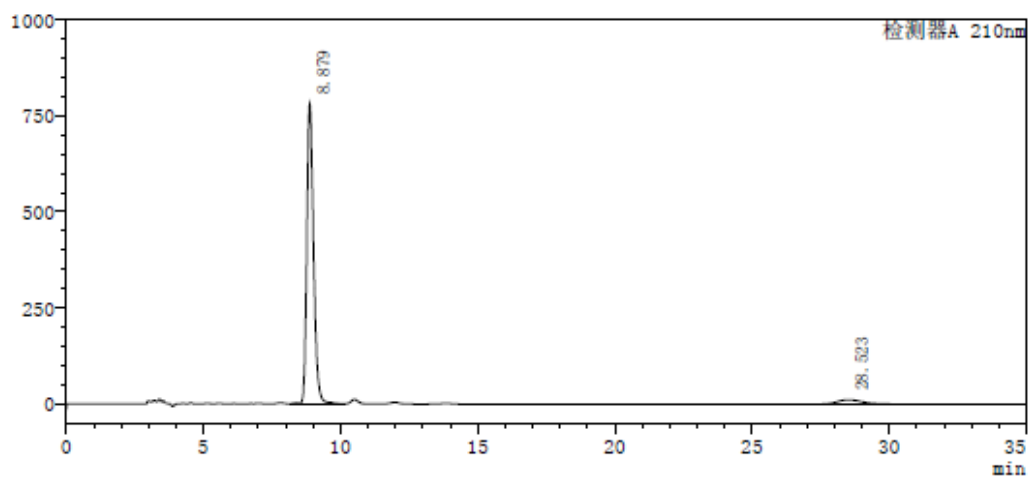

<Peak table>

检测器A 210nm

| Peak# | Ret. Time | Height | Area     | Area%   |
|-------|-----------|--------|----------|---------|
| 1     | 8.879     | 781608 | 13362526 | 94.820  |
| 2     | 28.523    | 11713  | 730003   | 5.180   |
| 总计    |           | 793322 | 14092529 | 100.000 |

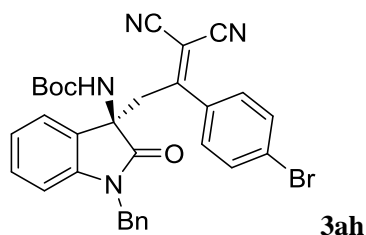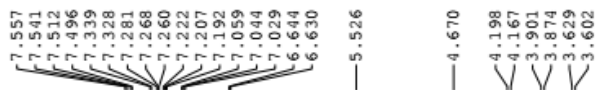

LXH2-32  
PROTON CDC13

```

NAME      WXY20160629
EXPNO    1
PROCNO   1
Date_    20160629
Time     15.46
INSTRUM  spect
PROBHD   5 mm PAXIO 19P
PULPROG  zg30
TD       65536
SOLVENT  CDCl3
NS       8
DS       2
SWH      10330.578 Hz
FIDRES   0.157632 Hz
AQ       3.1725407 sec
RG       35.9
DW       48.400 usec
DE       6.00 usec
TE       295.1 K
D1       1.0000000 sec
TD0      1

----- CHANNEL f1 -----
NUC1     1H
P1       14.24 usec
PL1     0.00 dB
SFO1    500.1330985 MHz
SI       32768
SF      500.1330120 MHz
WDW      no
SSB      0
LB       0.00 Hz
GB       0
PC       1.00

```

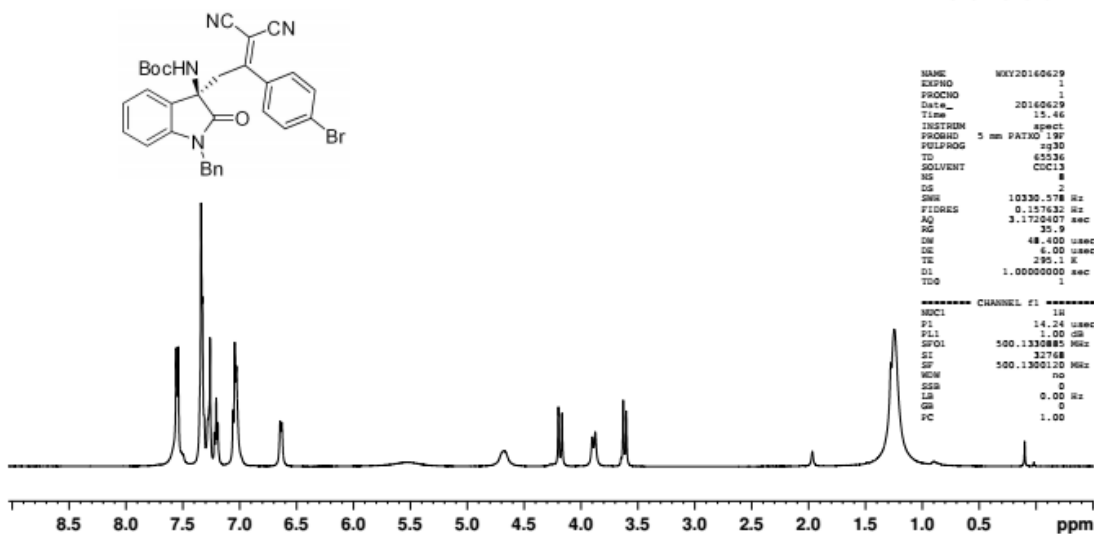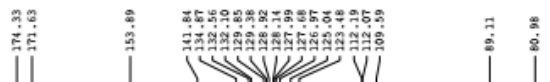

LXH2-32  
C13CPD CDC13

```

NAME      yuanahiputu
EXPNO    3
PROCNO   1
Date_    20160629
Time     15.49
INSTRUM  spect
PROBHD   5 mm PAXIO 19P
PULPROG  zgpg30
TD       65536
SOLVENT  CDCl3
NS       8
DS       4
SWH      30030.029 Hz
FIDRES   0.458222 Hz
AQ       1.0912410 sec
RG       128
DW       16.000 usec
DE       6.00 usec
TE       296.2 K
D1       2.0000000 sec
d11     0.0300000 sec
DELTA   1.8999998 sec
TD0      1

----- CHANNEL f1 -----
NUC1     13C
P1       9.50 usec
PL1     -0.50 dB
SFO1    125.7703643 MHz

----- CHANNEL f2 -----
CPDPRG2  wait:16
NUC2     1H
PCPD2    80.00 usec
PL2     1.00 dB
PL12    15.99 dB
PL13    16.50 dB
SFO2    500.1330985 MHz
SI       32768
SF      125.7577890 MHz
WDW      RM
SSB      0
LB       1.00 Hz
GB       0
PC       1.40

```

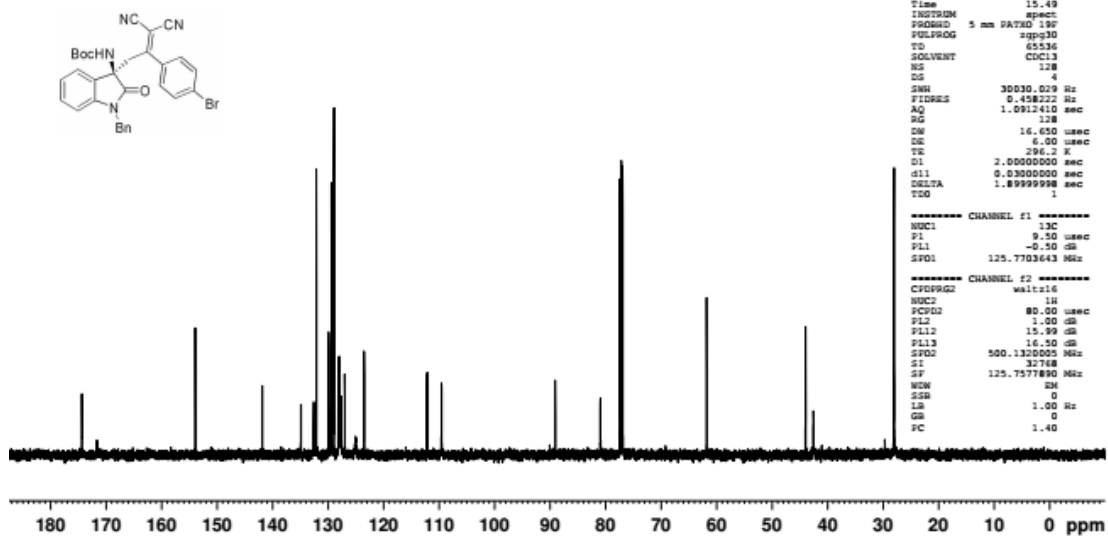



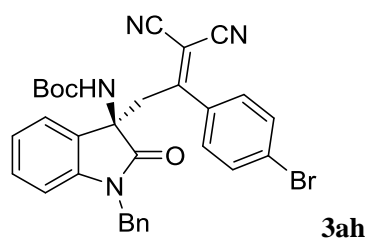

<chromatogram>

mV

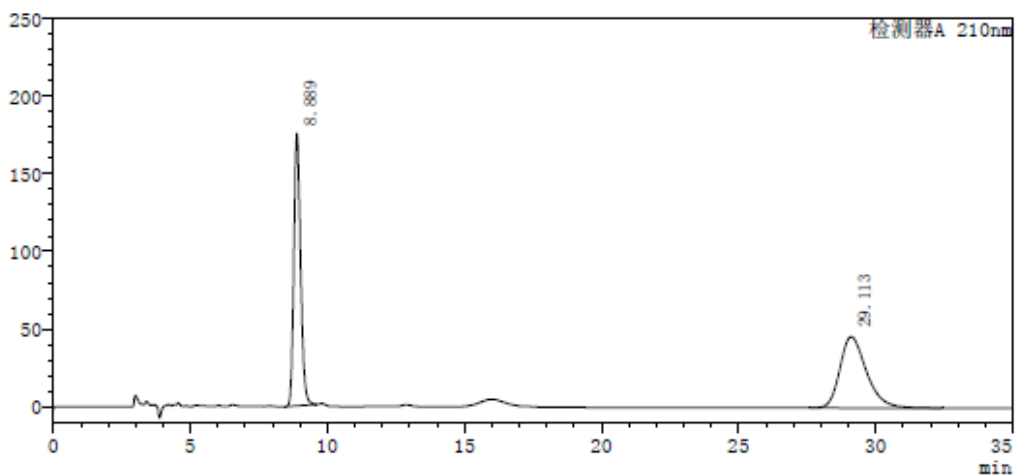

<Peak table>

检测器A 210nm

| Peak# | Ret. Time | Height | Area    | Area%   |
|-------|-----------|--------|---------|---------|
| 1     | 8.889     | 175320 | 2989496 | 49.143  |
| 2     | 29.113    | 45927  | 3093768 | 50.857  |
| 总计    |           | 221247 | 6083264 | 100.000 |

<chromatogram>

mV

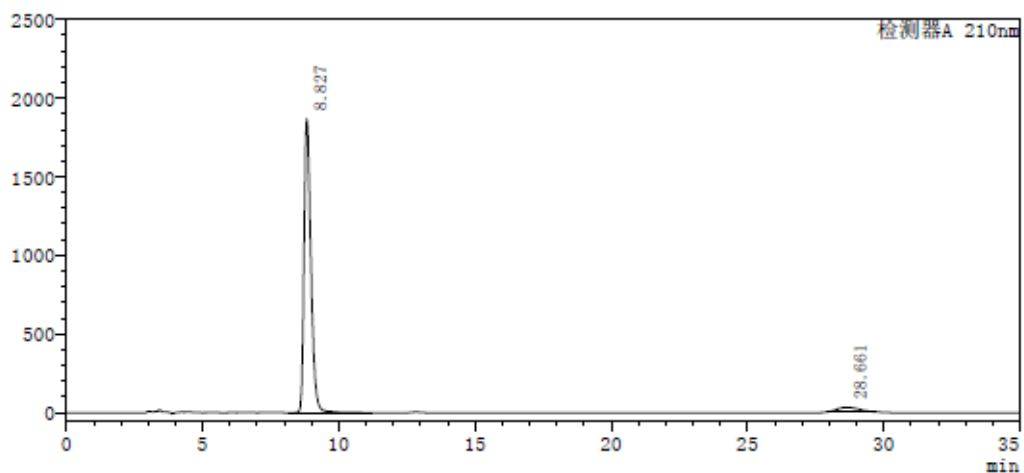

<Peak table>

检测器A 210nm

| Peak# | Ret. Time | Height  | Area     | Area%   |
|-------|-----------|---------|----------|---------|
| 1     | 8.827     | 1865597 | 32693282 | 95.133  |
| 2     | 28.661    | 30440   | 1672653  | 4.867   |
| 总计    |           | 1896037 | 34365935 | 100.000 |

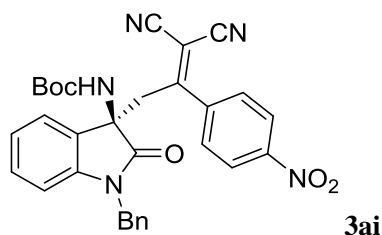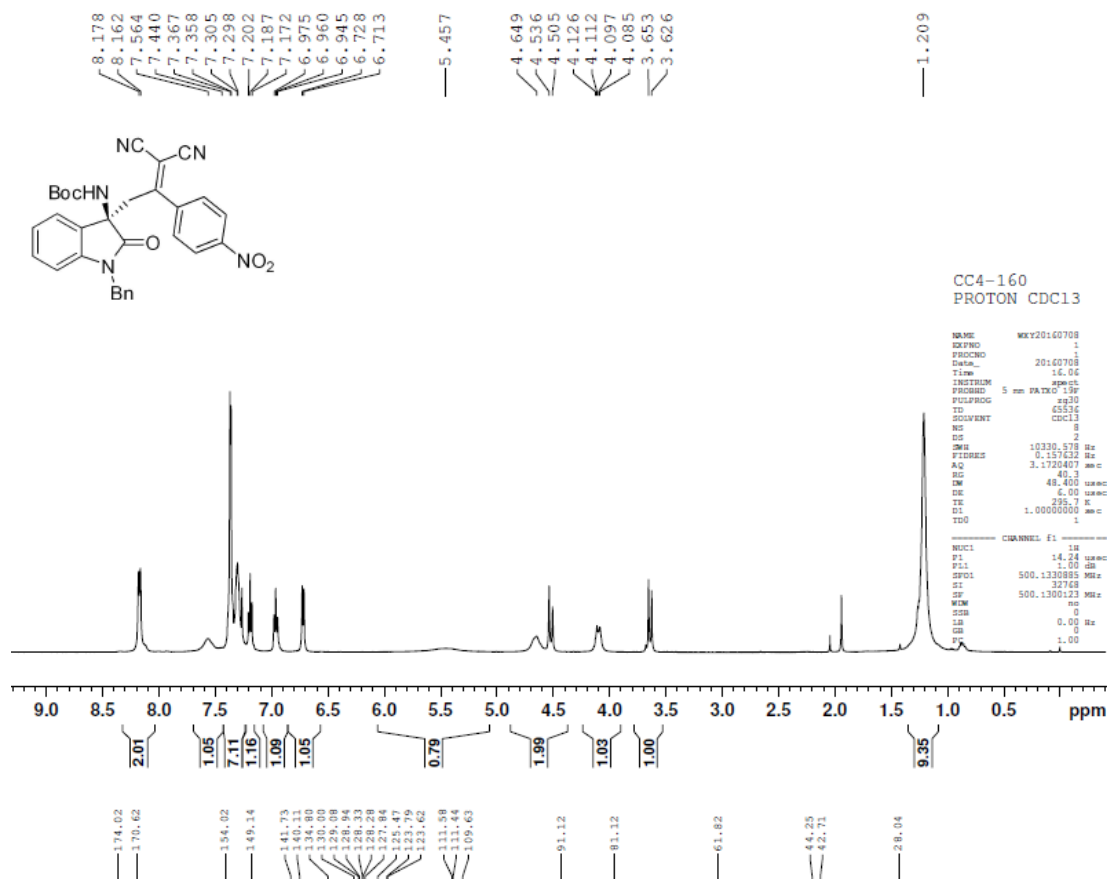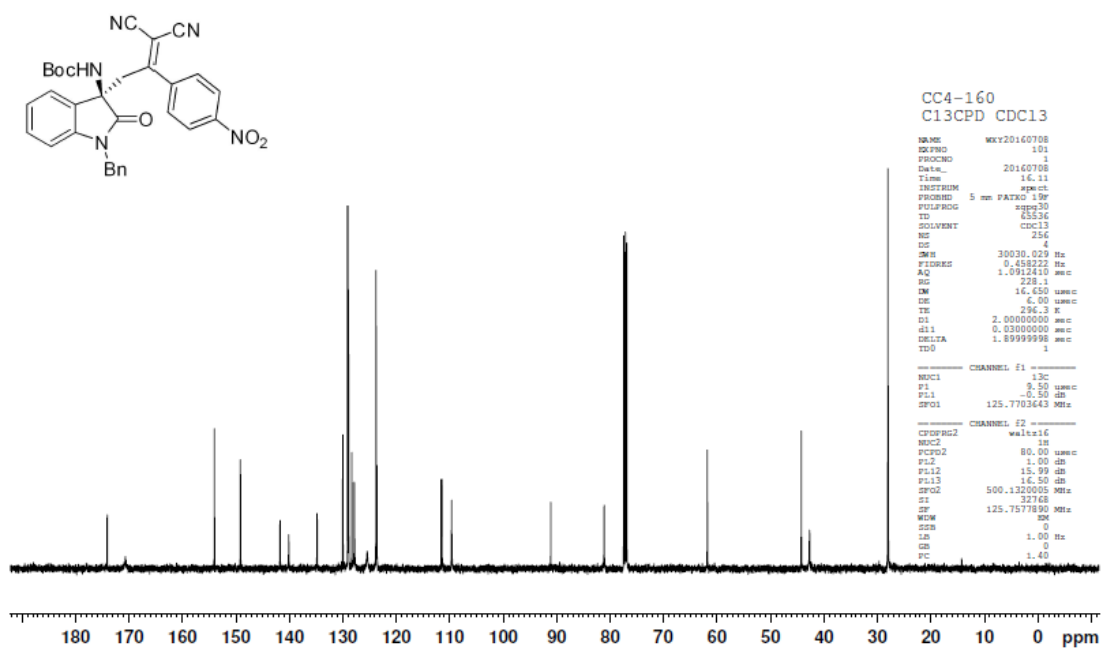

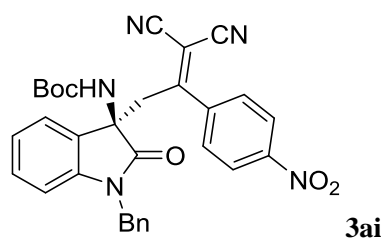

<chromatogram>

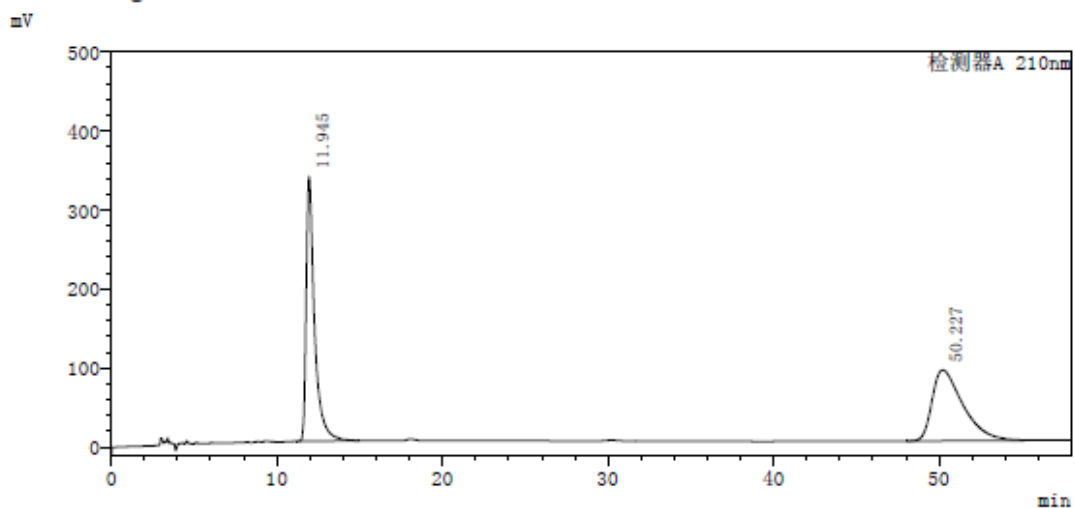

<Peak table>

检测器A 210nm

| Peak# | Ret. Time | Height | Area     | Area%   |
|-------|-----------|--------|----------|---------|
| 1     | 11.945    | 334405 | 11714169 | 50.099  |
| 2     | 50.227    | 89721  | 11667986 | 49.901  |
| 总计    |           | 424126 | 23382155 | 100.000 |

<chromatogram>

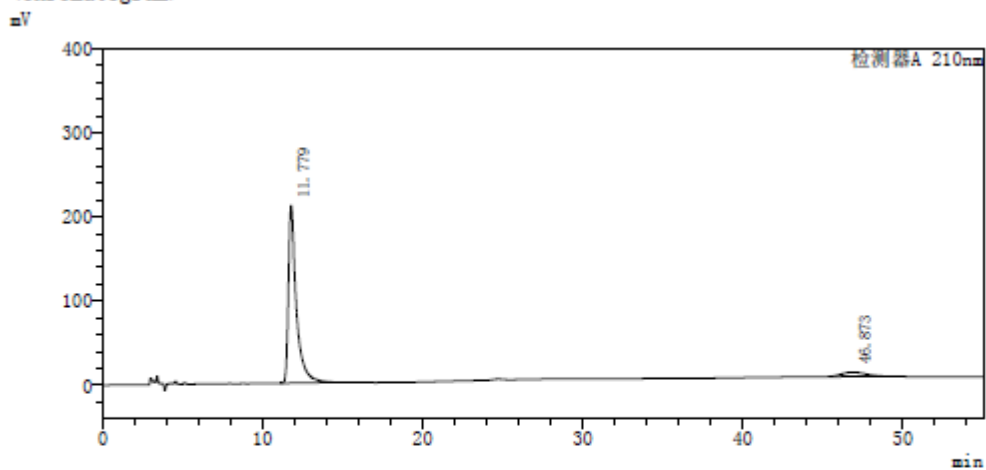

<Peak table>

检测器A 210nm

| Peak# | Ret. Time | Height | Area    | Area%   |
|-------|-----------|--------|---------|---------|
| 1     | 11.779    | 210860 | 7258858 | 93.004  |
| 2     | 46.873    | 5212   | 546071  | 6.996   |
| 总计    |           | 216072 | 7804929 | 100.000 |

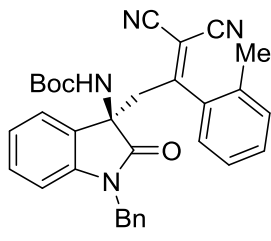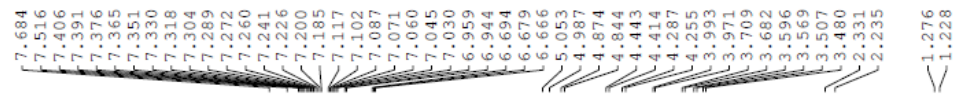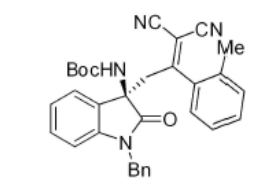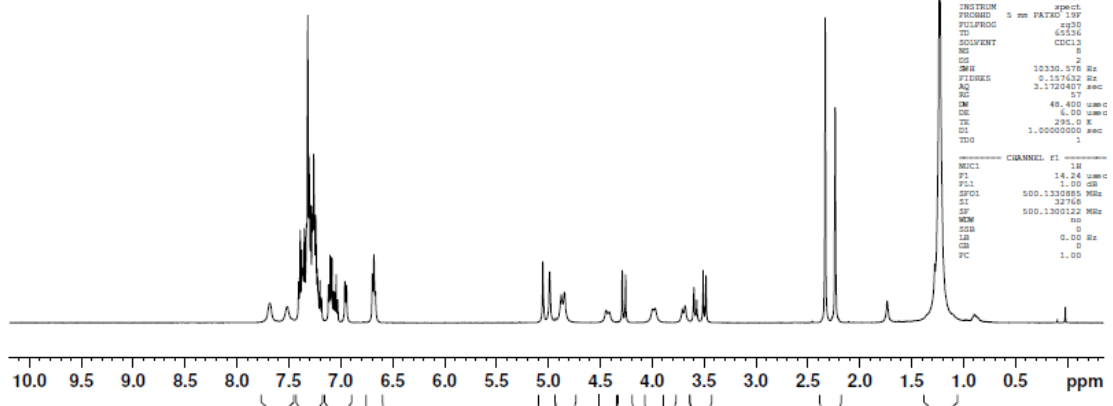

CC4-150  
PROTON CDC13

|         |                |
|---------|----------------|
| NAME    | KEY20160705    |
| EXPNO   | 1              |
| F2PROC  | 1              |
| Date_   | 20160705       |
| Time    | 14.07          |
| INSTRUM | axcpct         |
| PROBHD  | 5 mm PATTI 199 |
| PULPROG | zgpg30         |
| TD      | 65536          |
| SOLVENT | CDCl3          |
| NS      | 8              |
| DS      | 2              |
| SWH     | 10330.578 Hz   |
| FIDRES  | 0.101630 Hz    |
| AQ      | 3.1720407 sec  |
| RG      | 57             |
| RM      | 48.600 umsec   |
| DE      | 6.00 umsec     |
| TE      | 295.0 K        |
| D1      | 1.00000000 sec |
| TDD     | 1              |

----- CHANNEL f1 -----

|      |                 |
|------|-----------------|
| MUCL | 18              |
| PL   | 14.24 umsec     |
| PL1  | 1.00 dB         |
| SFO1 | 500.1300855 MHz |
| ZF   | 32768           |
| SF   | 500.1300122 MHz |
| NUC1 | 13C             |
| SSB  | 0               |
| LB   | 0.00 Hz         |
| GB   | 0               |
| PC   | 1.00            |

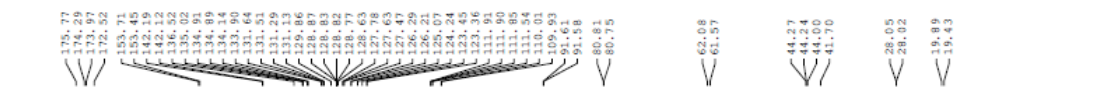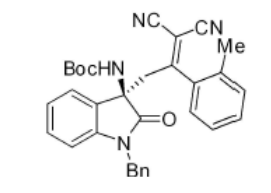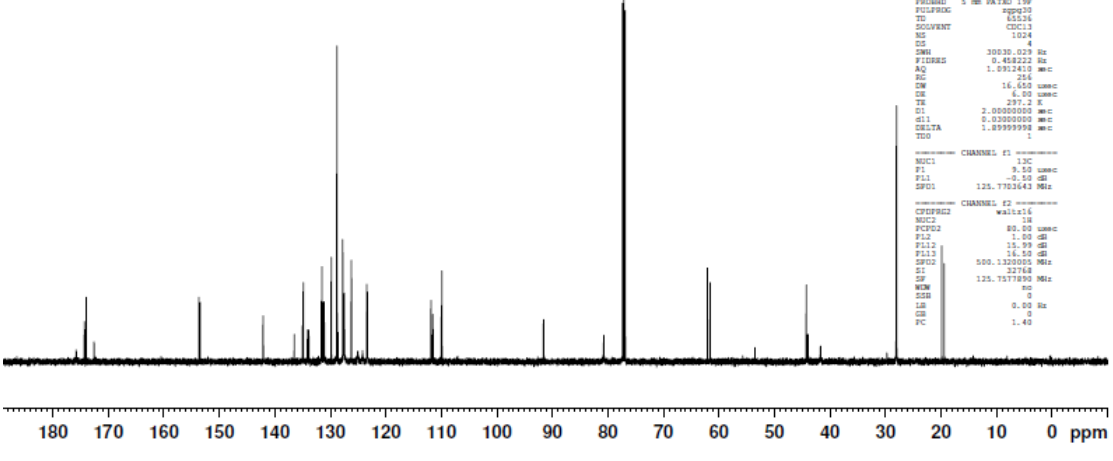

CC4-150  
C13CPD CDC13

|         |                |
|---------|----------------|
| NAME    | KEY20160705    |
| EXPNO   | 2              |
| F2PROC  | 1              |
| Date_   | 20160705       |
| Time    | 15.46          |
| INSTRUM | axcpct         |
| PROBHD  | 5 mm PATTI 199 |
| PULPROG | zgpg30         |
| TD      | 65536          |
| SOLVENT | CDCl3          |
| NS      | 1024           |
| DS      | 4              |
| SWH     | 30530.029 Hz   |
| FIDRES  | 0.482222 Hz    |
| AQ      | 1.5912410 sec  |
| RG      | 256            |
| RM      | 16.600 umsec   |
| DE      | 6.00 umsec     |
| TE      | 297.2 K        |
| D1      | 2.00000000 sec |
| d11     | 0.03000000 sec |
| DELTA   | 1.89999999 sec |
| TDD     | 1              |

----- CHANNEL f1 -----

|      |                 |
|------|-----------------|
| MUCL | 13C             |
| PL   | 3.00 umsec      |
| PL1  | -0.50 dB        |
| SFO1 | 125.7703643 MHz |

----- CHANNEL f2 -----

|        |                 |
|--------|-----------------|
| wait16 | 16              |
| MUCL2  | 13C             |
| PL2    | 80.00 umsec     |
| PL12   | 1.00 dB         |
| PL12   | 15.99 dB        |
| PL12   | 16.00 dB        |
| SFO2   | 500.1300000 MHz |
| ZF     | 32768           |
| SF     | 125.7577890 MHz |
| NUC2   | 13C             |
| SSB    | 0               |
| LB     | 0.00 Hz         |
| GB     | 0               |
| PC     | 1.40            |

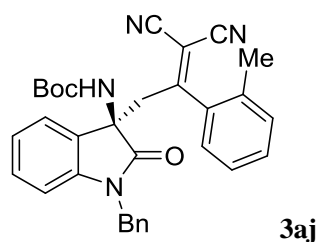

<chromatogram>

mV

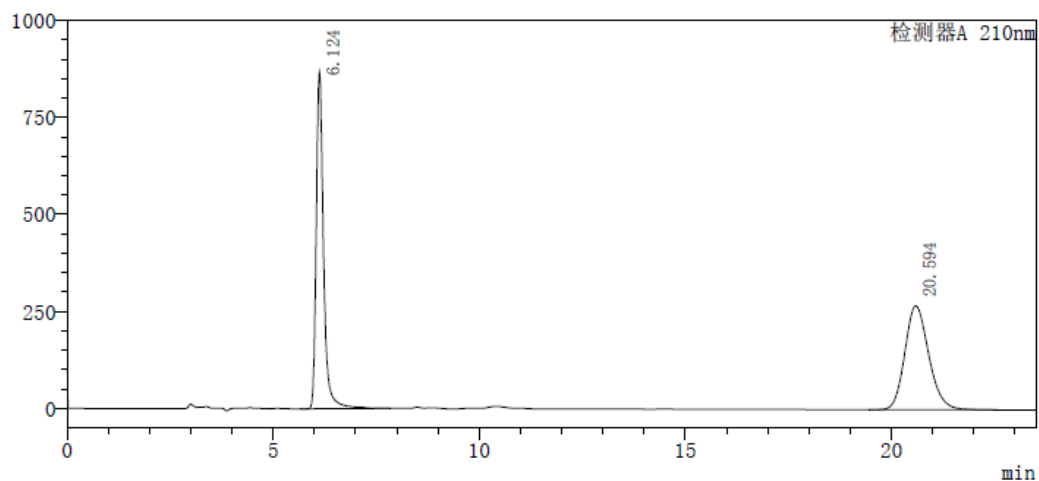

<Peak table>

检测器A 210nm

| Peak# | Ret. Time | Height  | Area     | Area%   |
|-------|-----------|---------|----------|---------|
| 1     | 6.124     | 869194  | 10714157 | 49.705  |
| 2     | 20.594    | 268143  | 10841162 | 50.295  |
| 总计    |           | 1137336 | 21555319 | 100.000 |

<chromatogram>

mV

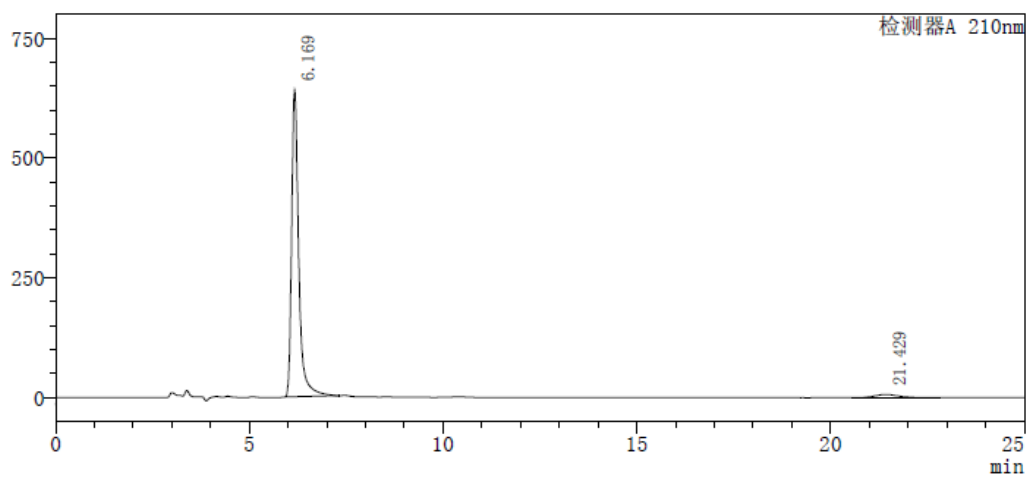

<Peak table>

检测器A 210nm

| Peak# | Ret. Time | Height | Area    | Area%   |
|-------|-----------|--------|---------|---------|
| 1     | 6.169     | 640337 | 8174900 | 96.882  |
| 2     | 21.429    | 6325   | 263080  | 3.118   |
| 总计    |           | 646661 | 8437980 | 100.000 |

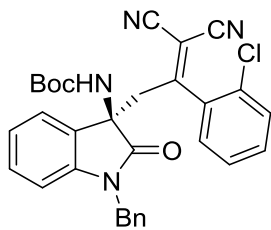

**3ak**

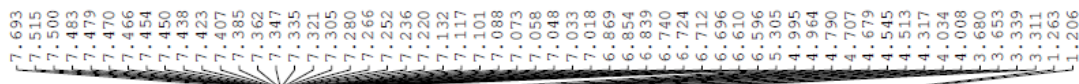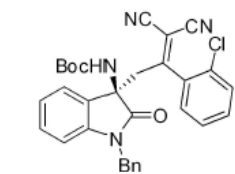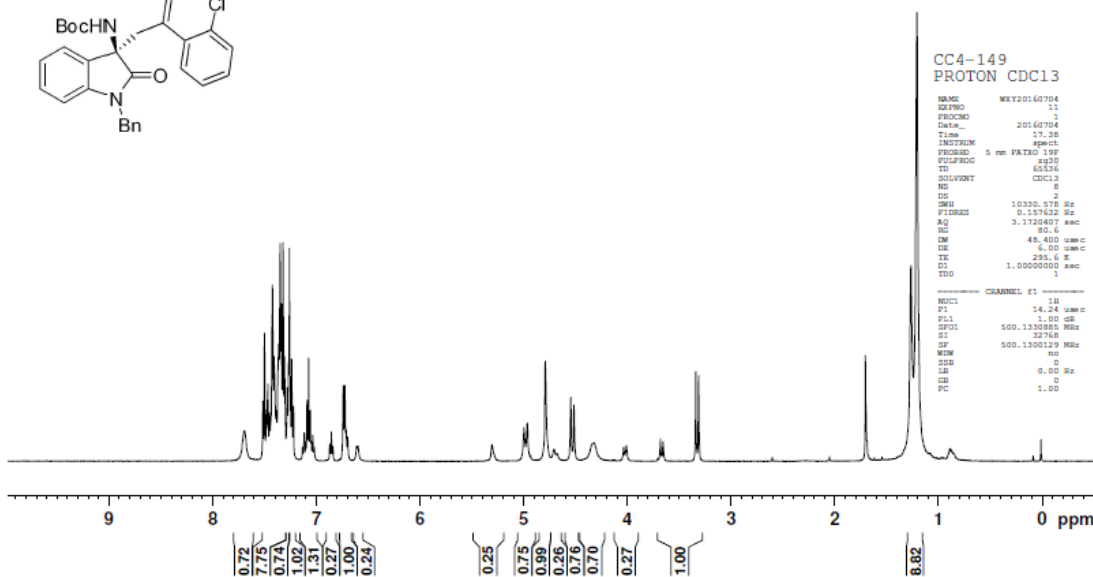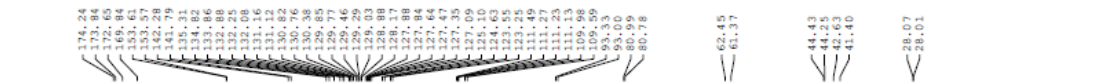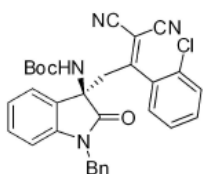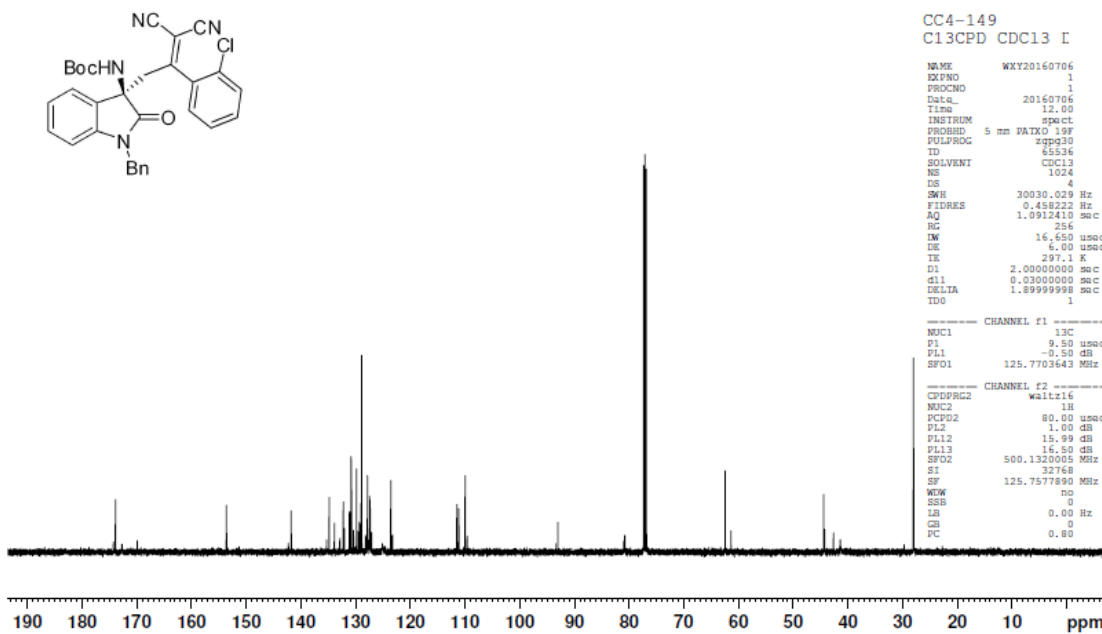

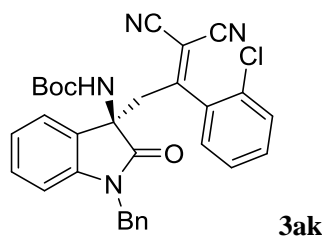

<chromatogram>

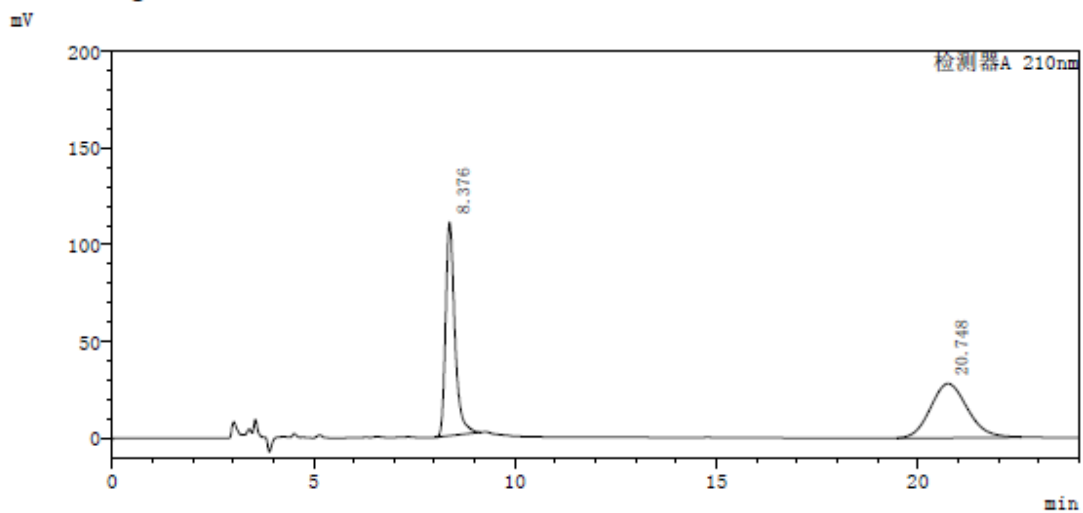

<Peak table>

检测器A 210nm

| Peak# | Ret. Time | Height | Area    | Area%   |
|-------|-----------|--------|---------|---------|
| 1     | 8.376     | 110142 | 1755680 | 49.301  |
| 2     | 20.748    | 28059  | 1805431 | 50.699  |
| 总计    |           | 138201 | 3561111 | 100.000 |

<chromatogram>

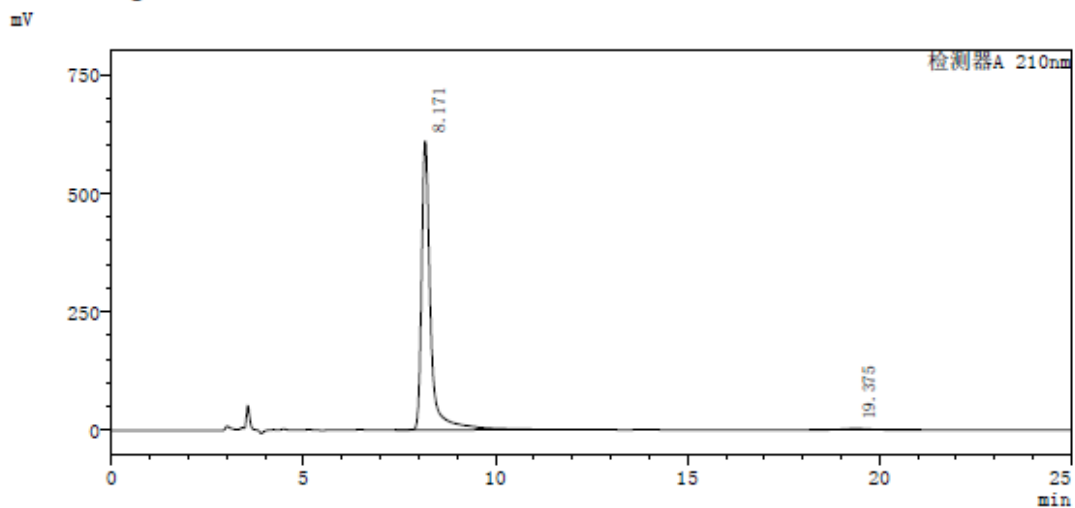

<Peak table>

检测器A 210nm

| Peak# | Ret. Time | Height | Area     | Area%   |
|-------|-----------|--------|----------|---------|
| 1     | 8.171     | 608188 | 9965087  | 98.454  |
| 2     | 19.375    | 2913   | 156472   | 1.546   |
| 总计    |           | 611100 | 10121559 | 100.000 |

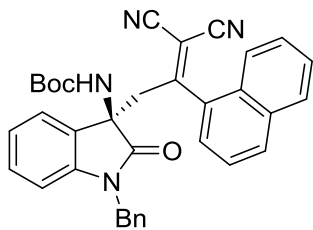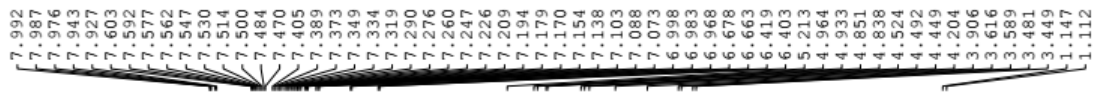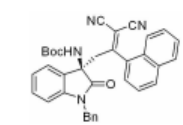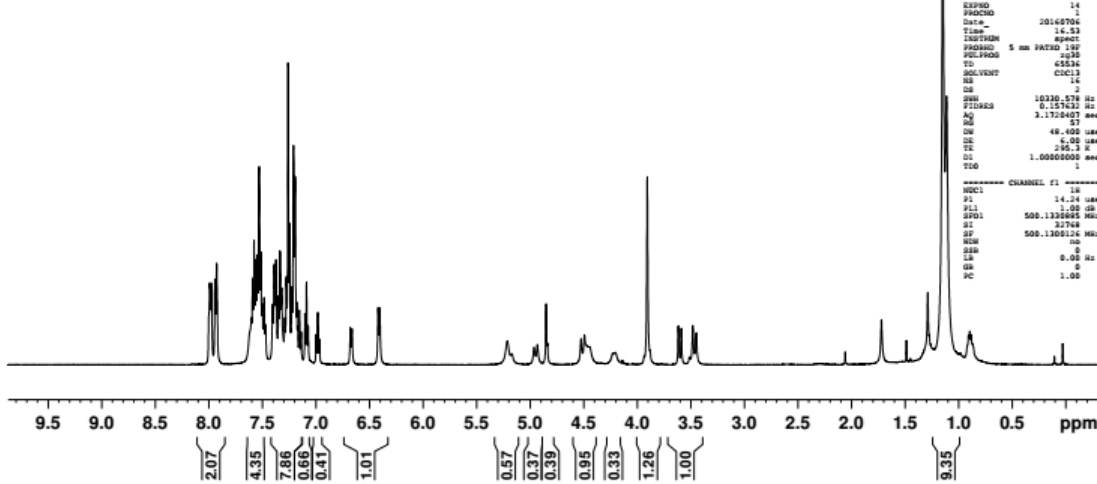

LXH-2-59-2  
PROTON CDCl3

```

NAME          lxh11kh
EXPNO         14
PROCNO        1
Date_         20160704
Time          16.33
INSTRUM       spect
PROBHD        5 mm PABBO 13P
PULPROG       zgpg30
TD            65536
SOLVENT       CDCl3
NS            2
DS            4
SWH           10330.578 Hz
FIDRES        0.157623 Hz
AQ            1.1720427 sec
RG            327
WDW            EM
SSB            0
LB            46.400 usec
DE            6.00 usec
TE            296.2 K
D1            2.00000000 sec
DELTA         1.00000000 sec
TD0           1

----- CHANNEL f1 -----
NUC1          13C
P1            14.24 usec
PL1           1.00 dB
SFO1          500.1320000 MHz
SI            32768
SF            500.1320000 MHz
WDW            EM
SSB            0
LB            0.00 Hz
GB            0
PC            1.00
  
```

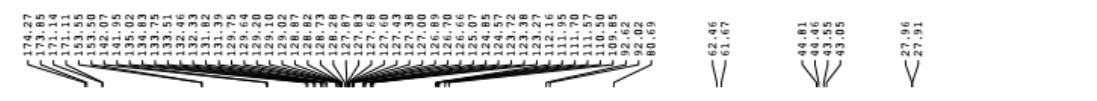

LXH2-59-2  
C13CPD CDCl3

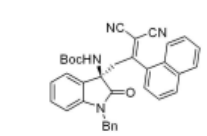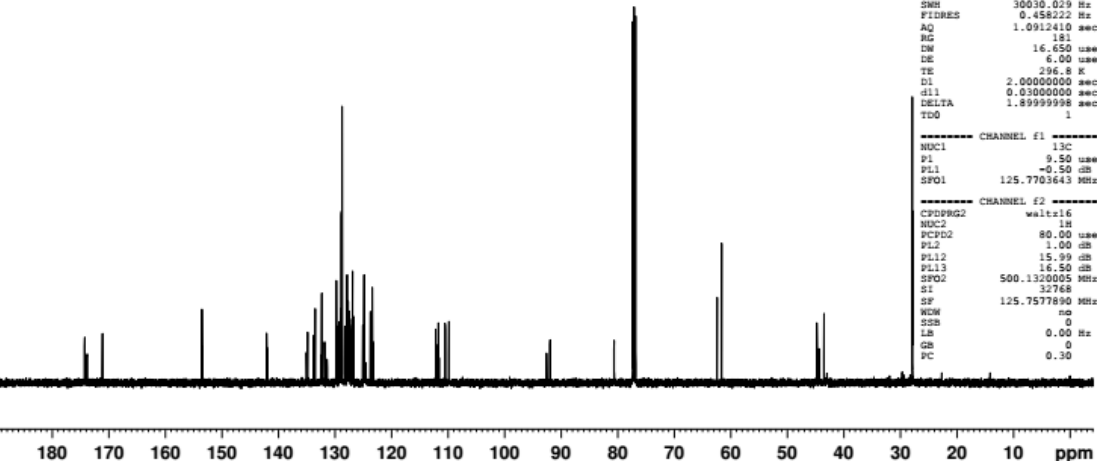

```

NAME          lxh11kh
EXPNO         13
PROCNO        1
Date_         20160709
Time          21.55
INSTRUM       spect
PROBHD        5 mm PABBO 13P
PULPROG       zgpg30
TD            65536
SOLVENT       CDCl3
NS            4
DS            4
SWH           30030.029 Hz
FIDRES        0.458222 Hz
AQ            1.0912410 sec
RG            181
WDW            EM
SSB            0
LB            16.650 usec
DE            6.00 usec
TE            296.2 K
D1            2.00000000 sec
DELTA         0.03000000 sec
TD0           1

----- CHANNEL f1 -----
NUC1          13C
P1            9.50 usec
PL1           -0.50 dB
SFO1          125.7703643 MHz

----- CHANNEL f2 -----
CPDPRG2      waltz16
NUC2          1H
PCPD2         80.00 usec
PL2            1.00 dB
PL12          15.99 dB
PL13          16.50 dB
SFO2          500.1320000 MHz
SI            32768
SF            125.7577890 MHz
WDW            EM
SSB            0
LB            0.00 Hz
GB            0
PC            0.30
  
```



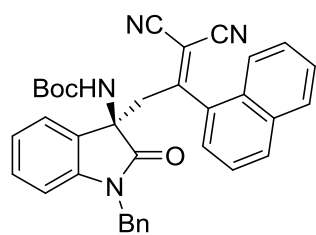

3a1

<chromatogram>

mV

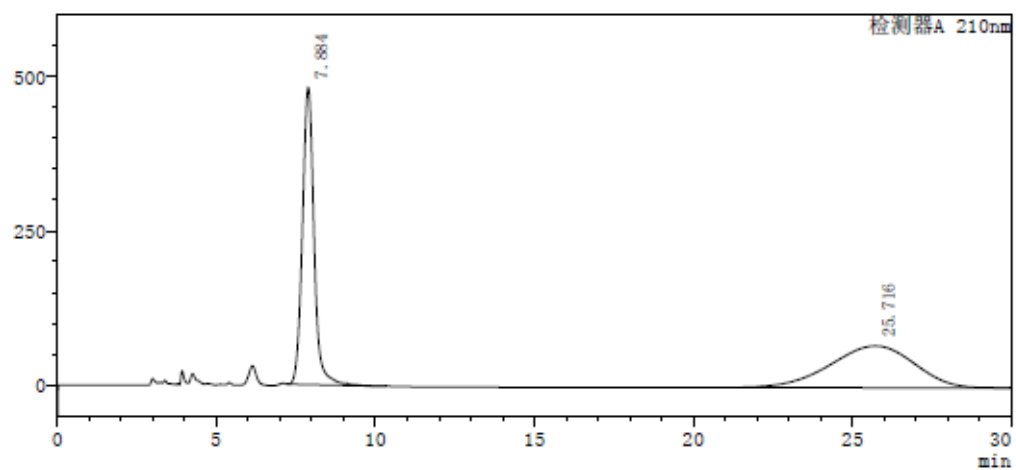

<Peak table>

检测器A 210nm

| Peak# | Ret. Time | Height | Area     | Area%   |
|-------|-----------|--------|----------|---------|
| 1     | 7.884     | 482337 | 12324222 | 49.710  |
| 2     | 25.716    | 67671  | 12468258 | 50.290  |
| 总计    |           | 550007 | 24792480 | 100.000 |

<chromatogram>

mV

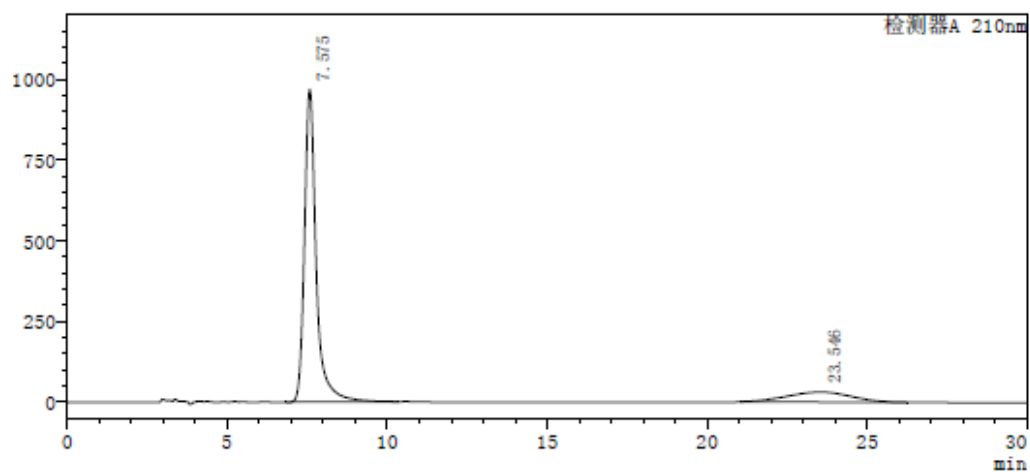

<Peak table>

检测器A 210nm

| Peak# | Ret. Time | Height | Area     | Area%   |
|-------|-----------|--------|----------|---------|
| 1     | 7.575     | 968021 | 24718276 | 85.363  |
| 2     | 23.546    | 30885  | 4238370  | 14.637  |
| 总计    |           | 998906 | 28956646 | 100.000 |

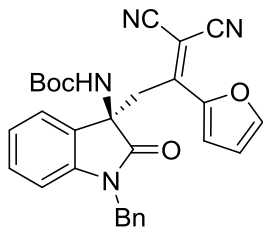

**3am**

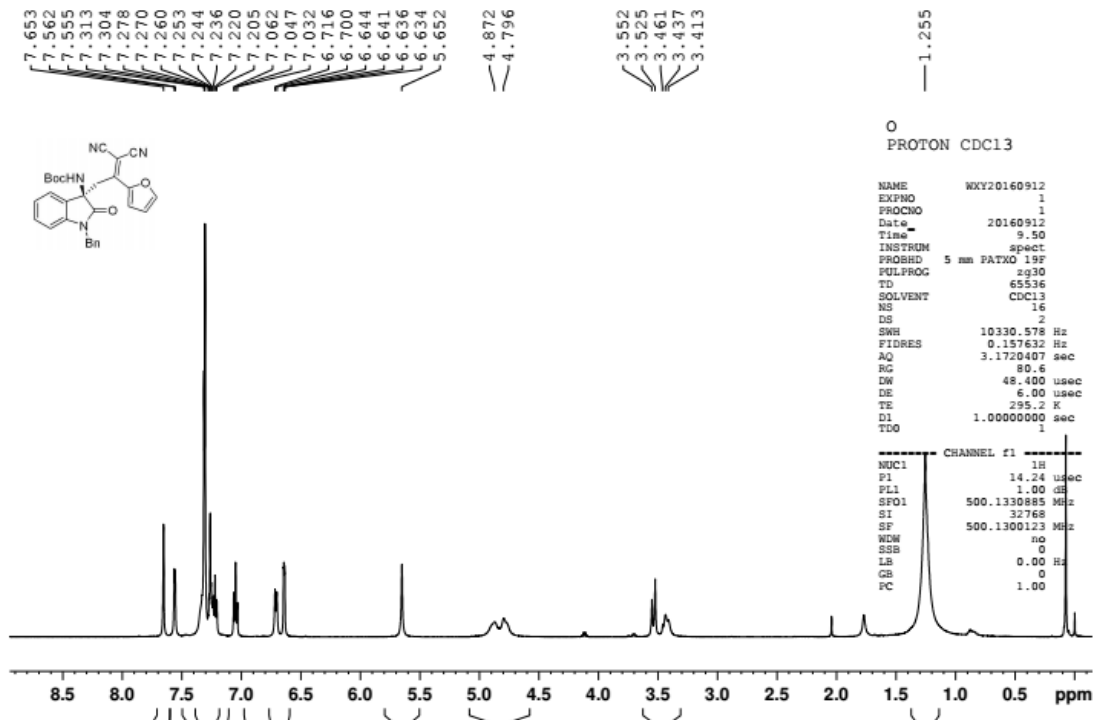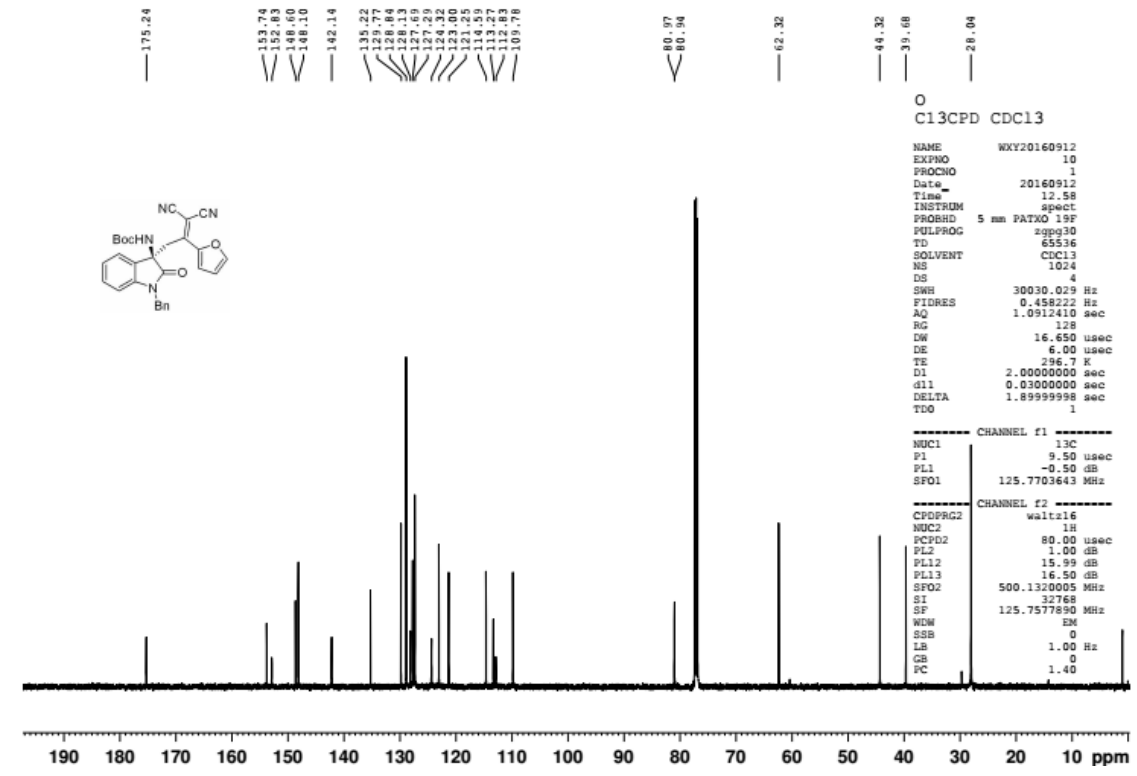

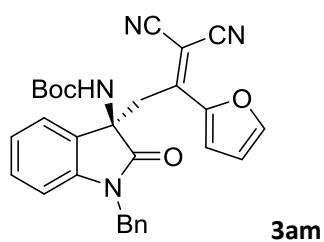

<chromatogram>

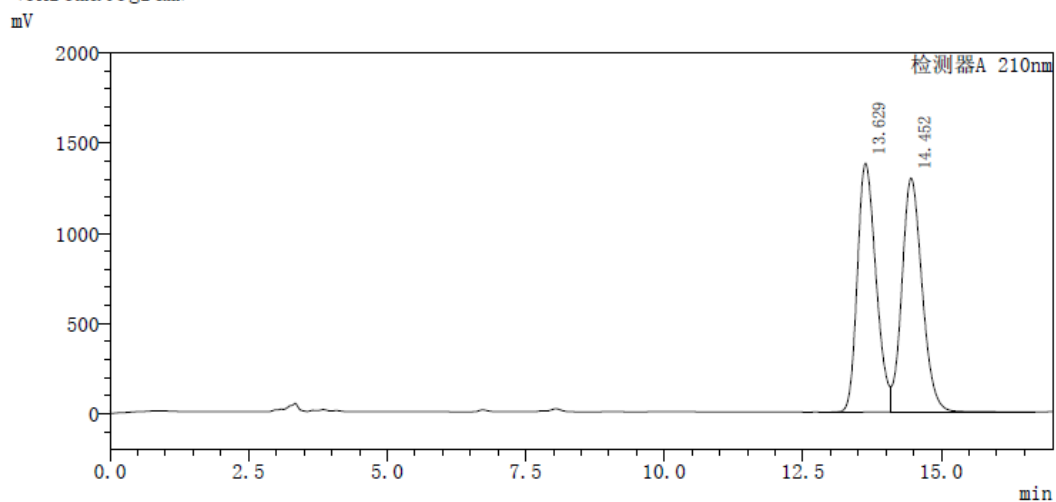

<Peak table>

检测器A 210nm

| Peak# | Ret. Time | Height  | Area     | Area%   |
|-------|-----------|---------|----------|---------|
| 1     | 13.629    | 1380258 | 32331702 | 49.412  |
| 2     | 14.452    | 1297283 | 33101644 | 50.588  |
| 总计    |           | 2677541 | 65433347 | 100.000 |

<chromatogram>

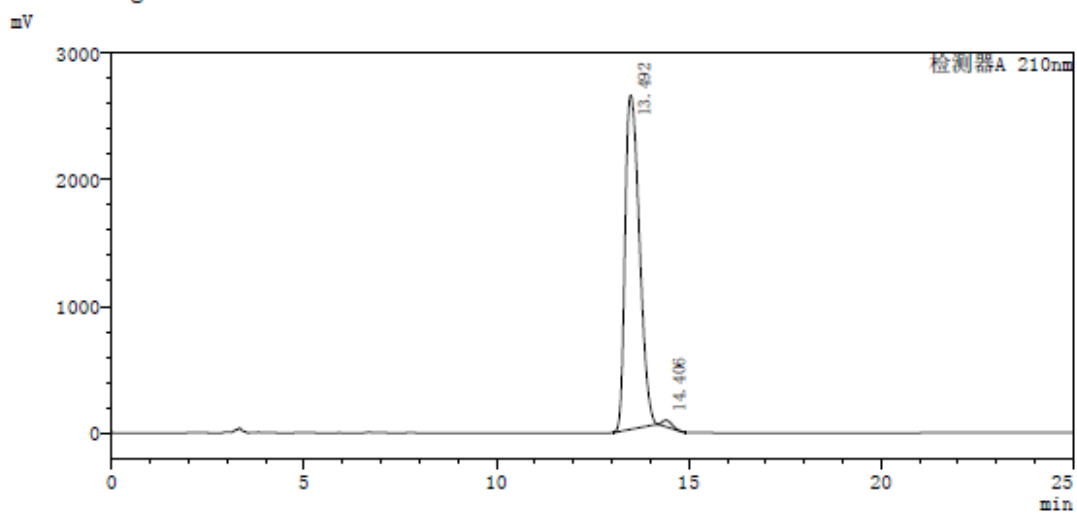

<Peak table>

检测器A 210nm

| Peak# | Ret. Time | Height  | Area     | Area%   |
|-------|-----------|---------|----------|---------|
| 1     | 13.492    | 2637652 | 68531158 | 98.716  |
| 2     | 14.406    | 51157   | 891278   | 1.284   |
| 总计    |           | 2688809 | 69422436 | 100.000 |

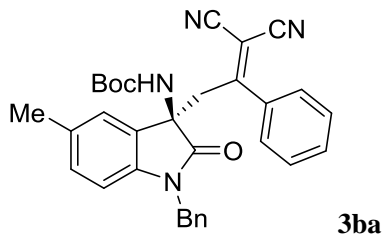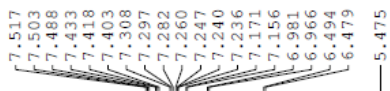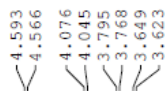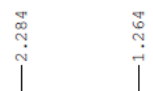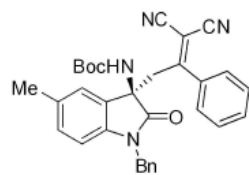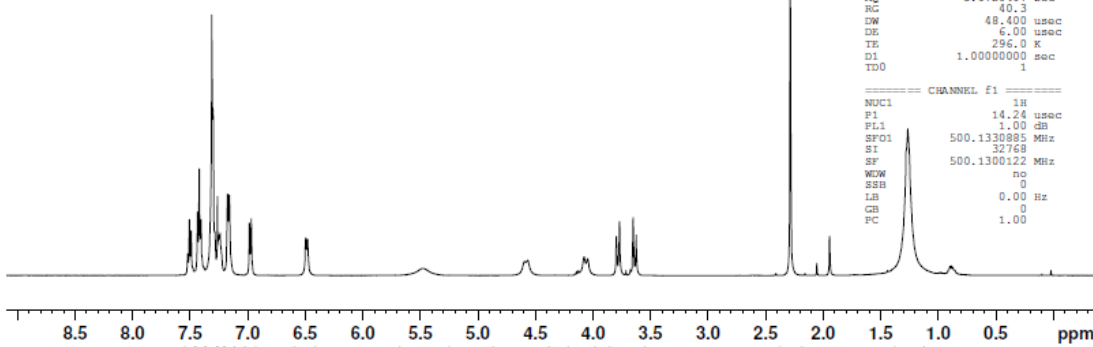

CC4-156  
PROTON CDC13

```

NAME      WKY20160704
EXPNO    14
PROCNO   1
Date_    20160704
Time     17.49
INSTRUM  spect
PROBHD   5 mm PAIXO 19F
PULPROG  zg30
ID       65536
SOLVENT  CDC13
NS       8
DS       2
SWH      10330.578 Hz
FIDRES   0.157632 Hz
AQ       3.1720407
RG       40.3
SC       48.400 usec
DE       6.00 usec
TE       296.0 K
D1       1.00000000 sec
TD0      1
===== CHANNEL f1 =====
NUC1     1H
P1       14.24 usec
PL1      1.00 dB
SFO1     500.1300895 MHz
SI       32768
SF       500.1300122 MHz
WOW      no
SSB      0
LB       0.00 Hz
GB       0
PC       1.00

```

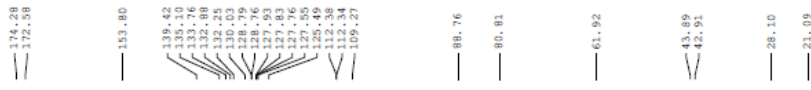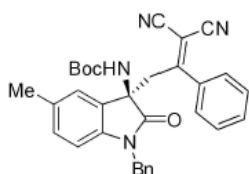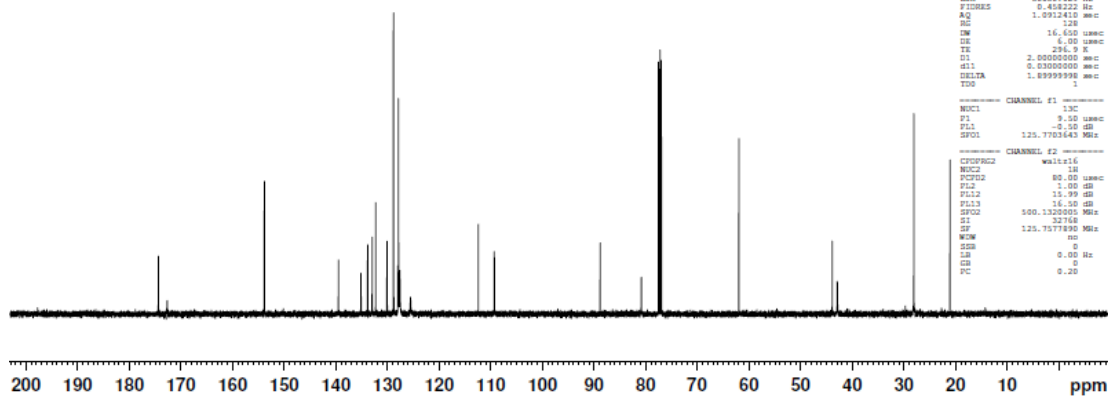

CC4-156  
C13CPD CDC13

```

NAME      WKY20160705
EXPNO    8
PROCNO   1
Date_    20160705
Time     20.50
INSTRUM  spect
PROBHD   5 mm PAIXO 19F
PULPROG  zgpg30
ID       65536
SOLVENT  CDC13
NS       4
DS       4
SWH      30030.029 Hz
FIDRES   0.493220 Hz
AQ       1.0912410 sec
RG       128
SC       16.650 usec
DE       6.00 usec
TE       296.9 K
D1       1.00000000 sec
d11      0.03000000 sec
DELTA    1.89999999 sec
TD0      1
===== CHANNEL f1 =====
NUC1     13C
P1       9.50 usec
PL1      0.20 dB
SFO1     125.7701643 MHz
===== CHANNEL f2 =====
CPDPRG2  waltz16
NUC2     15N
PCPD2    80.00 usec
PL2      1.00 dB
PL12     15.99 dB
PL13     16.50 dB
SFO2     500.1326001 MHz
SI       32768
SF       125.7571850 MHz
WOW      no
SSB      0
LB       0.00 Hz
GB       0
PC       0.20

```

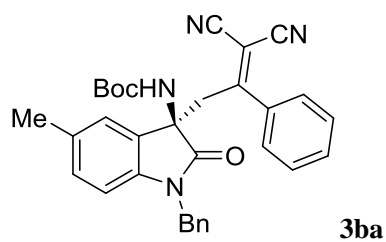

<chromatogram>

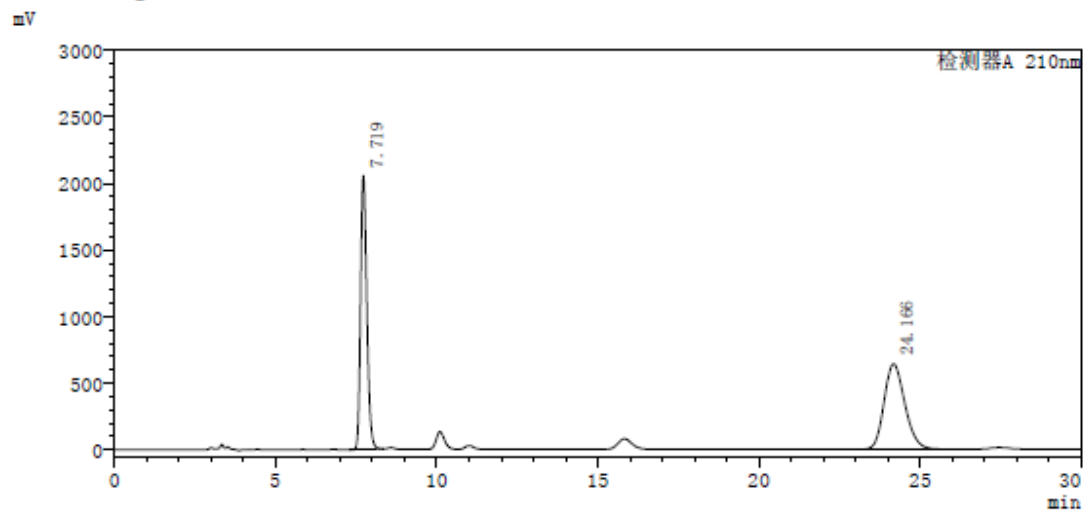

<Peak table>

检测器A 210nm

| Peak# | Ret. Time | Height  | Area     | Area%   |
|-------|-----------|---------|----------|---------|
| 1     | 7.719     | 2052155 | 27762230 | 49.334  |
| 2     | 24.166    | 641065  | 28511566 | 50.666  |
| 总计    |           | 2693220 | 56273796 | 100.000 |

<chromatogram>

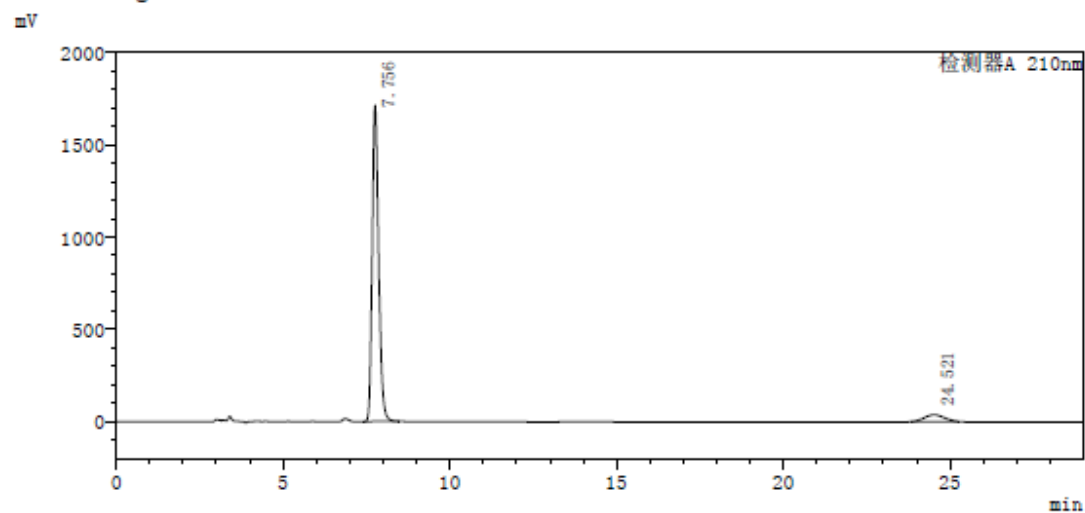

<Peak table>

检测器A 210nm

| Peak# | Ret. Time | Height  | Area     | Area%   |
|-------|-----------|---------|----------|---------|
| 1     | 7.756     | 1706164 | 23115344 | 93.929  |
| 2     | 24.521    | 36642   | 1494156  | 6.071   |
| 总计    |           | 1742806 | 24609499 | 100.000 |

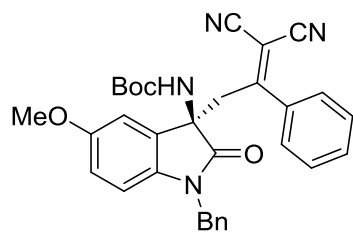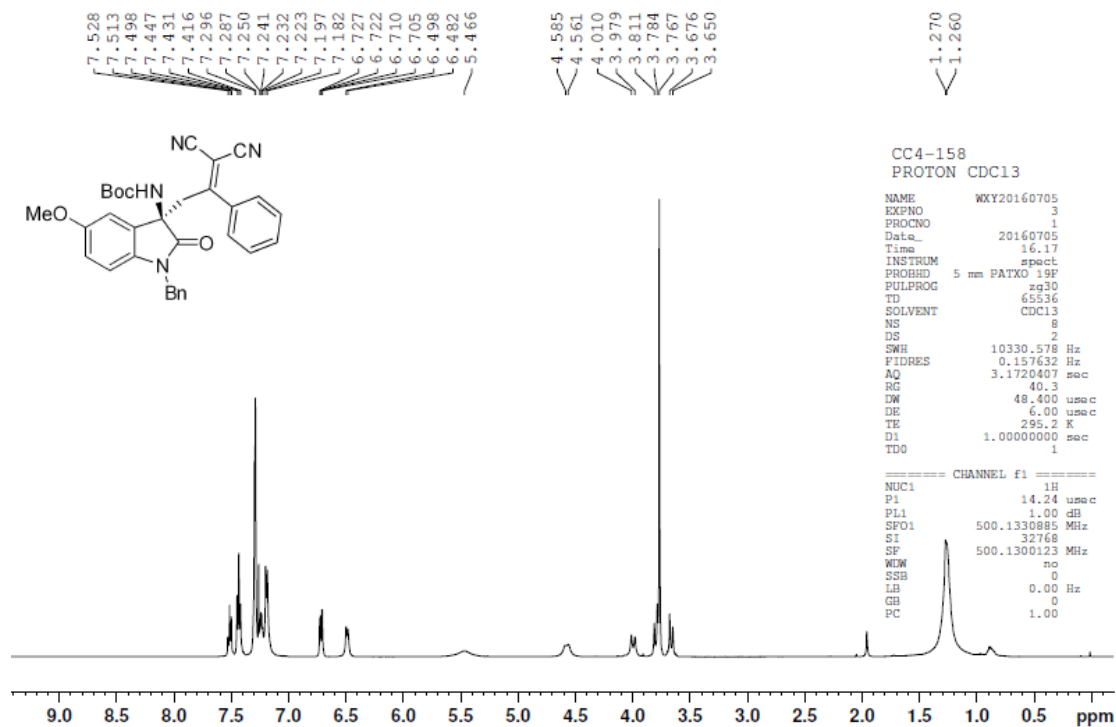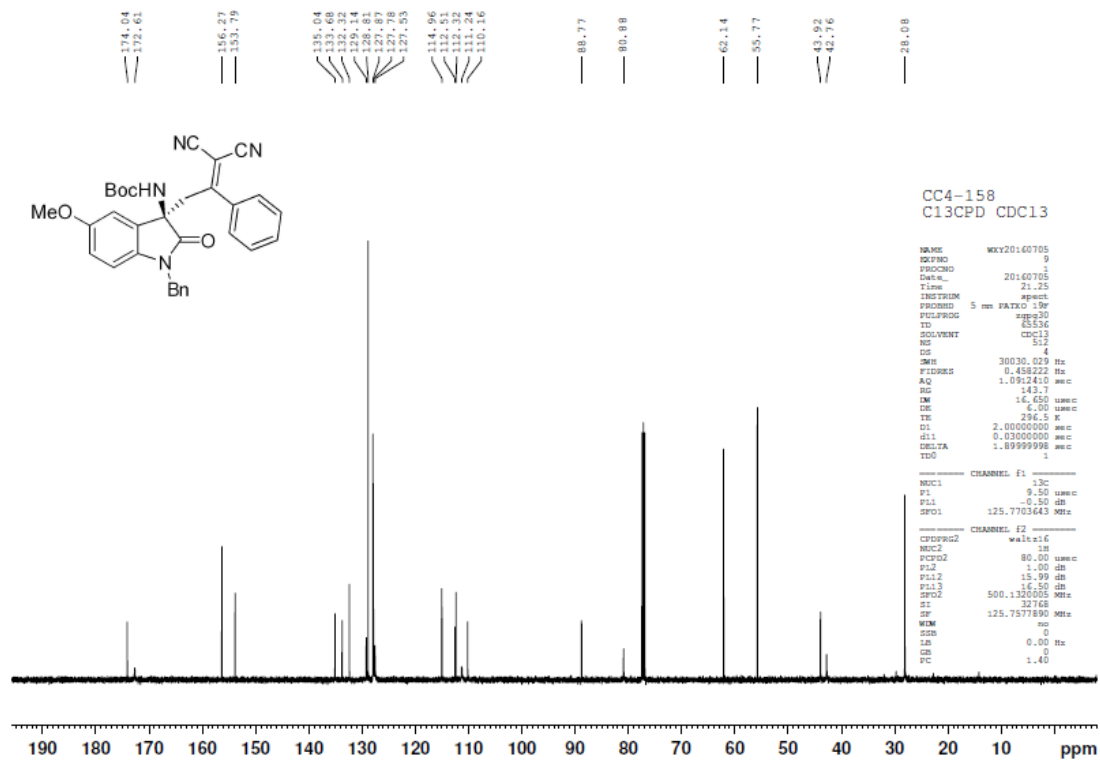

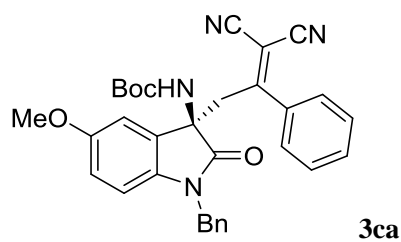

<chromatogram>

mV

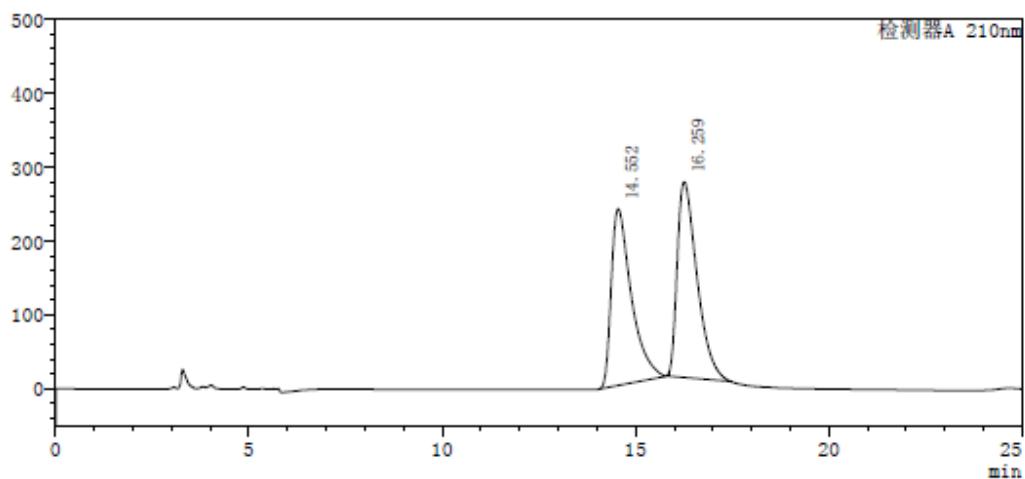

<Peak table>

检测器A 210nm

| Peak# | Ret. Time | Height | Area     | Area%   |
|-------|-----------|--------|----------|---------|
| 1     | 14.552    | 239281 | 8664264  | 47.898  |
| 2     | 16.259    | 265021 | 9424588  | 52.102  |
| 总计    |           | 504303 | 18088852 | 100.000 |

<chromatogram>

mV

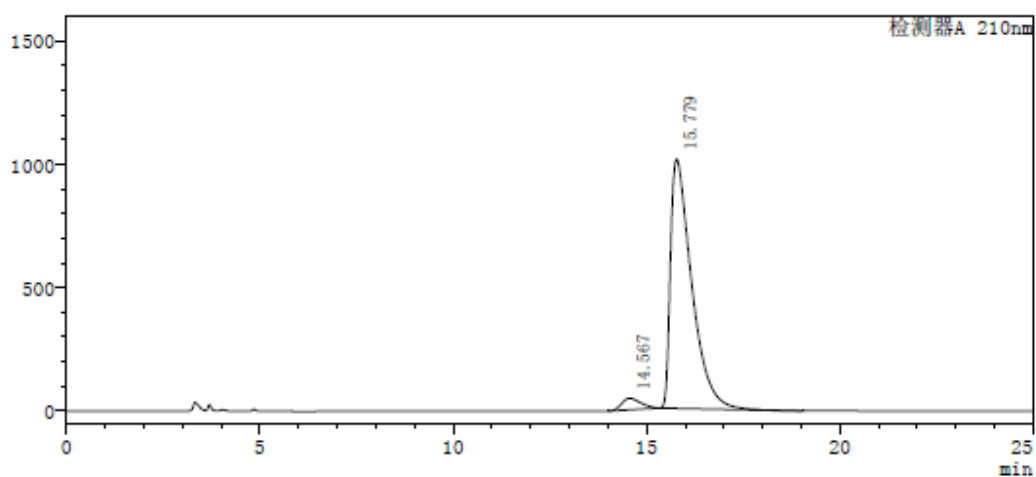

<Peak table>

检测器A 210nm

| Peak# | Ret. Time | Height  | Area     | Area%   |
|-------|-----------|---------|----------|---------|
| 1     | 14.567    | 46596   | 1604381  | 3.989   |
| 2     | 15.779    | 1011205 | 38611866 | 96.011  |
| 总计    |           | 1057801 | 40216247 | 100.000 |

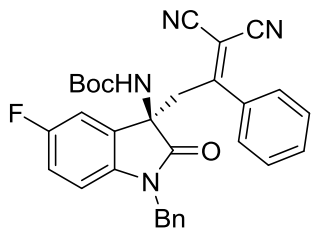

**3da**

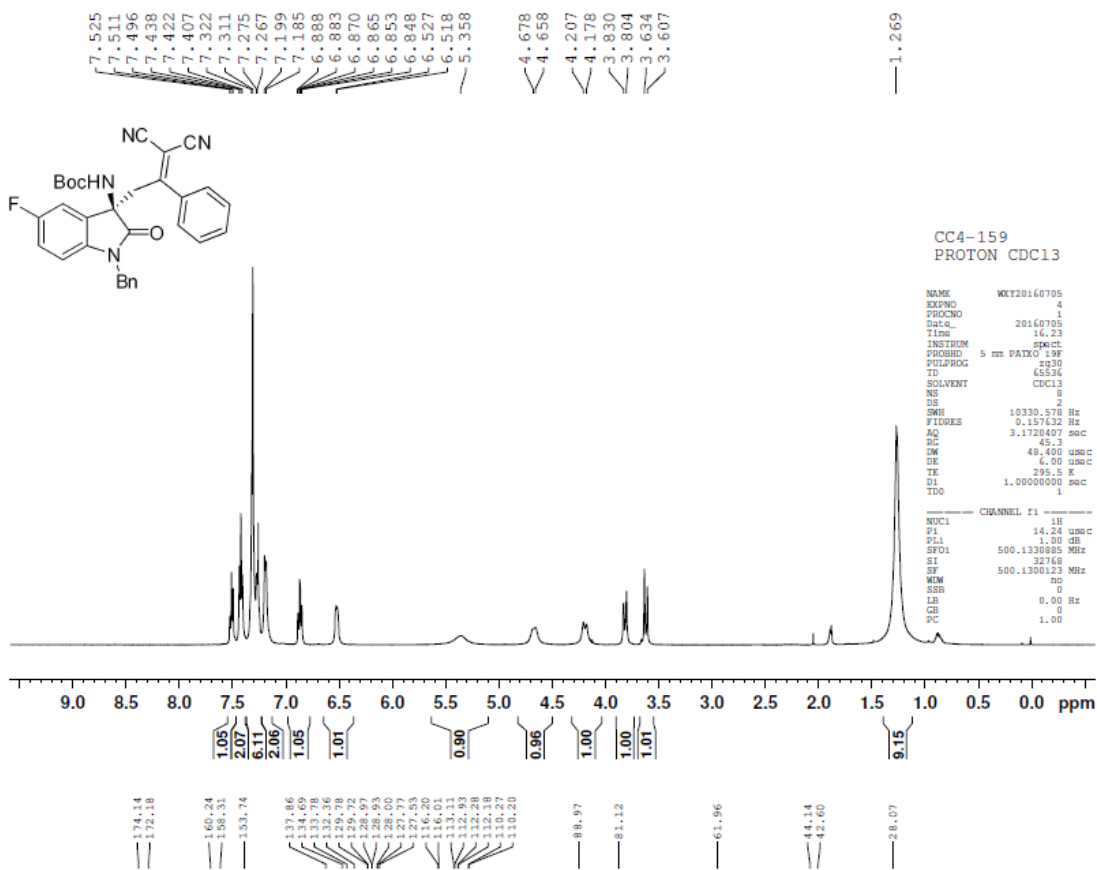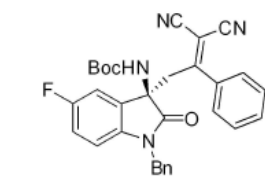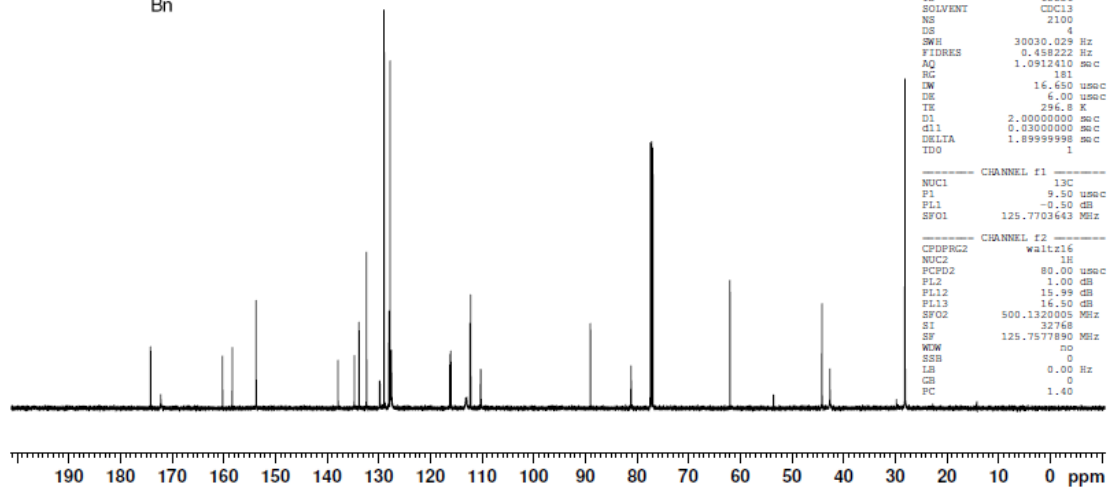



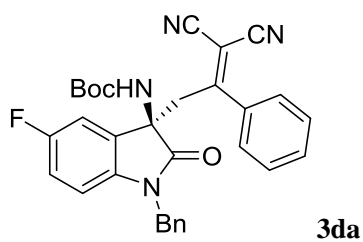

<chromatogram>

mV

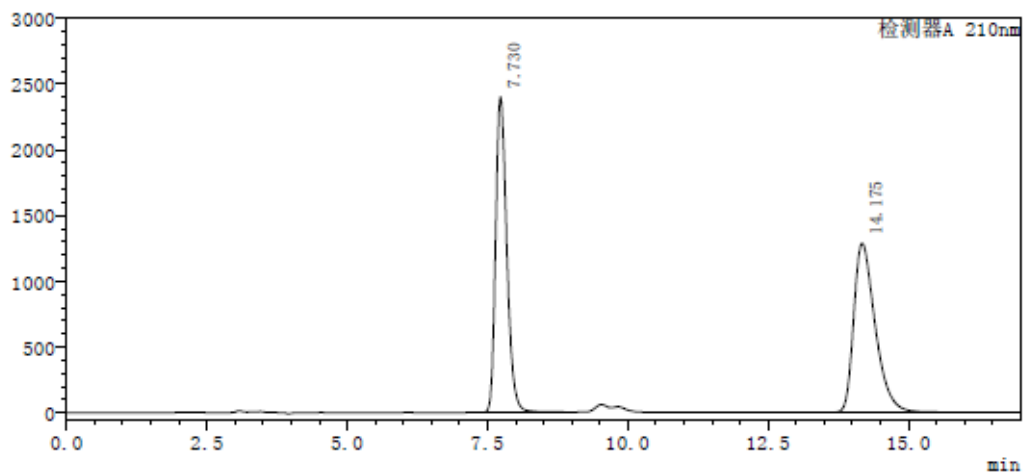

<Peak table>

检测器A 210nm

| Peak# | Ret. Time | Height  | Area     | Area%   |
|-------|-----------|---------|----------|---------|
| 1     | 7.730     | 2396383 | 33333540 | 49.254  |
| 2     | 14.175    | 1286010 | 34343365 | 50.746  |
| 总计    |           | 3682393 | 67676904 | 100.000 |

<chromatogram>

mV

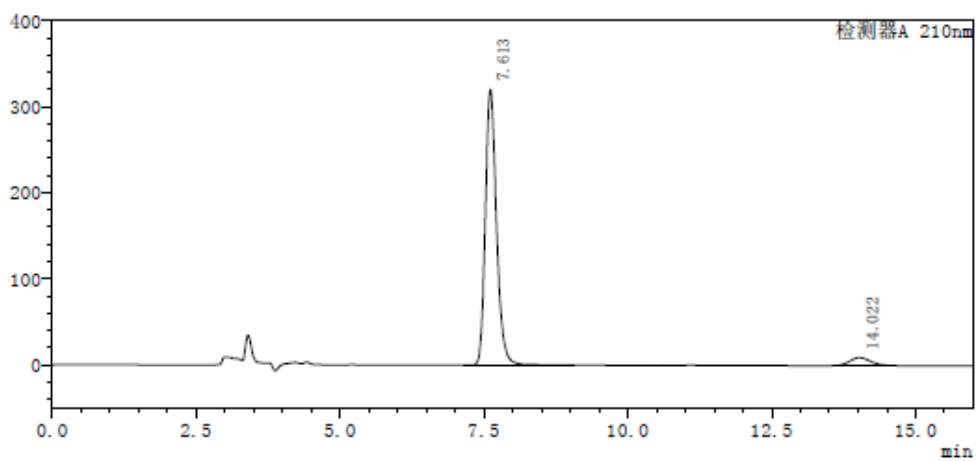

<Peak table>

检测器A 210nm

| Peak# | Ret. Time | Height | Area    | Area%   |
|-------|-----------|--------|---------|---------|
| 1     | 7.613     | 320227 | 4318539 | 94.815  |
| 2     | 14.022    | 9347   | 236177  | 5.185   |
| 总计    |           | 329574 | 4554716 | 100.000 |

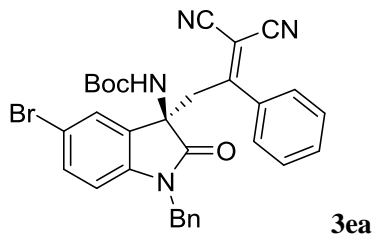

7.540  
7.518  
7.503  
7.488  
7.419  
7.404  
7.389  
7.323  
7.270  
7.267  
7.260  
7.254  
7.251  
7.152  
7.140  
6.487  
6.471

5.437

4.638

4.271

4.247

3.788

3.761

3.595

3.568

1.270

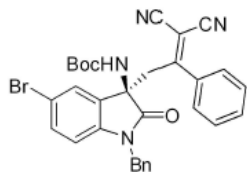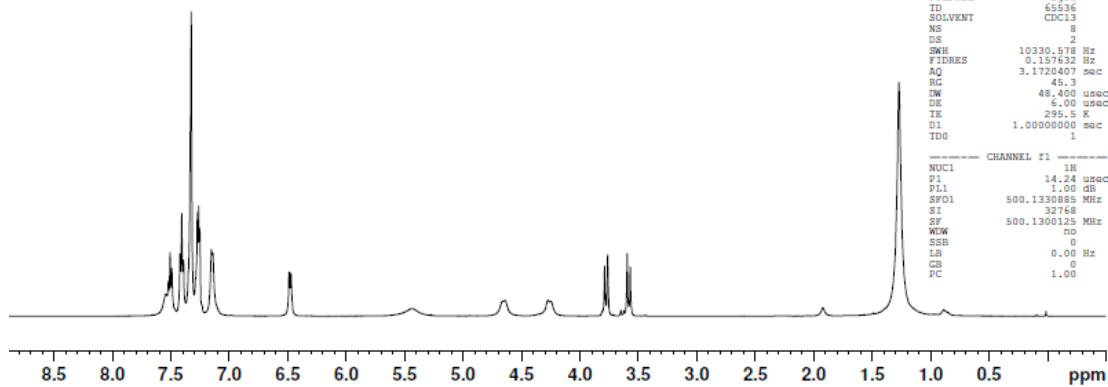

CC4-157  
PROTON CDC13

```

NAME      WXY20160705
EXPNO    2
PROCNO   1
Data     20160705
Time     16.12
INSTRUM  spect
PROBHD   5 mm PATXO 1RF
PULPROG  zg30
ID       65536
SOLVENT  CDCl3
NS       8
DS       2
SWH      10330.578 Hz
FIDRES   0.157632 Hz
AQ       3.1720407 sec
RG       45.3
RW       48.400 usec
DE       5.00 usec
TE       295.2 K
D1       1.00000000 sec
TD0      1

----- CHANNEL f1 -----
NUC1     1H
P1       14.24 usec
PL1      1.00 dB
SFO1     500.1330885 MHz
SI       32768
SF       500.1330125 MHz
WDW      no
SSB      0
LB       0.00 Hz
GB       0
CB       1.00
  
```

173.89  
171.84  
153.71  
140.96  
134.60  
133.76  
132.51  
130.02  
128.97  
128.08  
127.71  
127.71  
127.60  
116.03  
112.22  
112.18  
110.96  
89.02  
81.22  
61.72  
44.14  
42.74  
29.11

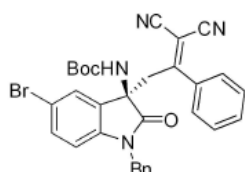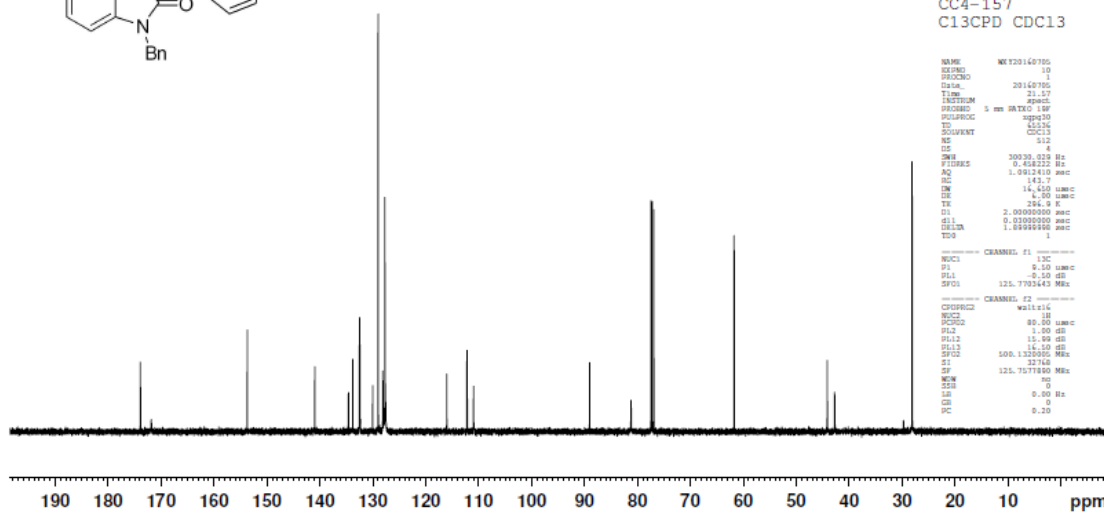

CC4-157  
C13CPD CDC13

```

NAME      WXY20160705
EXPNO    10
PROCNO   1
Data     20160705
Time     21.57
INSTRUM  spect
PROBHD   5 mm PATXO 1RF
PULPROG  zgpg30
ID       65536
SOLVENT  CDCl3
NS       4
DS       4
SWH      10030.028 Hz
FIDRES   0.454232 Hz
AQ       1.4912410 sec
RG       143.7
RW       16.500 usec
DE       4.50 usec
TE       295.2 K
D1       2.00000000 sec
d11      0.20000000 sec
DELTA    1.58999999 sec
TDR

----- CHANNEL f1 -----
NUC1     13C
P1       8.10 usec
PL1      2.50 dB
SFO1     125.7703443 MHz

----- CHANNEL f2 -----
CPDPRG2  waltz16
NUC2     1H
PCPD2    80.00 usec
PL2      1.00 dB
PL3      15.00 dB
SFO2     500.1330885 MHz
SI       32768
SF       125.7707880 MHz
WDW      no
SSB      0
LB       0.00 Hz
GB       0
CB       0.20
  
```

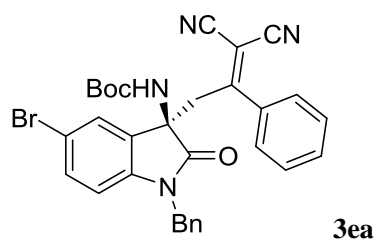

<chromatogram>

mV

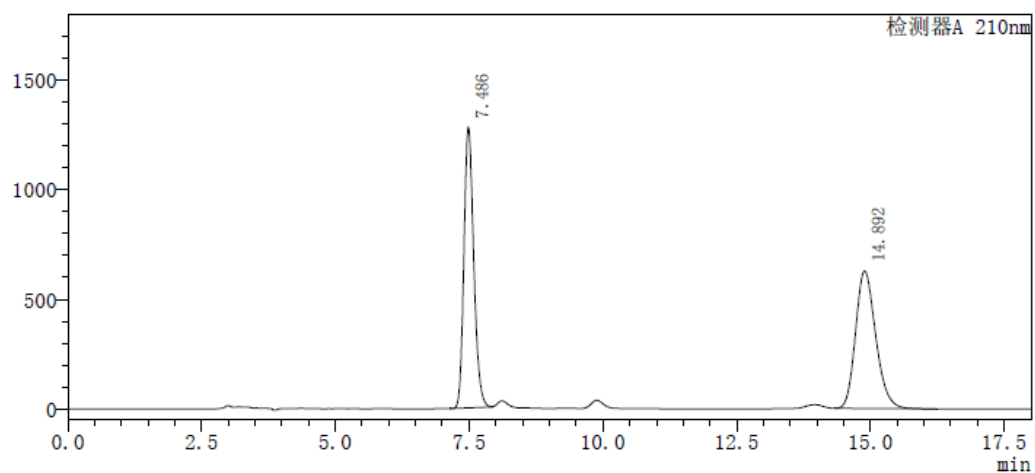

<Peak table>

检测器A 210nm

| Peak# | Ret. Time | Height  | Area     | Area%   |
|-------|-----------|---------|----------|---------|
| 1     | 7.486     | 1281295 | 16347666 | 49.769  |
| 2     | 14.892    | 628976  | 16499521 | 50.231  |
| 总计    |           | 1910271 | 32847187 | 100.000 |

<chromatogram>

mV

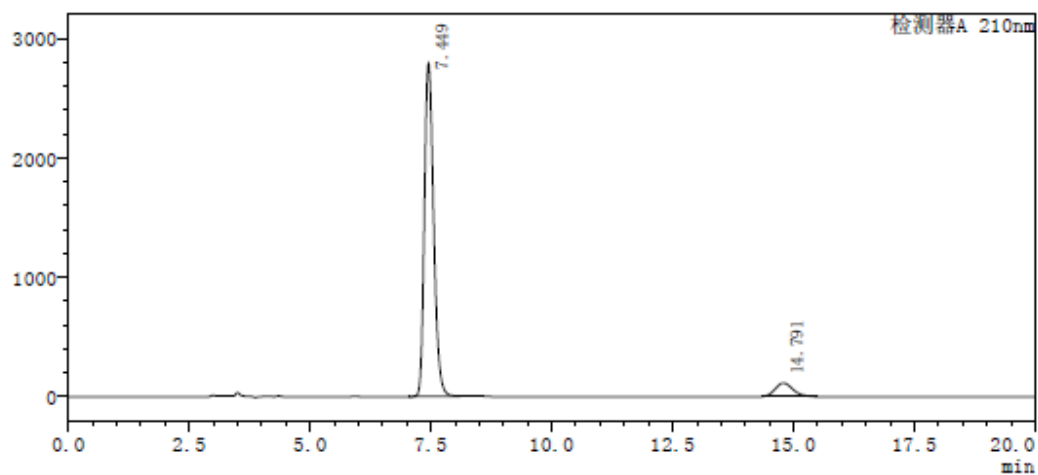

<Peak table>

检测器A 210nm

| Peak# | Ret. Time | Height  | Area     | Area%   |
|-------|-----------|---------|----------|---------|
| 1     | 7.449     | 2786946 | 37102181 | 92.546  |
| 2     | 14.791    | 115123  | 2988480  | 7.454   |
| 总计    |           | 2902068 | 40090662 | 100.000 |

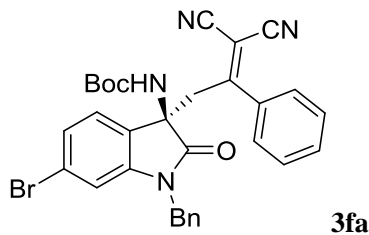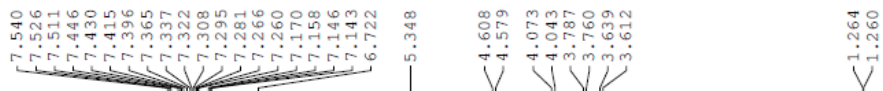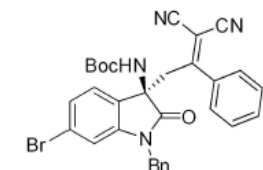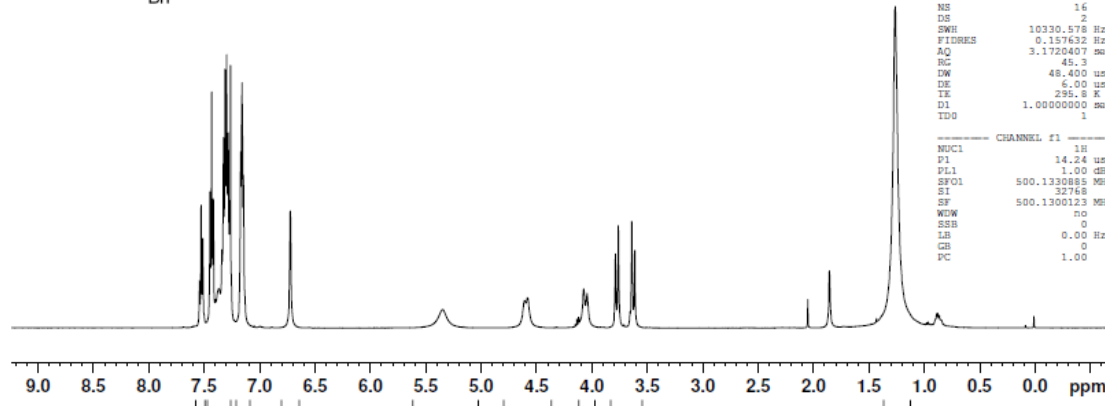

CC4-173  
 PROTON CDC13  
 NAME WXY20160715  
 EXPNO 1  
 PROCNO 1  
 Data\_ 20160715  
 Time 16.11  
 INSTRUM spect  
 PROBSH 5 mm PATXO 19F  
 PULPROG zgpg30  
 TD 65536  
 ID 65536  
 SOLVENT CDC13  
 NS 16  
 DS 2  
 SWH 10330.578 Hz  
 FIDRES 0.157632 Hz  
 AQ 3.1720407 sec  
 RG 48.3  
 RW 48.400 usec  
 DE 6.00 usec  
 TE 295.2 K  
 D1 1.00000000 sec  
 TD0 1  
 CHANNEL f1  
 NUC1 1H  
 P1 14.24 usec  
 PL1 1.00 dB  
 SFO1 500.1330885 MHz  
 SI 32768  
 SF 500.1330123 MHz  
 WDW no  
 SSB 0  
 LB 0.0 Hz  
 GB 0  
 PC 1.00

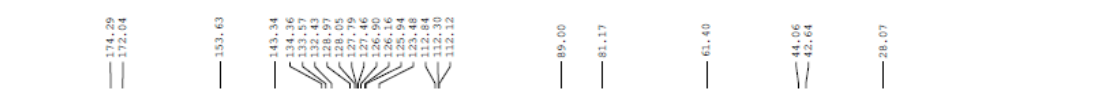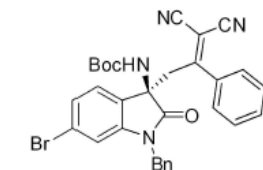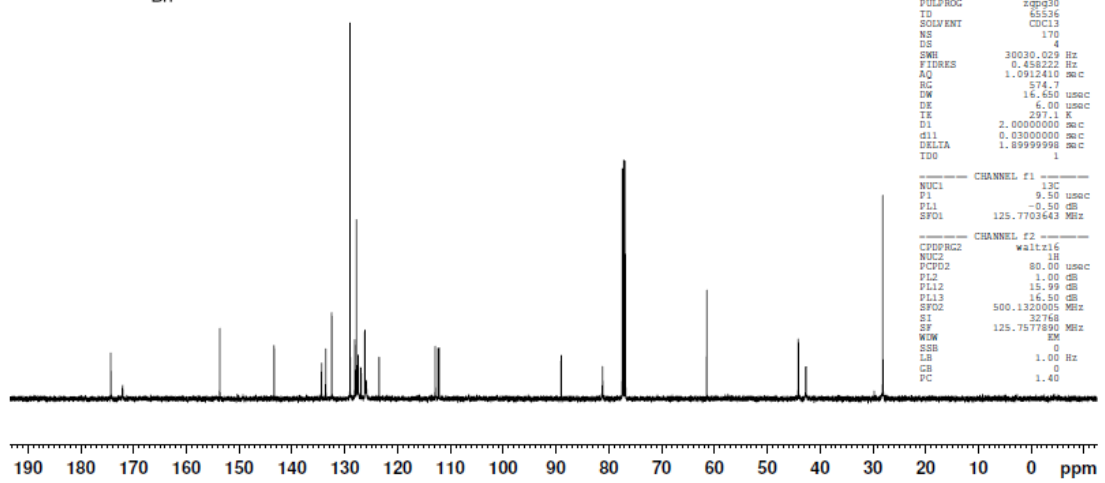

CC4-173  
 C13CPD CDC13  
 NAME WXY20160715  
 EXPNO 2  
 PROCNO 1  
 Data\_ 20160715  
 Time 16.19  
 INSTRUM spect  
 PROBSH 5 mm PATXO 19F  
 PULPROG zgpg30  
 TD 65536  
 ID 65536  
 SOLVENT CDC13  
 NS 170  
 DS 4  
 SWH 30030.029 Hz  
 FIDRES 0.458222 Hz  
 AQ 1.9912410 sec  
 RG 574.7  
 RW 16.650 usec  
 DE 6.00 usec  
 TE 297.1 K  
 D1 2.00000000 sec  
 d11 0.03000000 sec  
 DELTA 1.89999998 sec  
 TD0 1  
 CHANNEL f1  
 NUC1 13C  
 P1 9.50 usec  
 PL1 -0.50 dB  
 SFO1 125.7703643 MHz  
 CHANNEL f2  
 CPDPRG2 waltz16  
 NUC2 1H  
 PCPD2 80.00 usec  
 PL2 1.00 dB  
 PL12 15.99 dB  
 PL13 16.50 dB  
 SFO2 500.1320005 MHz  
 SI 32768  
 SF 125.7577890 MHz  
 WDW EM  
 SSB 0  
 LB 1.00 Hz  
 GB 0  
 PC 1.40

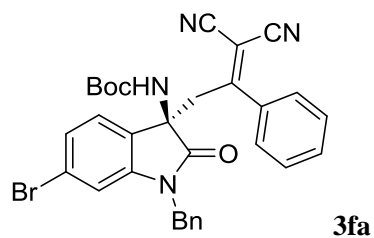

<chromatogram>

mV

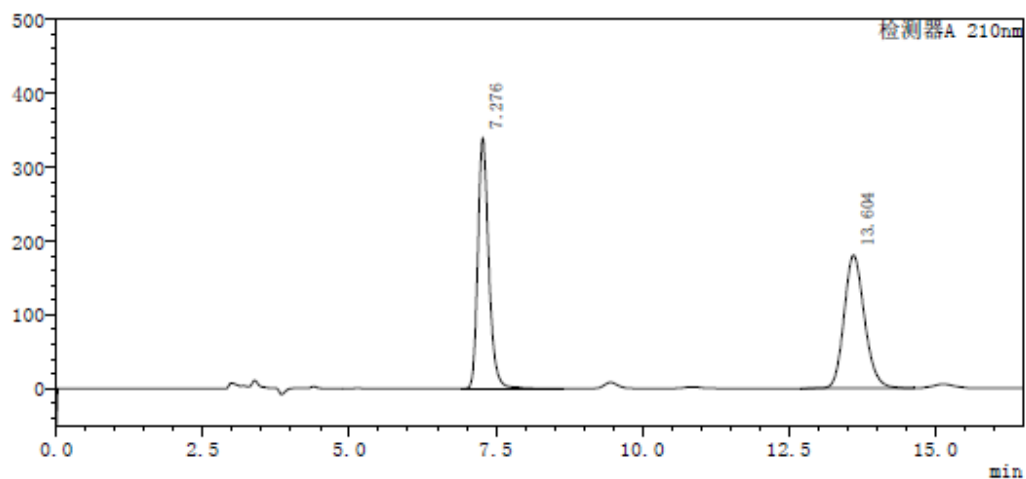

<Peak table>

检测器A 210nm

| Peak# | Ret. Time | Height | Area    | Area%   |
|-------|-----------|--------|---------|---------|
| 1     | 7.276     | 338853 | 4392437 | 50.173  |
| 2     | 13.604    | 179972 | 4362124 | 49.827  |
| 总计    |           | 518825 | 8754561 | 100.000 |

<chromatogram>

mV

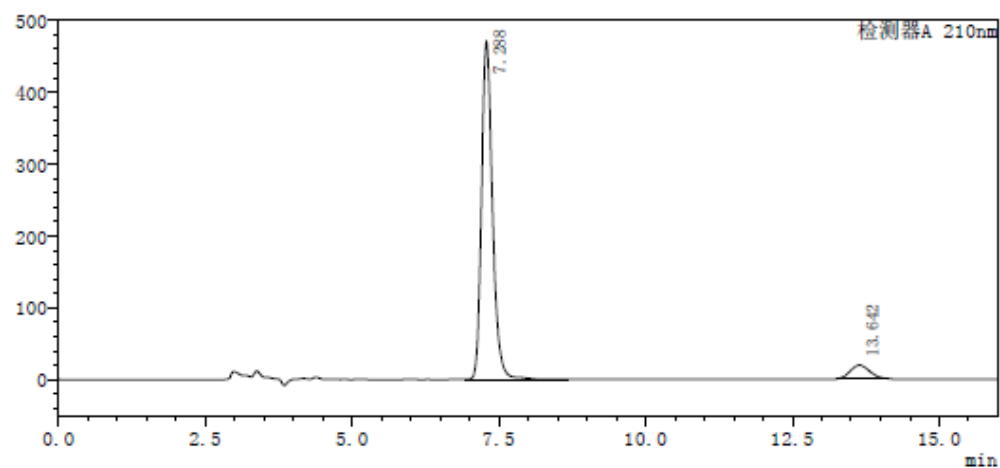

<Peak table>

检测器A 210nm

| Peak# | Ret. Time | Height | Area    | Area%   |
|-------|-----------|--------|---------|---------|
| 1     | 7.288     | 470186 | 6116152 | 93.364  |
| 2     | 13.642    | 18868  | 434736  | 6.636   |
| 总计    |           | 489055 | 6550888 | 100.000 |

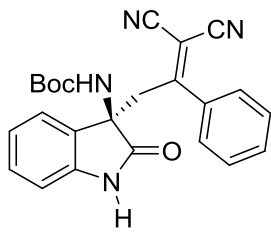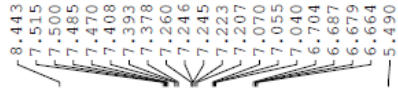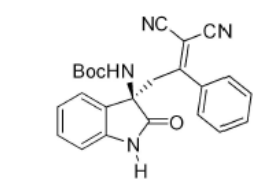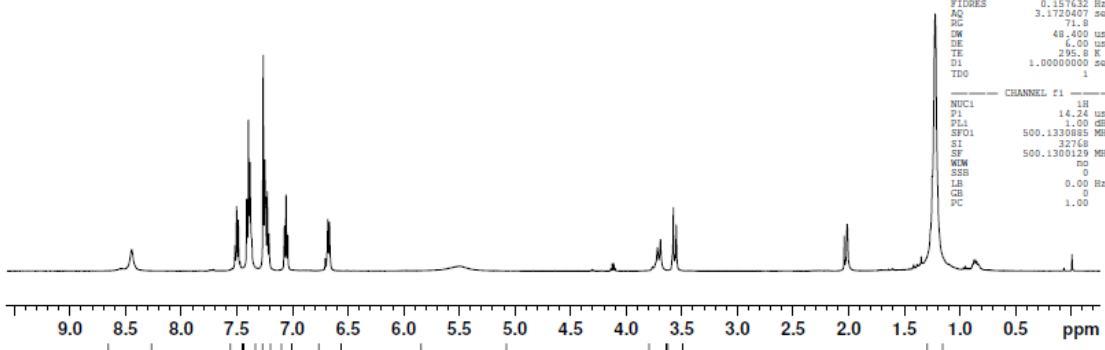

CC4-145  
PROTON CDC13

```

NAME      WKY20160701
EXPNO     5
PROCNO    1
Date_     20160701
Time      16.21
INSTRUM   spect
PROBHD    5 mm PATAI 19F
PULPROG   zgpg30
TD         65536
SOLVENT   CDCl3
NS         8
DS         2
SWH        10330.578 Hz
FIDRES     0.157622 Hz
AQ         3.1720407 sec
RG         71.8
CW         48.400 usec
DE         6.00 usec
TE         295.8 K
D1         1.00000000 sec
TD0        1
----- CHANNEL f1 -----
NUC1      1H
P1        14.24 usec
PL1       1.00 dB
SFO1      500.1330885 MHz
SI        32768
SF        500.1300129 MHz
WVW       no
SSB       0
LB        0.00 Hz
GB        0
PC        1.00

```

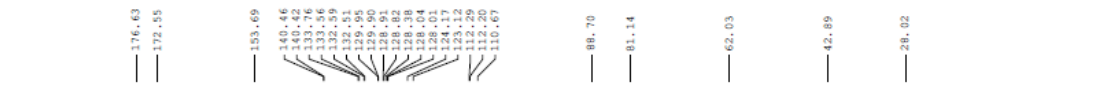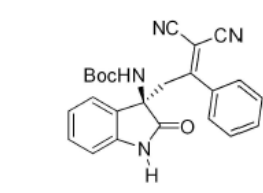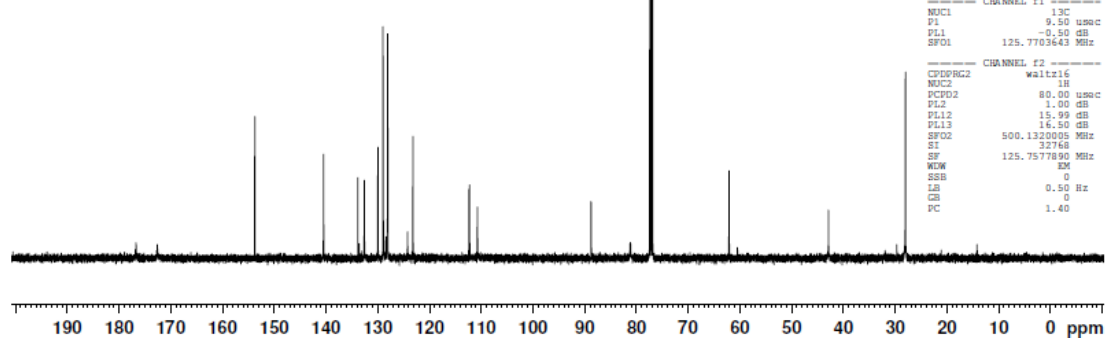

CC4-145  
C13CPD CDC13

```

NAME      WKY20160703
EXPNO     10
PROCNO    1
Date_     20160703
Time      8.17
INSTRUM   spect
PROBHD    5 mm PATAI 19F
PULPROG   zgpg30
TD         65536
SOLVENT   CDCl3
NS         4
DS         4
SWH        30030.029 Hz
FIDRES     0.458222 Hz
AQ         1.0912410 sec
RG         128
CW         16.650 usec
DE         6.00 usec
TE         297.0 K
D1         2.00000000 sec
d11        0.03000000 sec
DELTA     1.89999998 sec
TD0        1
----- CHANNEL f1 -----
NUC1      13C
P1         9.50 usec
PL1       -0.50 dB
SFO1      125.7703643 MHz
----- CHANNEL f2 -----
CPDPRG2   waltz16
NUC2      1H
PCPD2     80.00 usec
PL2        1.00 dB
PL12     15.99 dB
PL13     15.50 dB
SFO2     500.1320005 MHz
SI        32768
SF        125.7577890 MHz
WVW       EM
SSB       0
LB        0.58 Hz
GB        0
PC        1.40

```

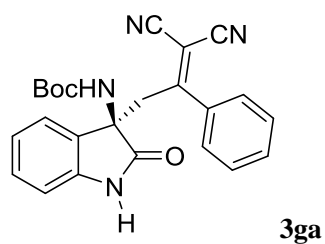

<chromatogram>

mV

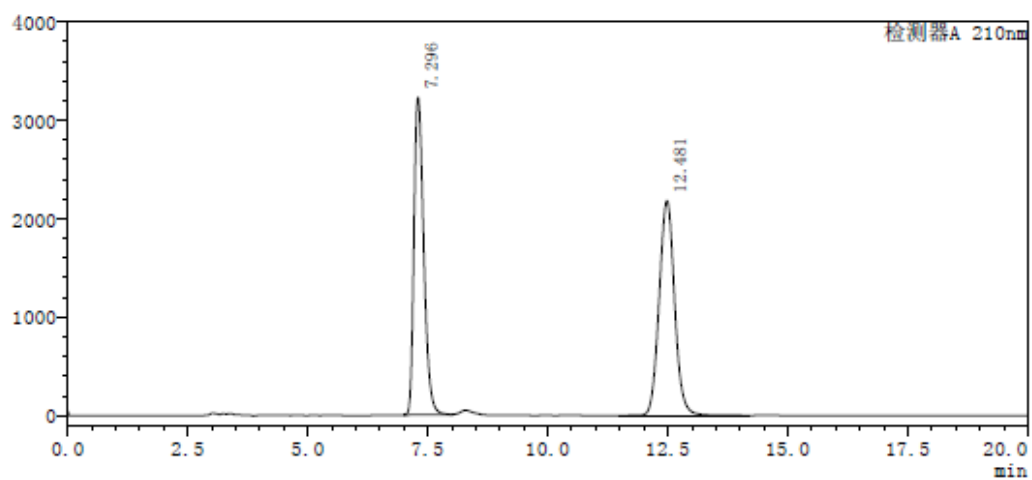

<Peak table>

检测器A 210nm

| Peak# | Ret. Time | Height  | Area     | Area%   |
|-------|-----------|---------|----------|---------|
| 1     | 7.296     | 3224678 | 45874272 | 48.360  |
| 2     | 12.481    | 2183219 | 48986637 | 51.640  |
| 总计    |           | 5407897 | 94860909 | 100.000 |

<chromatogram>

mV

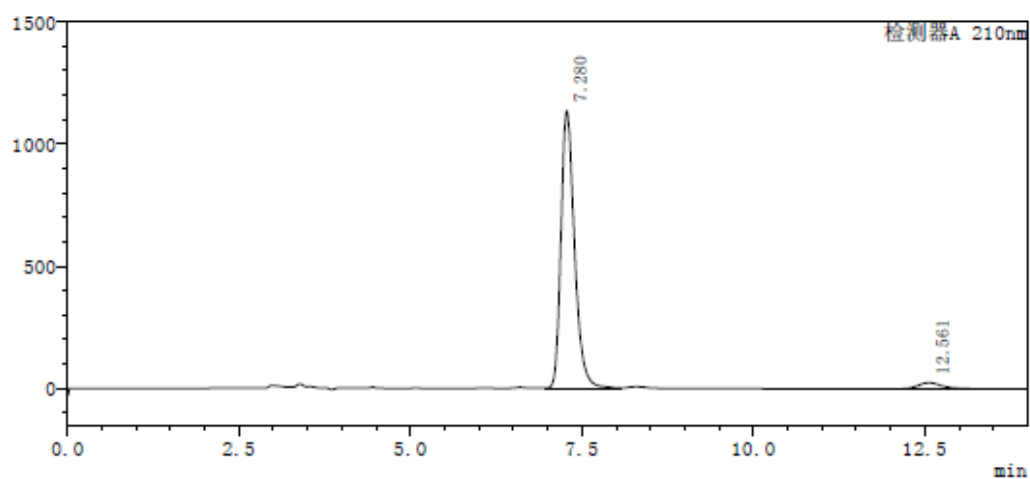

<Peak table>

检测器A 210nm

| Peak# | Ret. Time | Height  | Area     | Area%   |
|-------|-----------|---------|----------|---------|
| 1     | 7.280     | 1134055 | 15549251 | 96.190  |
| 2     | 12.561    | 25421   | 615907   | 3.810   |
| 总计    |           | 1159476 | 16165157 | 100.000 |

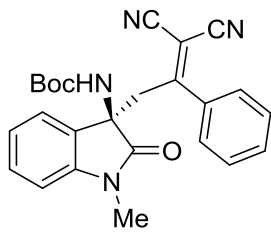

7.583  
7.519  
7.503  
7.489  
7.442  
7.427  
7.412  
7.364  
7.349  
7.347  
7.334  
7.332  
7.172  
7.157  
7.141  
7.126  
6.687  
6.671

5.138

3.735  
3.709  
3.613  
3.586

2.670

1.213

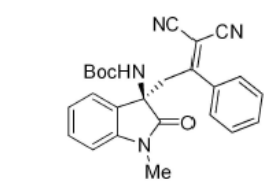

CC4-141  
PROTON CDC13

```

NAME      WXY20160630
EXPNO    5
PROCNO   1
Date_    20160630
Time     16.26
INSTRUM  spect
PROBHD   5 mm PATXO 19F
PULPROG  zg30
TD        65536
SOLVENT  CDC13
NS        16
DS        2
SWH       10330.578 Hz
FIDRES   0.157632 Hz
AQ        3.1720407 sec
RG        181
DW        48.400 usec
DE        6.00 usec
TE        295.6 K
D1        1.0000000 sec
TDO       1
  
```

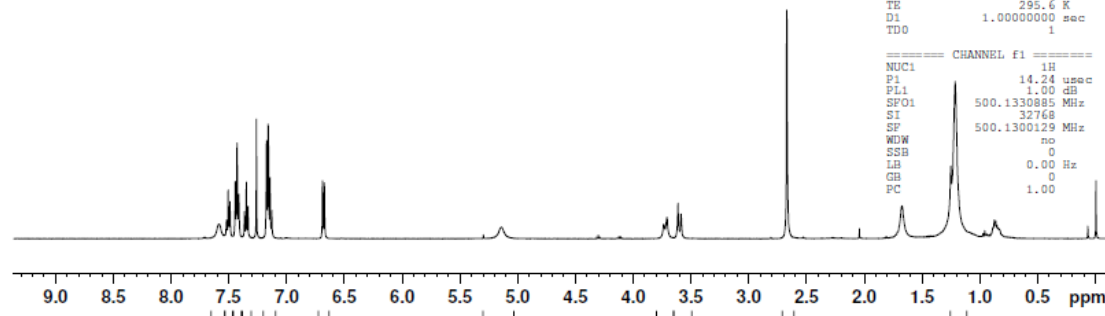

0.92  
1.15  
2.13  
1.11  
3.15

1.04

0.97

1.01  
1.07

3.08

9.50

173.93  
172.50  
153.51  
142.79  
133.29  
132.40  
130.02  
128.79  
127.89  
127.33  
123.31  
112.32  
112.16  
108.50  
88.75  
80.89  
61.65  
42.65  
28.01  
21.94

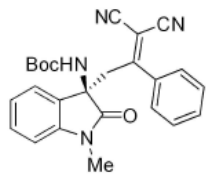

CC4-141  
C13CPD CDC13

```

NAME      WXY20160703
EXPNO    1
PROCNO   1
Date_    20160703
Time     13.54
INSTRUM  spect
PROBHD   5 mm PATXO 19F
PULPROG  zgpg30
TD        65536
SOLVENT  CDC13
NS        2100
DS        4
SWH       30030.029 Hz
FIDRES   0.459222 Hz
AQ        1.0024010 sec
RG        128
DW        16.000 usec
DE        6.00 usec
TE        297.4 K
D1        2.0000000 sec
d11       0.0300000 sec
DELTA    1.8999999 sec
TDO       1
  
```

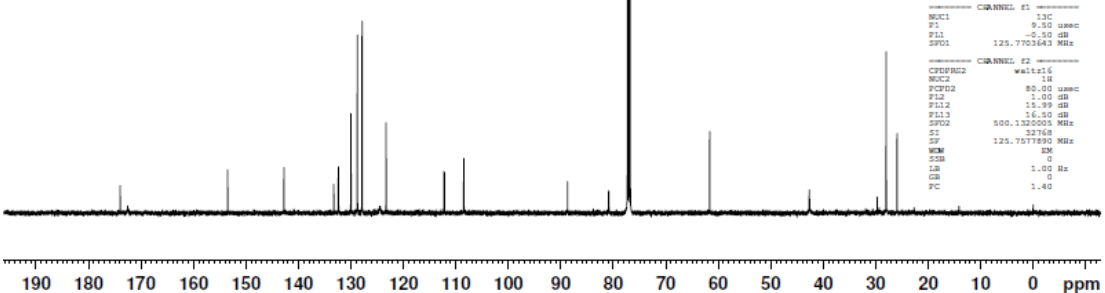

```

CHANNEL F1
NUC1     13C
P1        9.50 usec
PL1       -2.50 dB
SFO1     125.7654643 MHz

CHANNEL F2
CPDPRG2  waltz16
NUC2     13C
FPCPD2   80.00 usec
PL2       1.00 dB
PL12     15.99 dB
PL13     16.50 dB
SFO2     500.1320000 MHz
SI        32768
SF        125.7679000 MHz
WDW       EM
SSB       0
LB        1.00 Hz
GB        0
PC        1.40
  
```



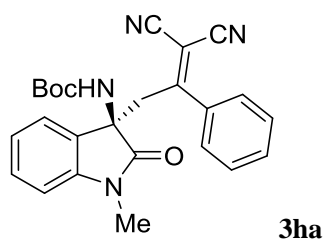

<chromatogram>

mV

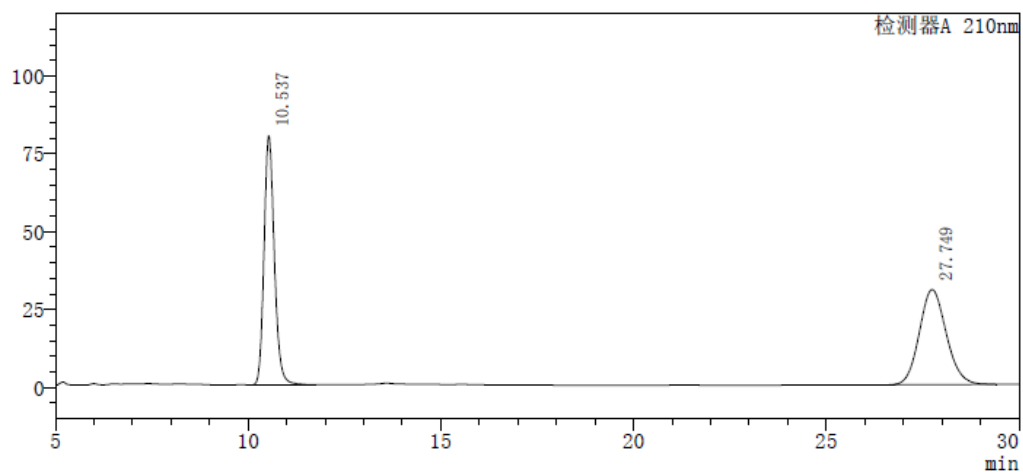

<Peak table>

检测器A 210nm

| Peak# | Ret. Time | Height | Area    | Area%   |
|-------|-----------|--------|---------|---------|
| 1     | 10.537    | 79907  | 1487308 | 50.047  |
| 2     | 27.749    | 30528  | 1484537 | 49.953  |
| 总计    |           | 110435 | 2971845 | 100.000 |

<chromatogram>

mV

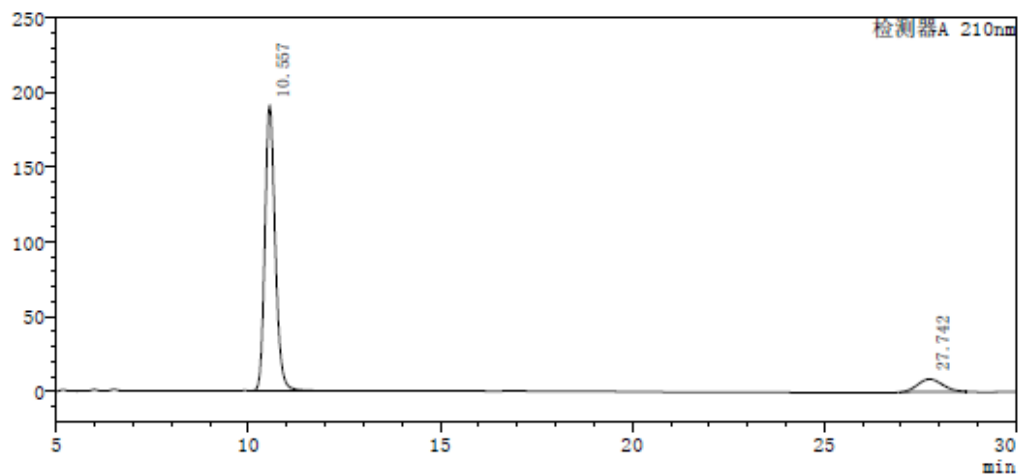

<Peak table>

检测器A 210nm

| Peak# | Ret. Time | Height | Area    | Area%   |
|-------|-----------|--------|---------|---------|
| 1     | 10.557    | 190750 | 3568145 | 90.199  |
| 2     | 27.742    | 8575   | 387698  | 9.801   |
| 总计    |           | 199325 | 3955843 | 100.000 |

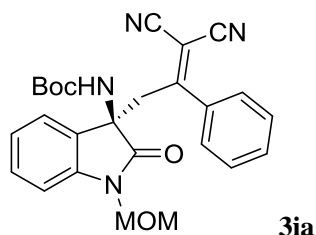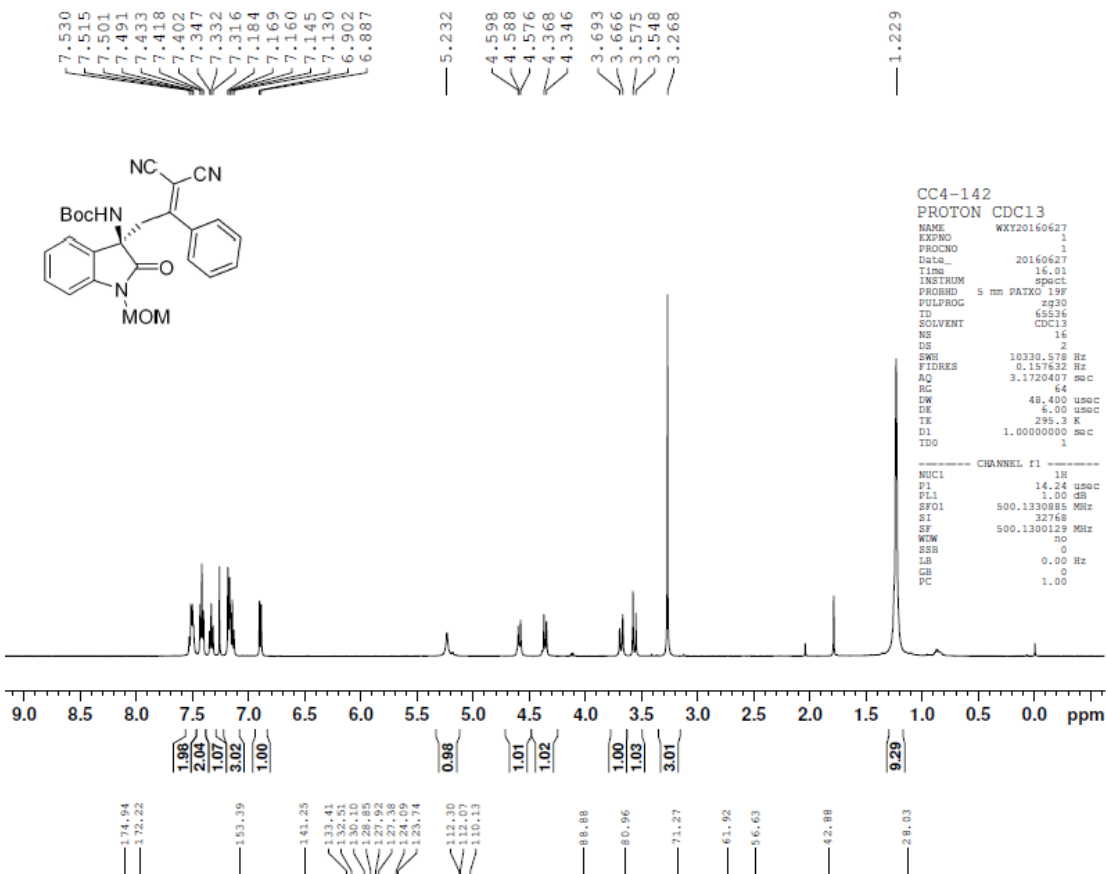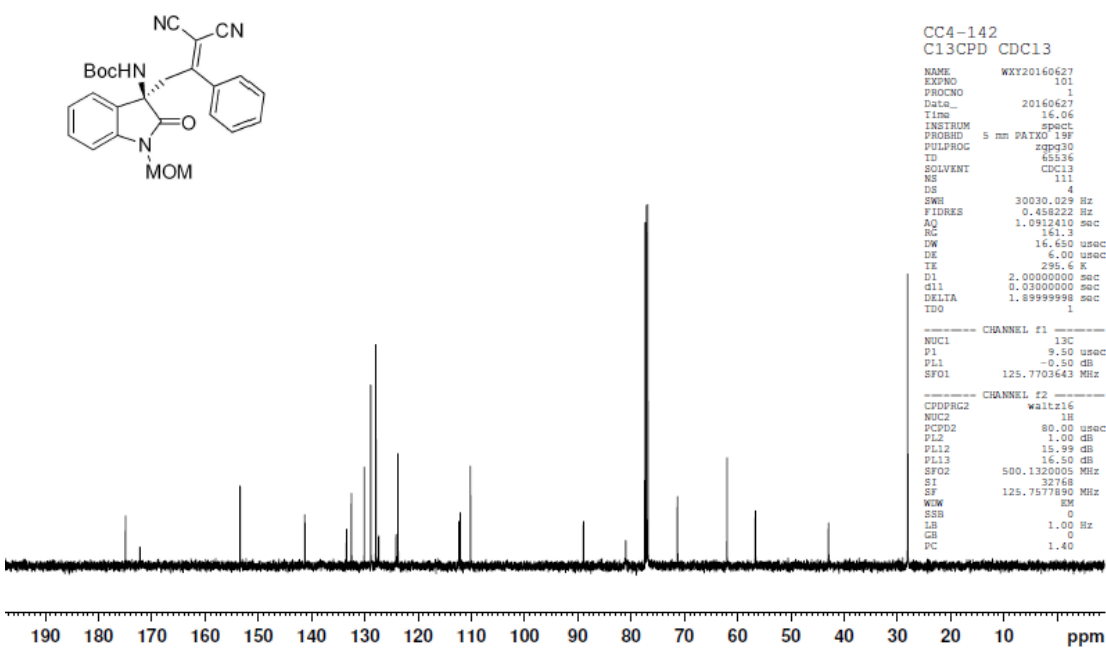

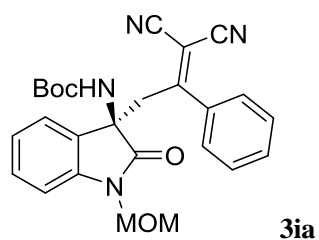

<chromatogram>

mV

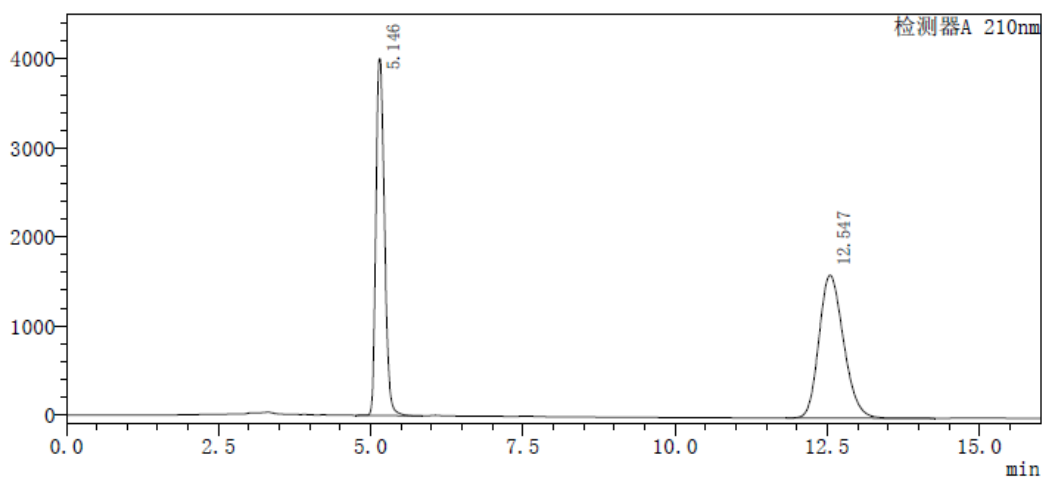

<Peak table>

检测器A 210nm

| Peak# | Ret. Time | Height  | Area     | Area%   |
|-------|-----------|---------|----------|---------|
| 1     | 5.146     | 4008042 | 39224109 | 46.481  |
| 2     | 12.547    | 1605132 | 45163335 | 53.519  |
| 总计    |           | 5613174 | 84387444 | 100.000 |

<chromatogram>

mV

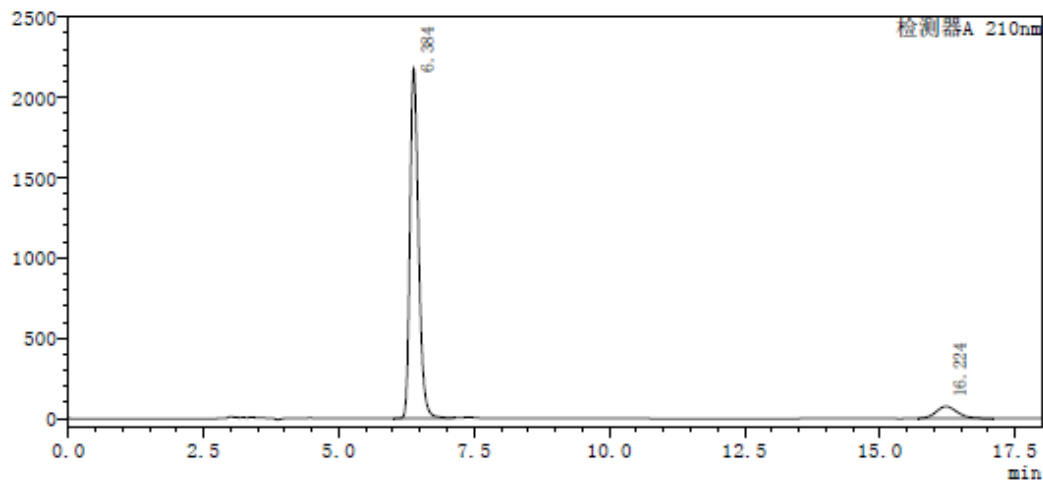

<Peak table>

检测器A 210nm

| Peak# | Ret. Time | Height  | Area     | Area%   |
|-------|-----------|---------|----------|---------|
| 1     | 6.384     | 2175544 | 24037110 | 92.370  |
| 2     | 16.224    | 73761   | 1985390  | 7.630   |
| 总计    |           | 2249304 | 26022500 | 100.000 |

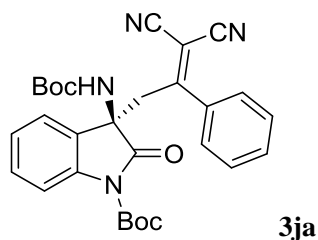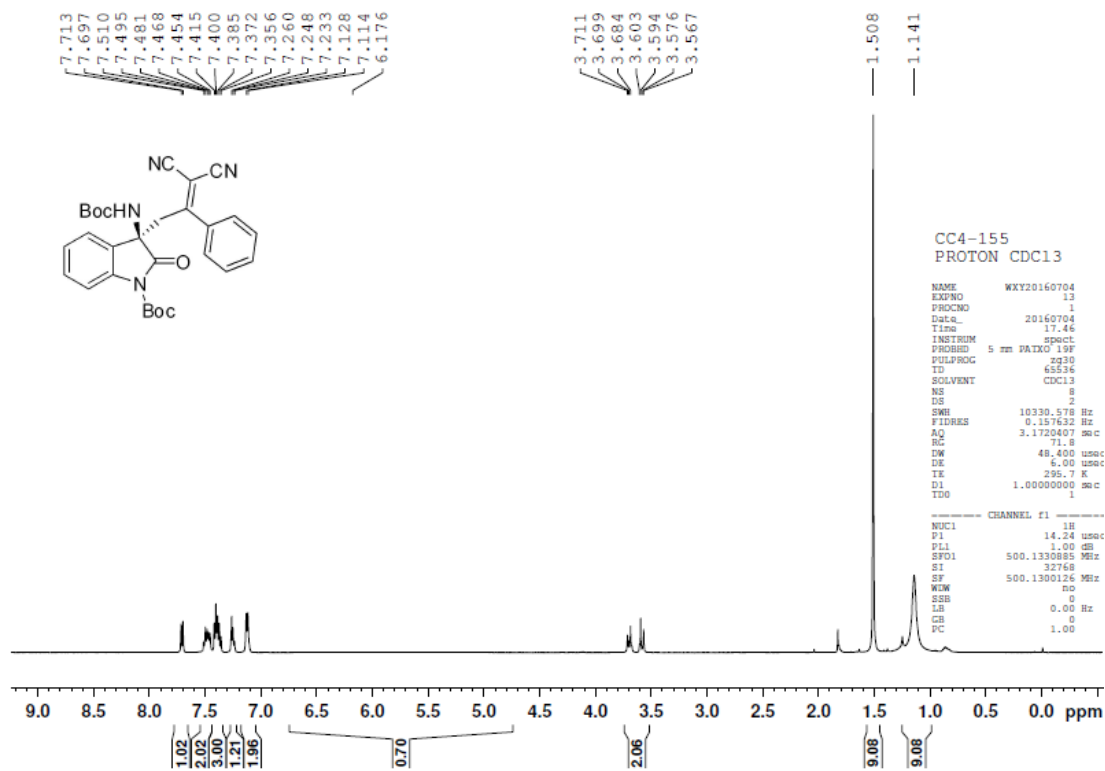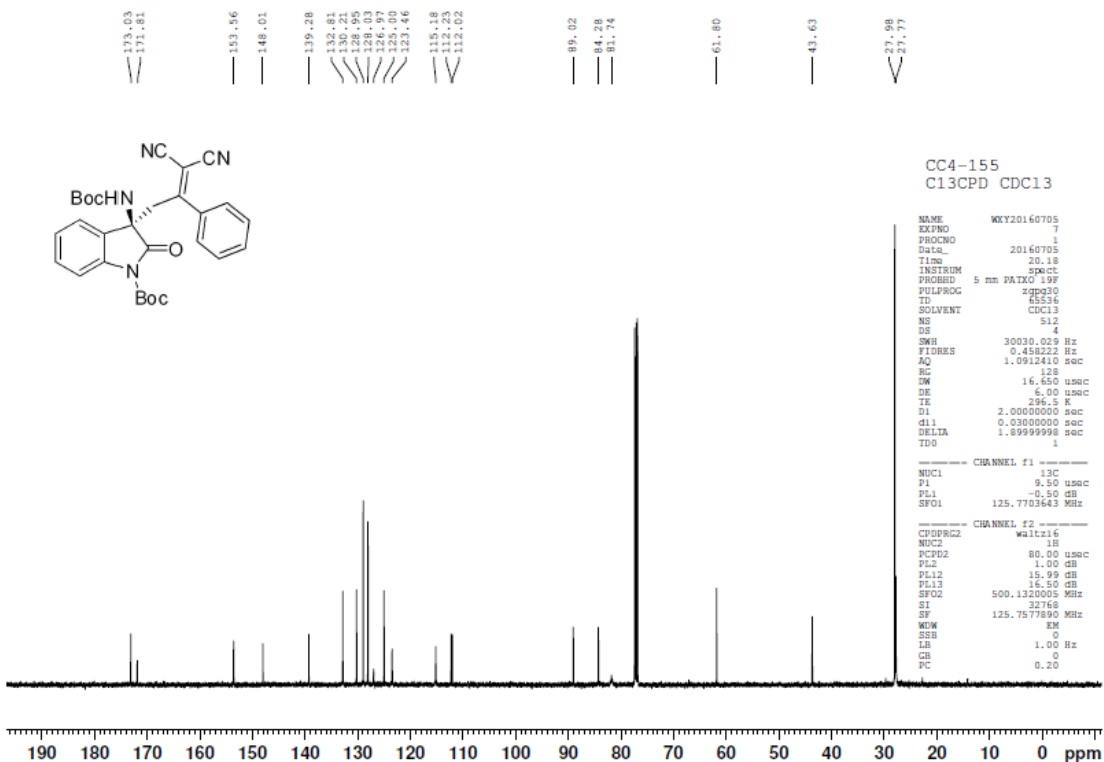

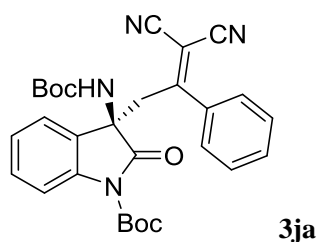

<chromatogram>

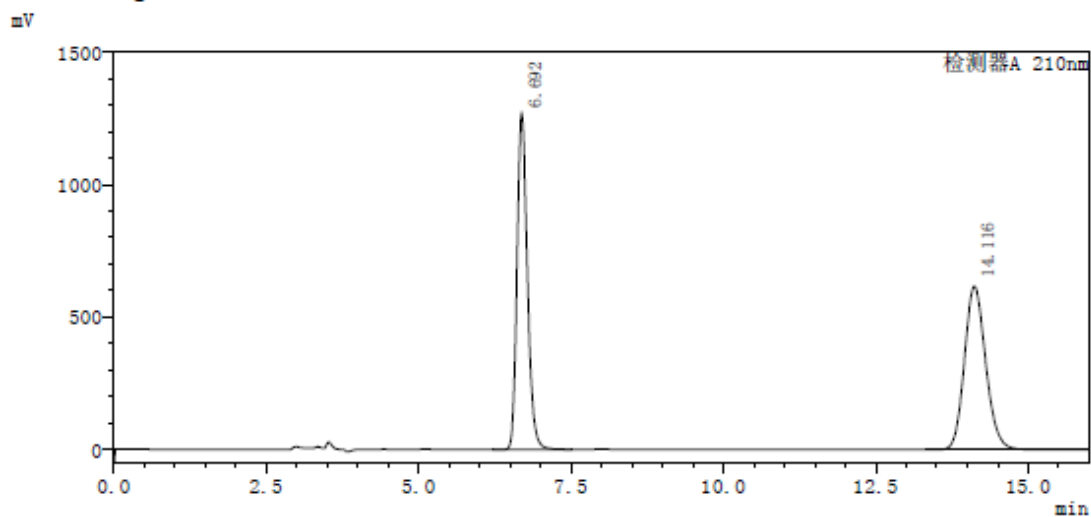

<Peak table>

检测器A 210nm

| Peak# | Ret. Time | Height  | Area     | Area%   |
|-------|-----------|---------|----------|---------|
| 1     | 6.692     | 1268902 | 14980884 | 49.935  |
| 2     | 14.116    | 617644  | 15019665 | 50.065  |
| 总计    |           | 1886546 | 30000549 | 100.000 |

<chromatogram>

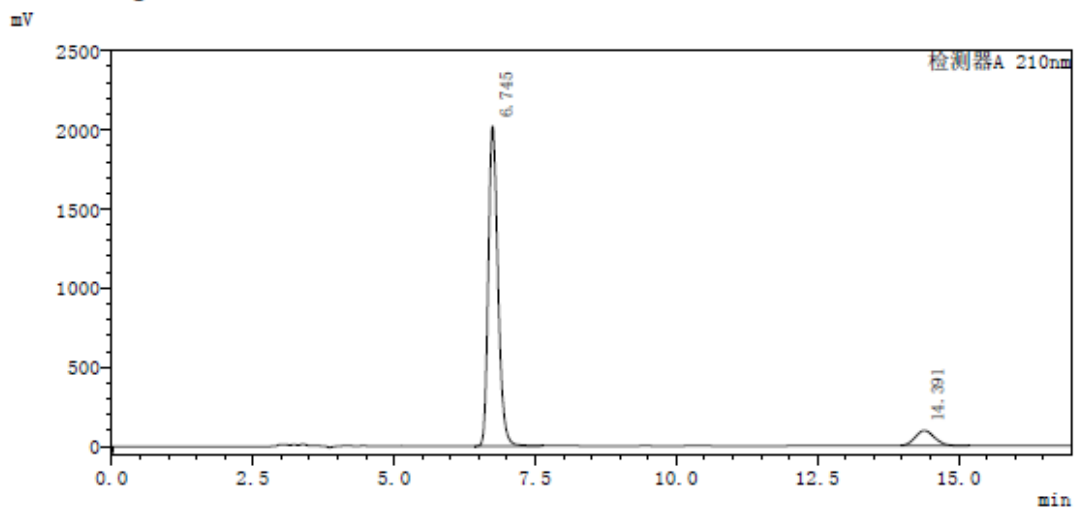

<Peak table>

检测器A 210nm

| Peak# | Ret. Time | Height  | Area     | Area%   |
|-------|-----------|---------|----------|---------|
| 1     | 6.745     | 2019088 | 23949156 | 91.302  |
| 2     | 14.391    | 95576   | 2281529  | 8.698   |
| 总计    |           | 2114664 | 26230685 | 100.000 |

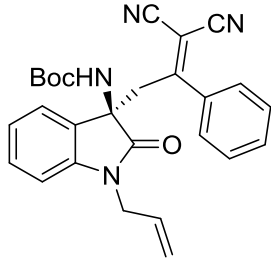

**3ka**

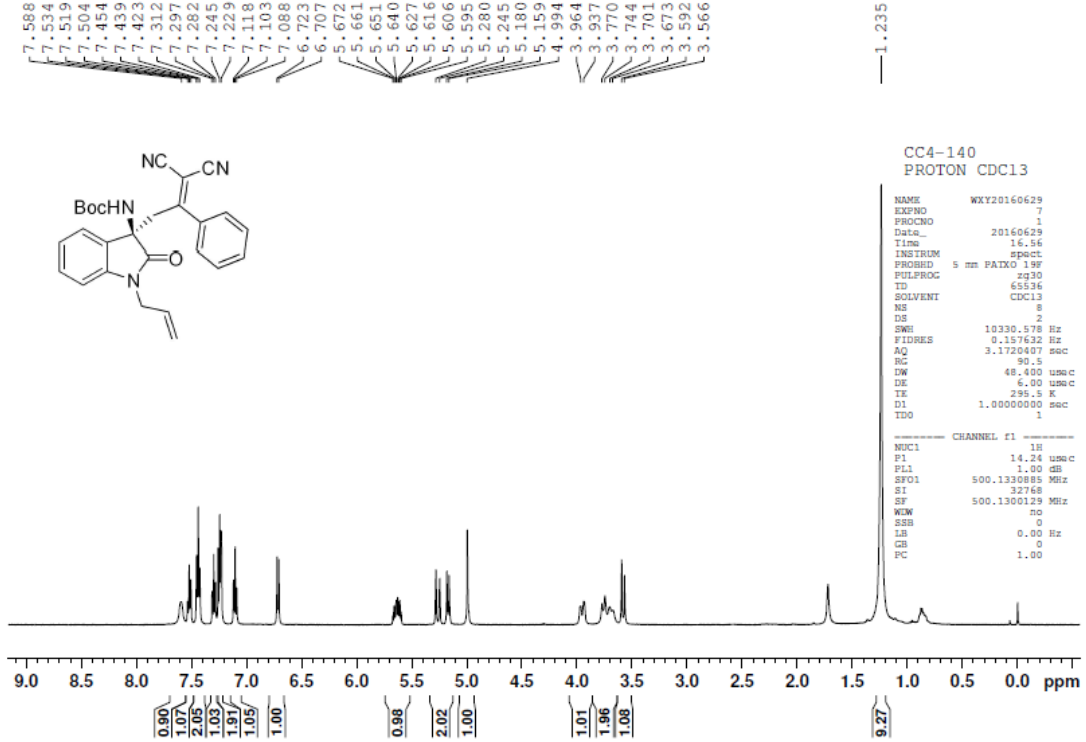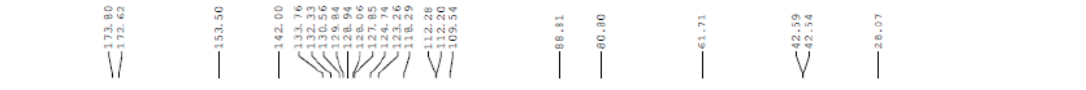

```

CC4-140
PROTON CDC13
NAME WXY20160629
EXPNO 7
PROCNO 1
Date_ 20160629
Time 16.56
INSTRUM spect
PROBHD 5 mm PATEO 19F
PULPROG zgpg30
ID 65536
SOLVENT CDC13
NS 8
DS 2
SWH 10330.578 Hz
FIDRES 0.157632 Hz
AQ 3.1720407 sec
RG 90.5
SW 48.400 usec
DE 6.00 usec
TE 295.5 K
D1 1.00000000 sec
TD 1
----- CHANNEL f1 -----
NUC1 1H
P1 14.24 usec
PL1 0.00 dB
SFO1 500.1330885 MHz
SI 32768
SF 500.1330129 MHz
WDW sc
SSB 0
LB 0.00 Hz
GB 0
PC 1.00

```

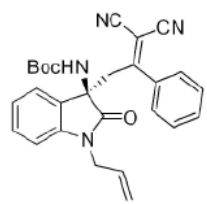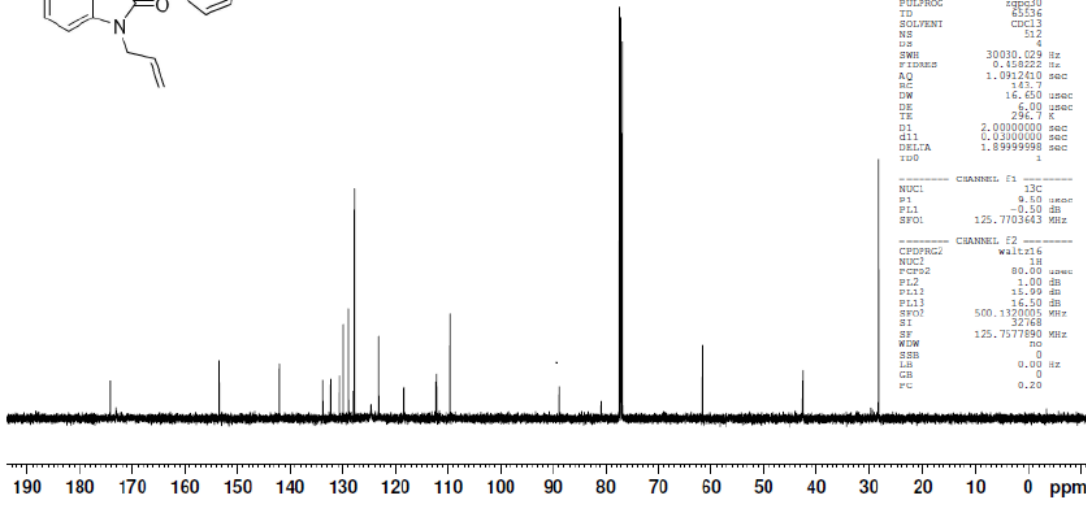

```

CC4-140
C13CPD CDC13
NAME WXY20160629
EXPNO 107
PROCNO 1
Date_ 20160629
Time 20.10
INSTRUM spect
PROBHD 5 mm PATEO 19F
PULPROG zgpg30
ID 65536
SOLVENT CDC13
NS 512
DS 4
SWH 30030.029 Hz
FIDRES 0.458222 Hz
AQ 1.0912410 sec
RG 143.7
SW 16.650 usec
DE 6.00 usec
TE 296.7 K
D1 2.00000000 sec
d11 0.03000000 sec
DELTA 1.89999998 sec
TD 1
----- CHANNEL f1 -----
NUC1 13C
P1 9.50 usec
PL1 -0.50 dB
SFO1 125.7703643 MHz
----- CHANNEL f2 -----
CPDPRG2 waltz16
NUC1 1H
PCPD2 80.00 usec
PL2 1.00 dB
PL13 15.99 dB
PL13 16.50 dB
SFO2 500.1330885 MHz
SI 32768
SF 125.7577890 MHz
WDW sc
SSB 0
LB 0.00 Hz
GB 0
FC 0.20

```

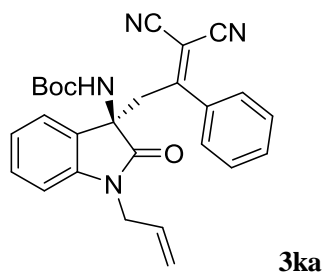

<chromatogram>

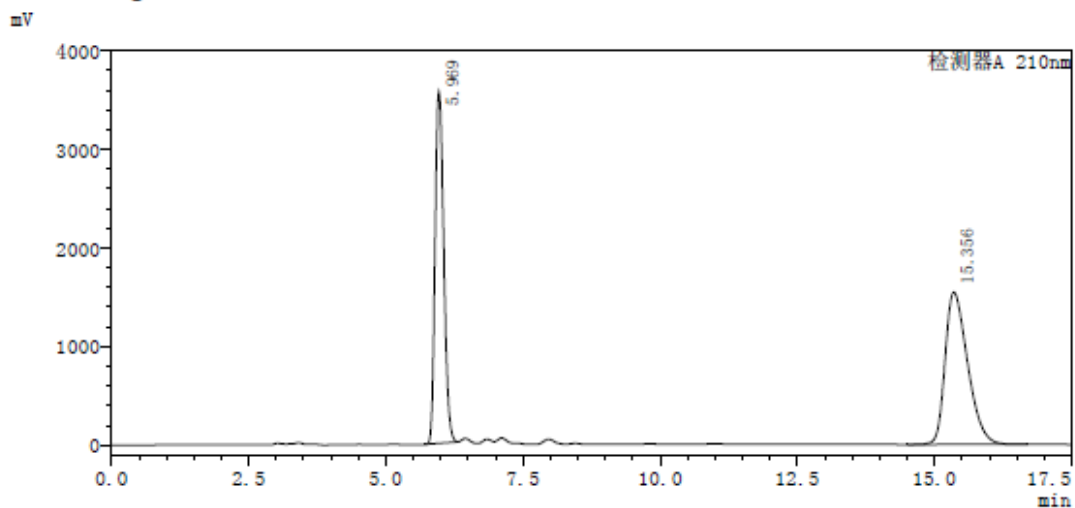

<Peak table>

检测器A 210nm

| Peak# | Ret. Time | Height  | Area     | Area%   |
|-------|-----------|---------|----------|---------|
| 1     | 5.969     | 3571745 | 39227104 | 47.062  |
| 2     | 15.356    | 1545594 | 44125206 | 52.938  |
| 总计    |           | 5117339 | 83352309 | 100.000 |

<chromatogram>

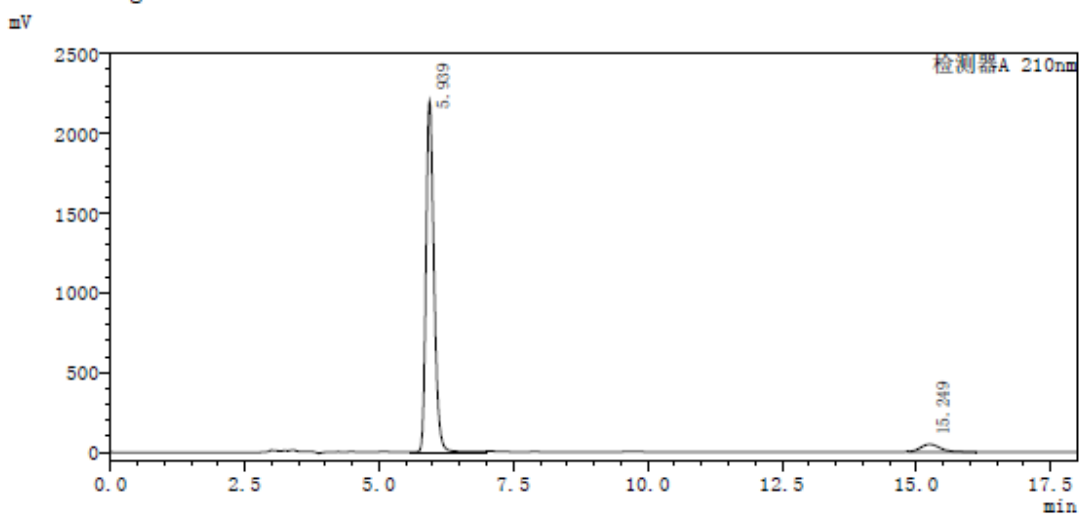

<Peak table>

检测器A 210nm

| Peak# | Ret. Time | Height  | Area     | Area%   |
|-------|-----------|---------|----------|---------|
| 1     | 5.939     | 2201011 | 22573559 | 95.068  |
| 2     | 15.249    | 47644   | 1171036  | 4.932   |
| 总计    |           | 2248654 | 23744595 | 100.000 |

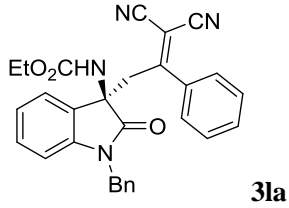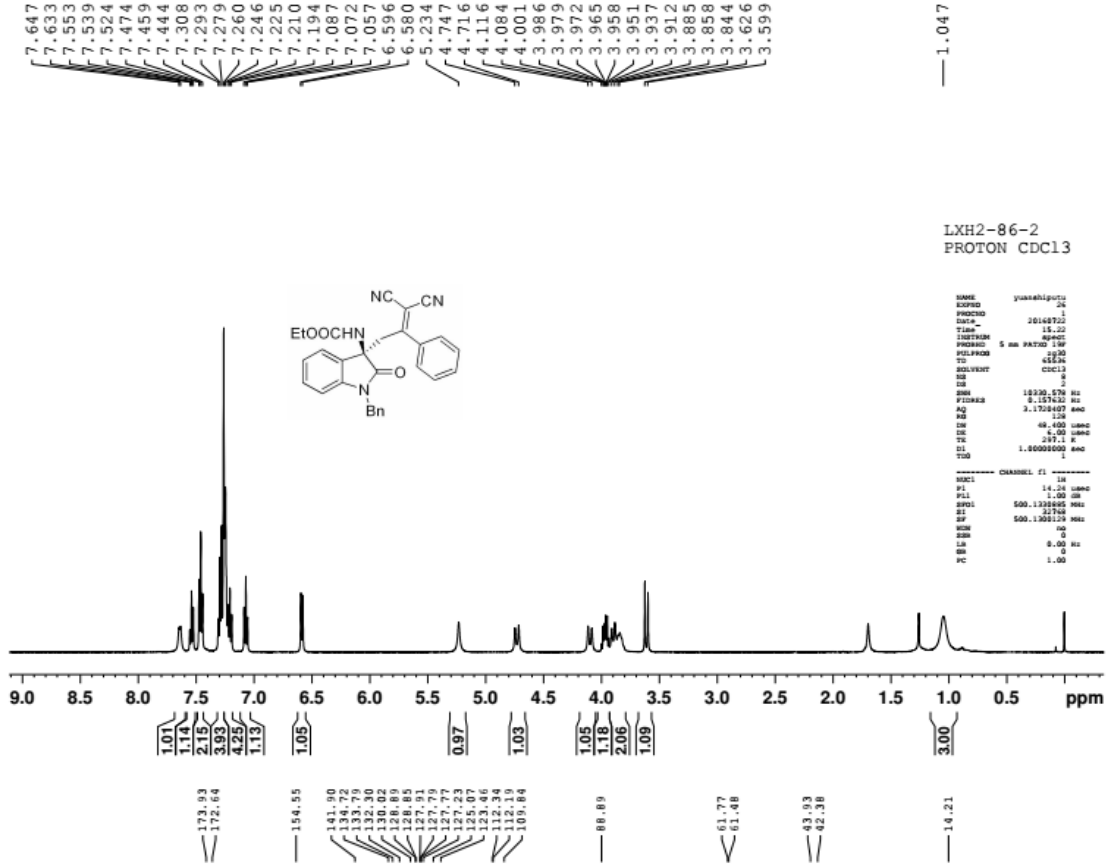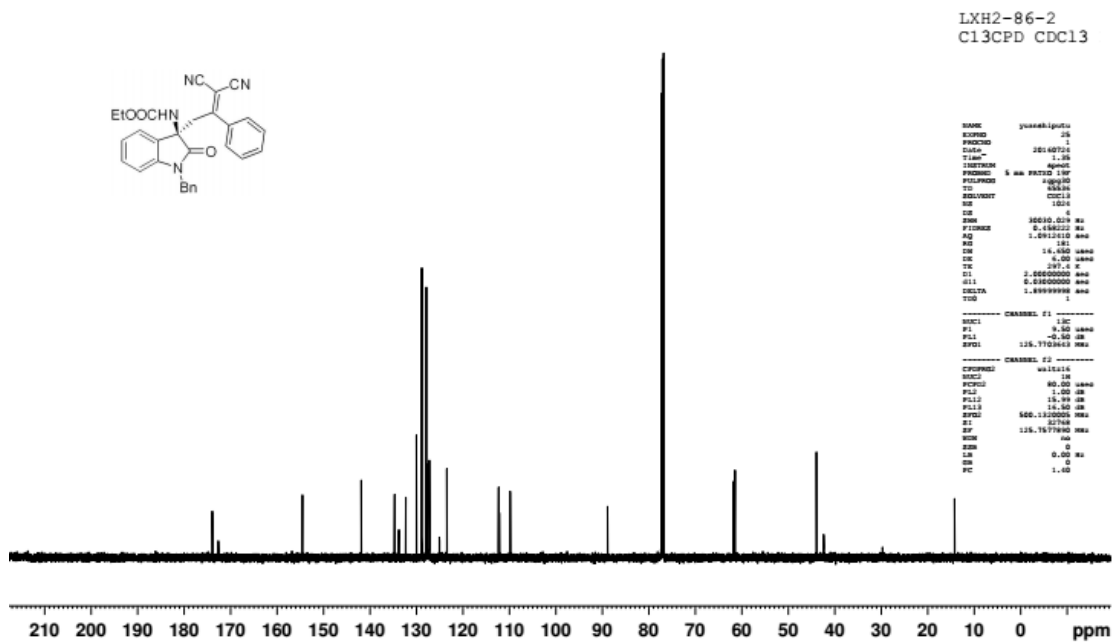



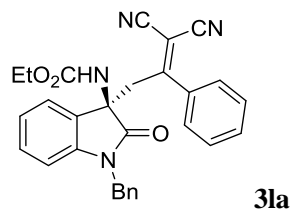

<chromatogram>

mV

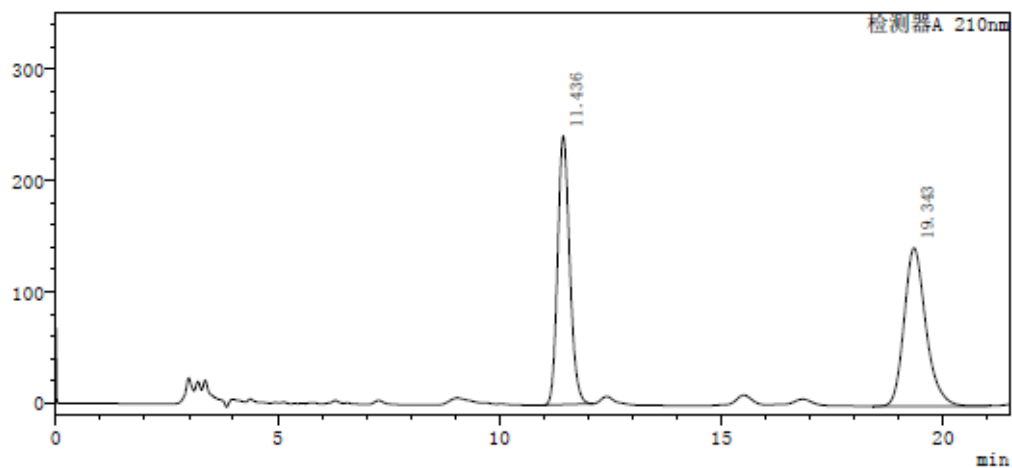

<Peak table>

检测器A 210nm

| Peak# | Ret. Time | Height | Area    | Area%   |
|-------|-----------|--------|---------|---------|
| 1     | 11.436    | 241202 | 4547435 | 48.413  |
| 2     | 19.343    | 141970 | 4845566 | 51.587  |
| 总计    |           | 383172 | 9393001 | 100.000 |

<chromatogram>

mV

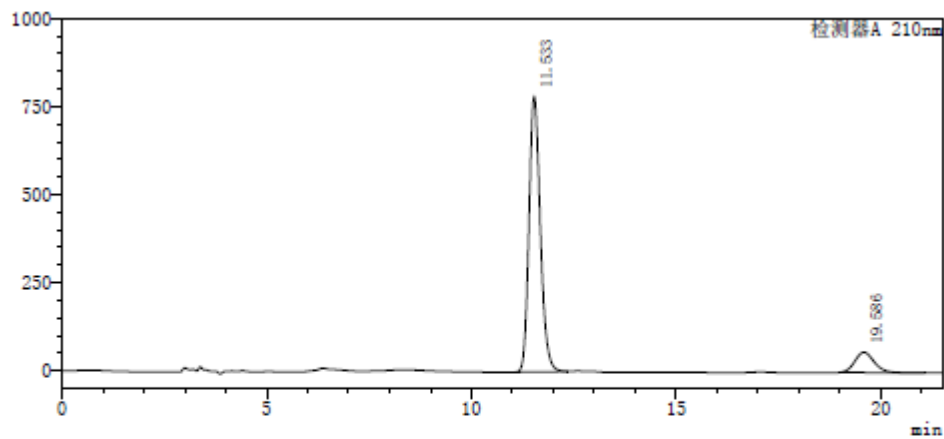

<Peak table>

检测器A 210nm

| Peak# | Ret. Time | Height | Area     | Area%   |
|-------|-----------|--------|----------|---------|
| 1     | 11.533    | 781473 | 15038700 | 88.726  |
| 2     | 19.586    | 57931  | 1910946  | 11.274  |
| 总计    |           | 839404 | 16949647 | 100.000 |

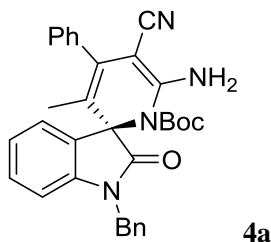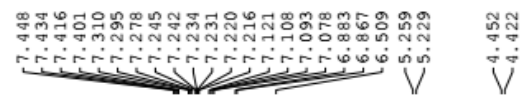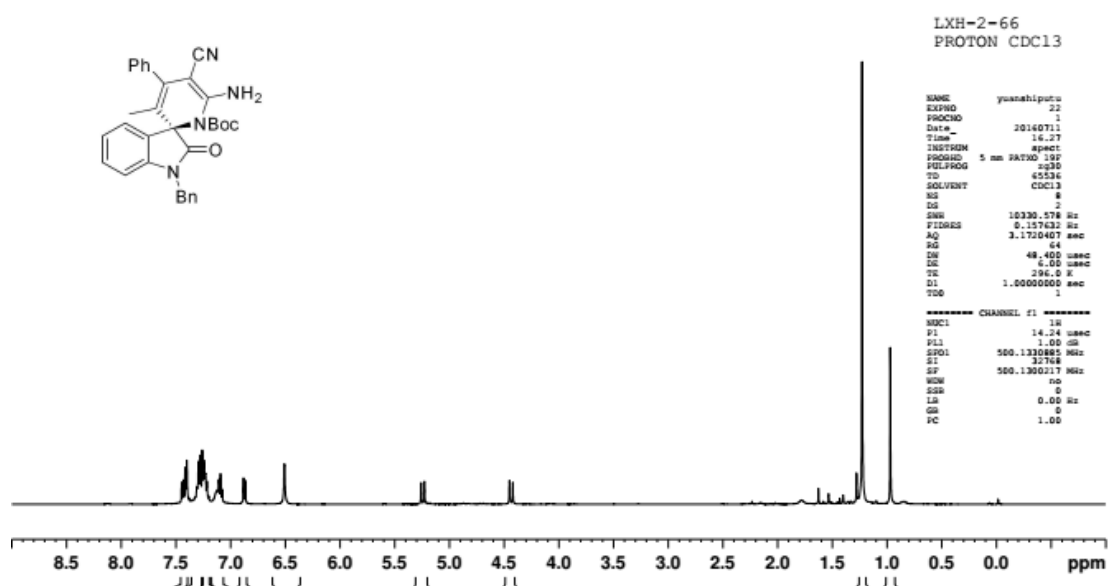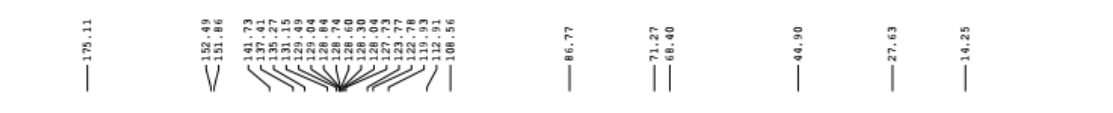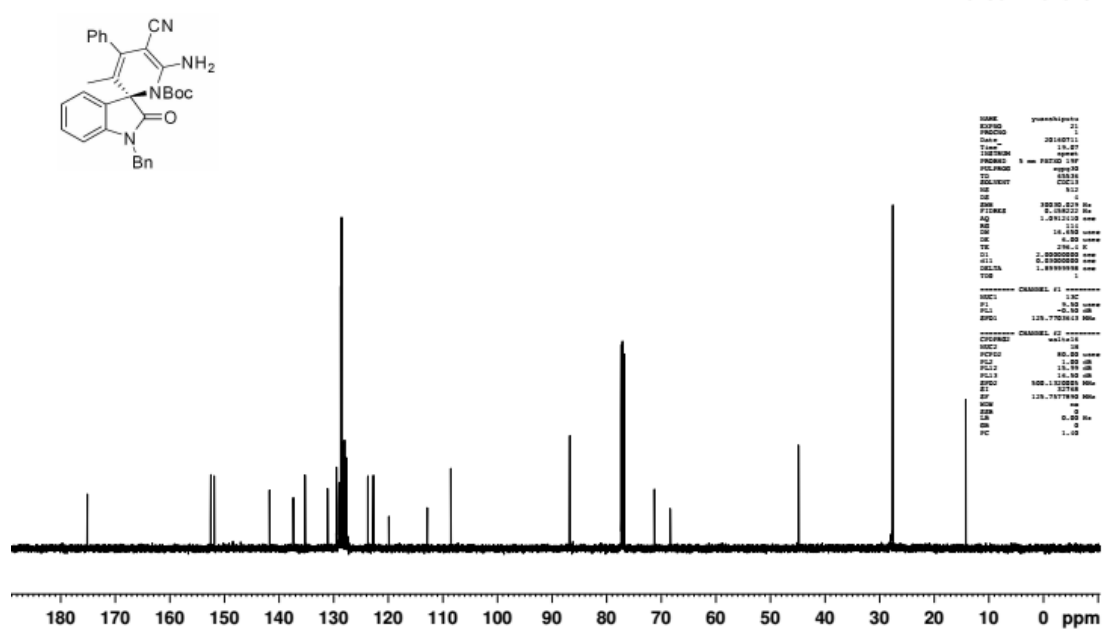

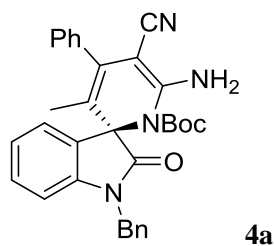

<chromatogram>

mV

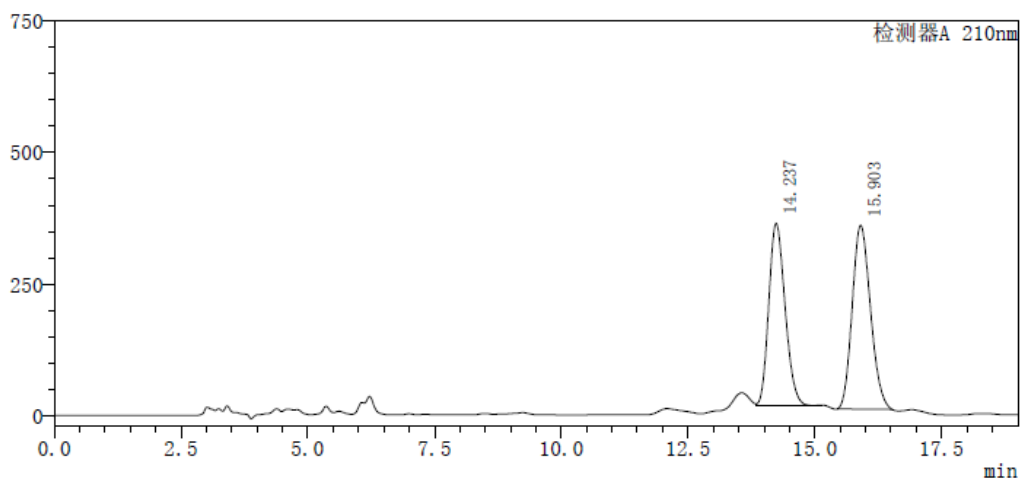

<Peak table>

检测器A 210nm

| Peak# | Ret. Time | Height | Area     | Area%   |
|-------|-----------|--------|----------|---------|
| 1     | 14.237    | 345159 | 7650298  | 46.611  |
| 2     | 15.903    | 349482 | 8762843  | 53.389  |
| 总计    |           | 694641 | 16413140 | 100.000 |

<chromatogram>

mV

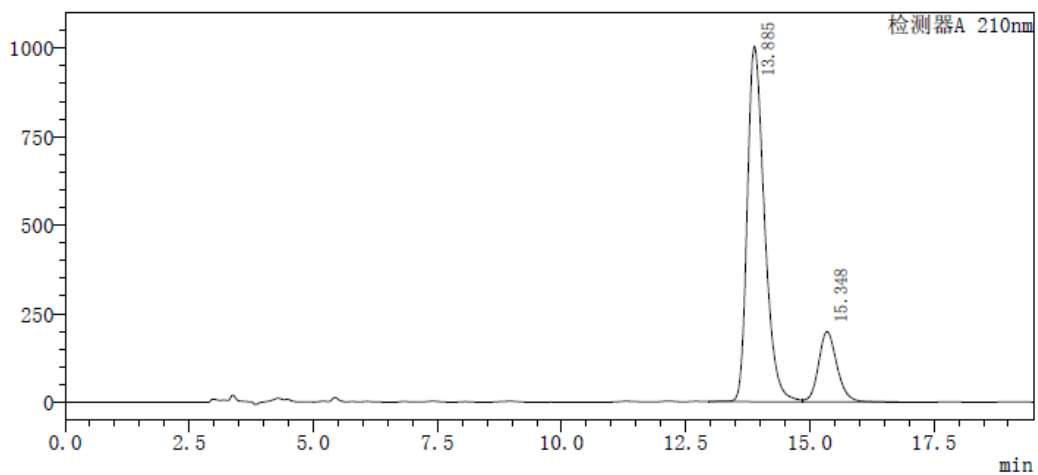

<Peak table>

检测器A 210nm

| Peak# | Ret. Time | Height  | Area     | Area%   |
|-------|-----------|---------|----------|---------|
| 1     | 13.885    | 1003830 | 24172058 | 82.488  |
| 2     | 15.348    | 198548  | 5131702  | 17.512  |
| 总计    |           | 1202378 | 29303760 | 100.000 |

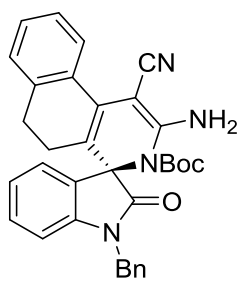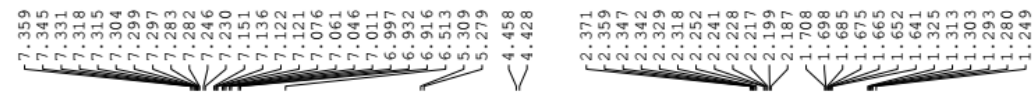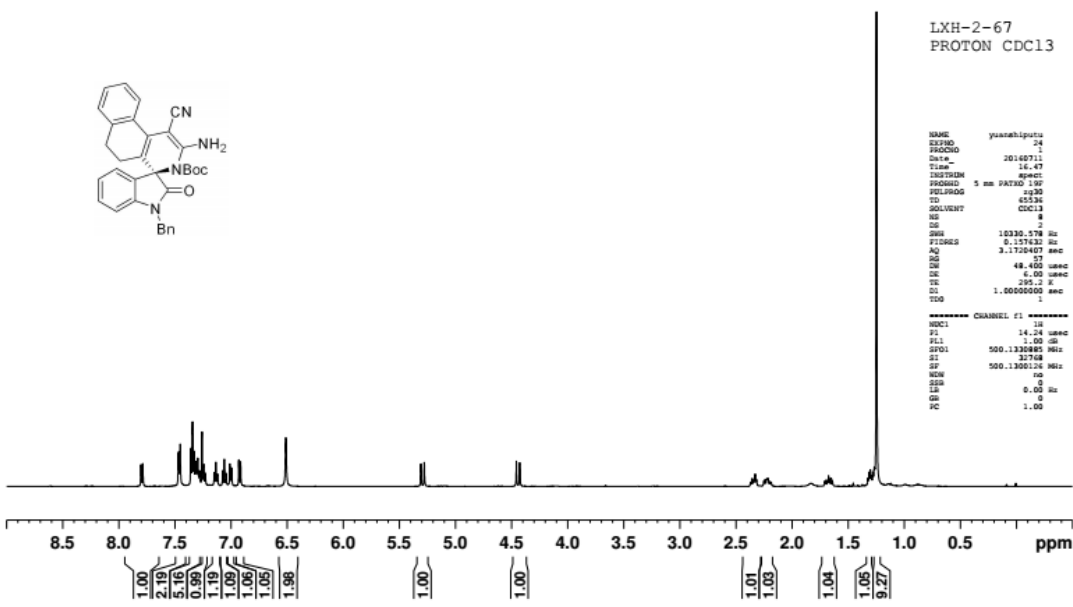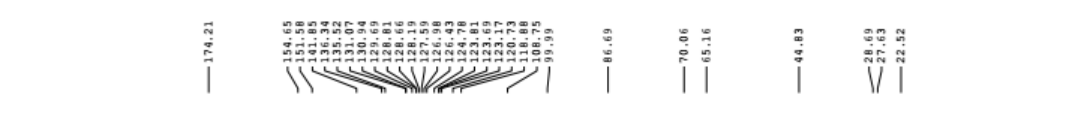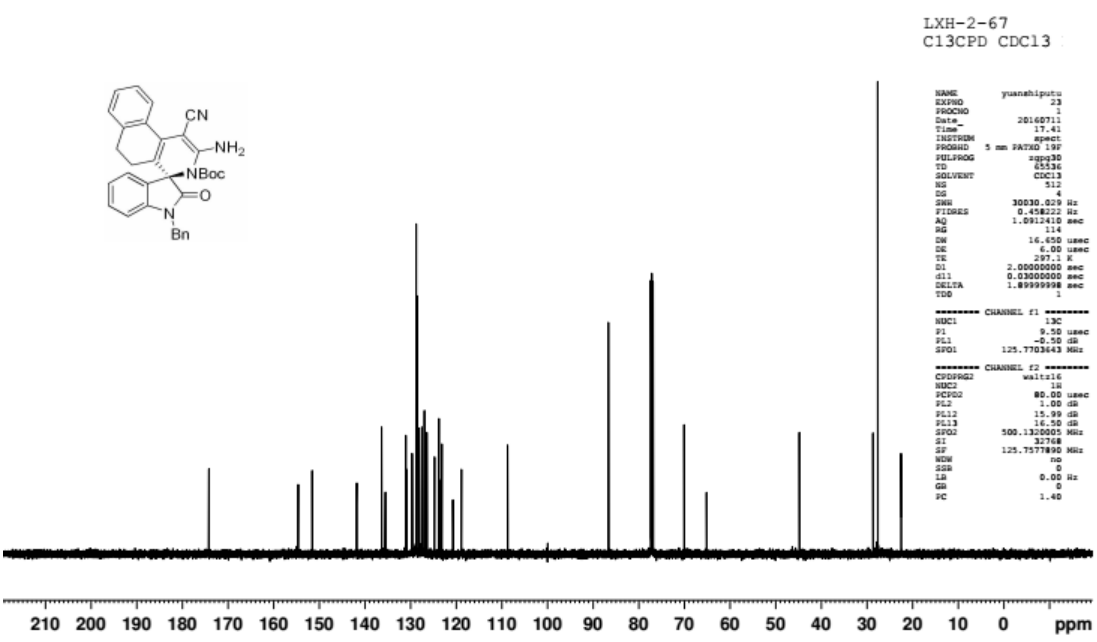

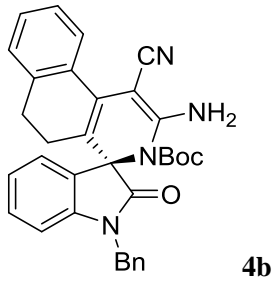

<chromatogram>

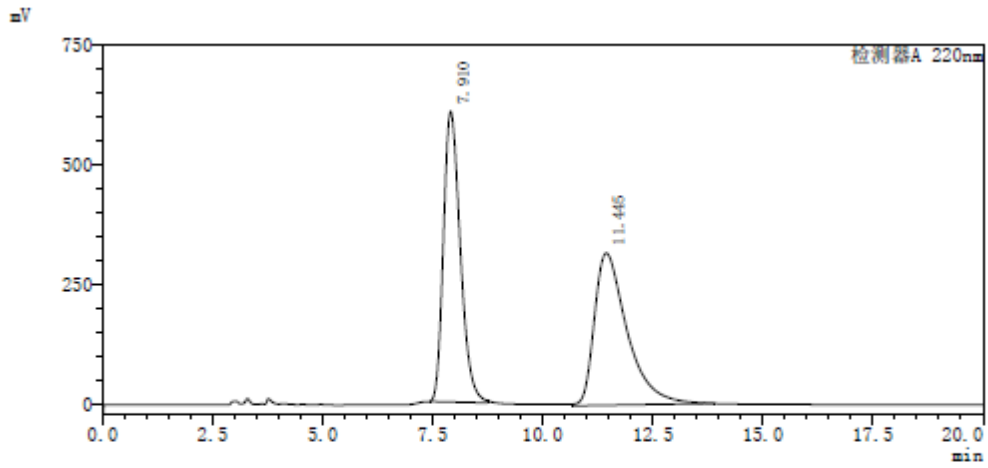

<Peak table>

检测器A 220nm

| Peak# | Ret. Time | Height | Area     | Area%   |
|-------|-----------|--------|----------|---------|
| 1     | 7.910     | 604543 | 16030038 | 49.407  |
| 2     | 11.445    | 316614 | 16414894 | 50.593  |
| 总计    |           | 921157 | 32444932 | 100.000 |

<chromatogram>

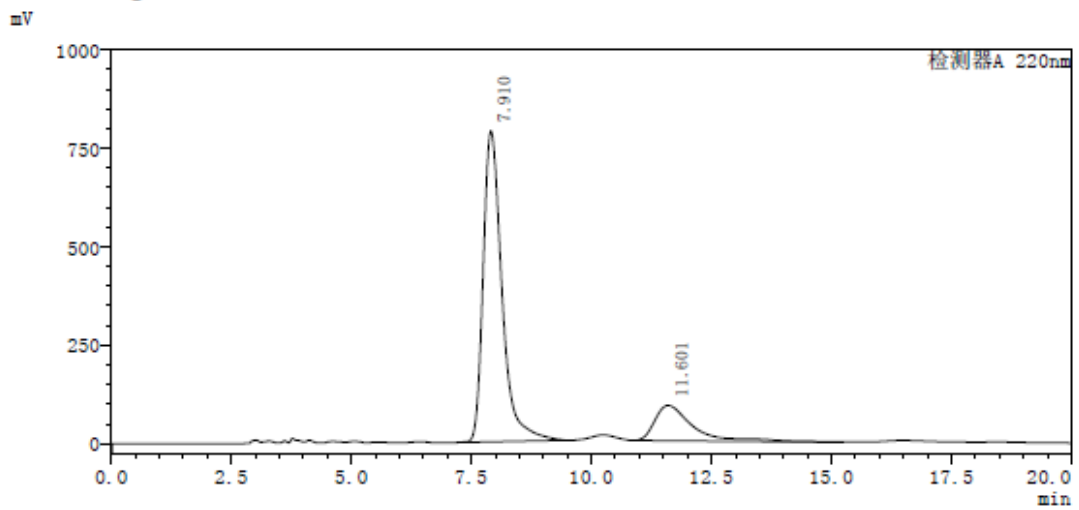

<Peak table>

检测器A 220nm

| Peak# | Ret. Time | Height | Area     | Area%   |
|-------|-----------|--------|----------|---------|
| 1     | 7.910     | 789577 | 21398118 | 80.988  |
| 2     | 11.601    | 90109  | 5023126  | 19.012  |
| 总计    |           | 879686 | 26421244 | 100.000 |

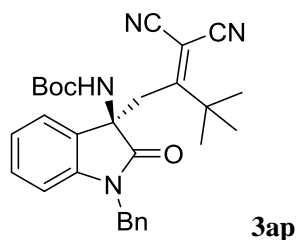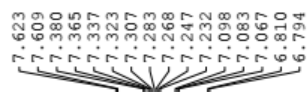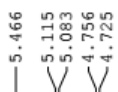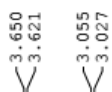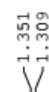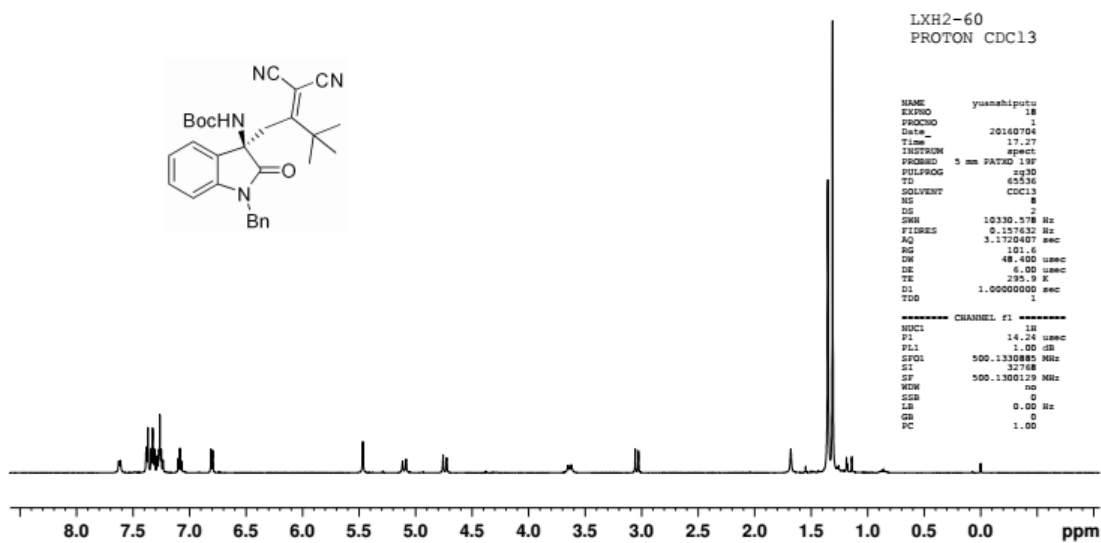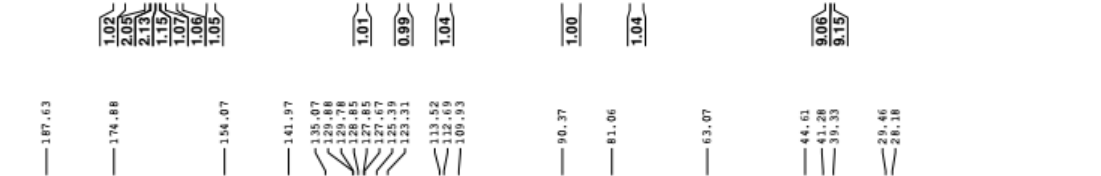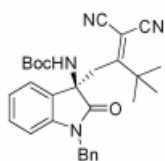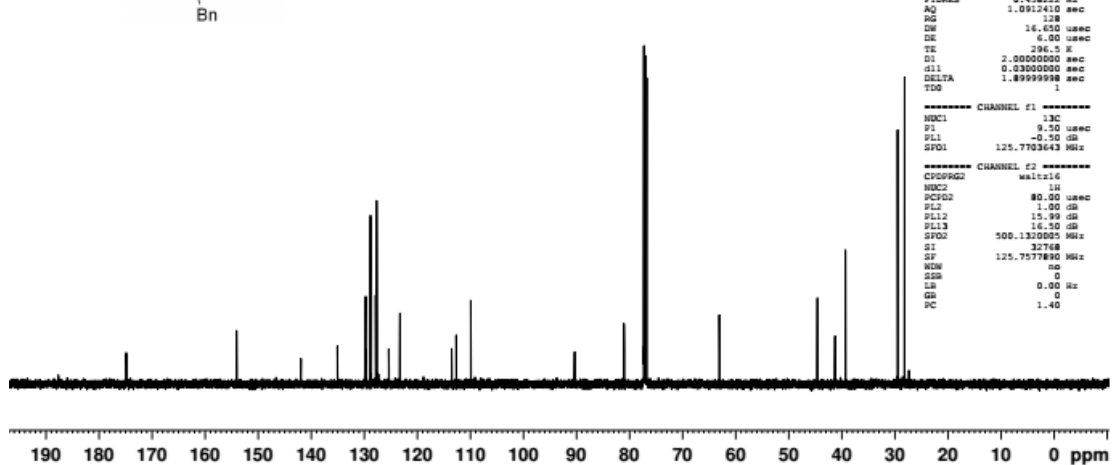

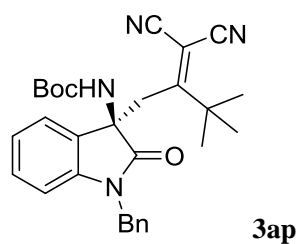

<chromatogram>

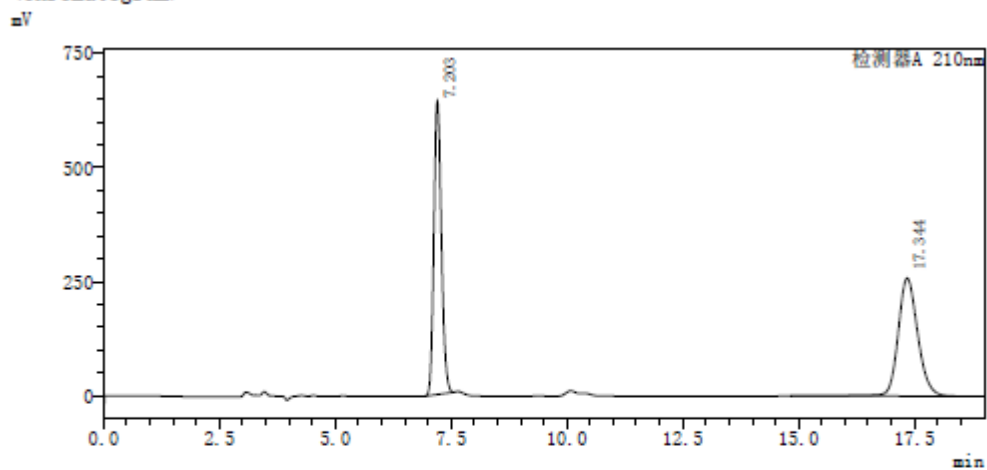

<Peak table>

检测器A 210nm

| Peak# | Ret. Time | Height | Area     | Area%   |
|-------|-----------|--------|----------|---------|
| 1     | 7.203     | 642914 | 7265364  | 48.813  |
| 2     | 17.344    | 258329 | 7618725  | 51.187  |
| 总计    |           | 901243 | 14884090 | 100.000 |

<chromatogram>

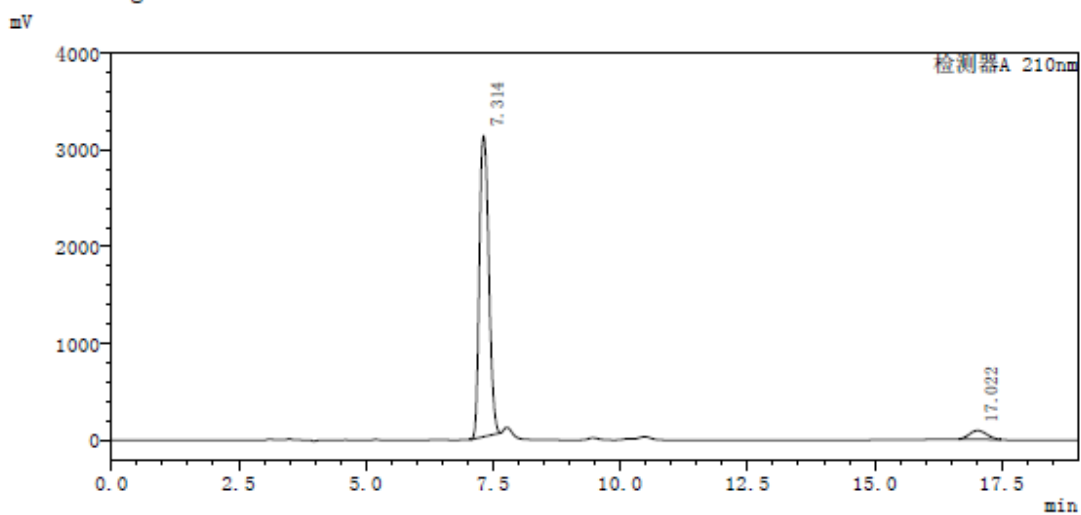

<Peak table>

检测器A 210nm

| Peak# | Ret. Time | Height  | Area     | Area%   |
|-------|-----------|---------|----------|---------|
| 1     | 7.314     | 3108117 | 39992437 | 94.928  |
| 2     | 17.022    | 91634   | 2136774  | 5.072   |
| 总计    |           | 3199751 | 42129211 | 100.000 |

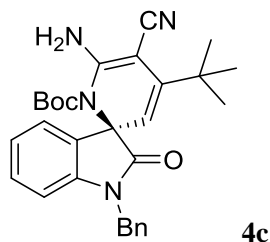

7.329  
7.324  
7.319  
7.288  
7.275  
7.260  
7.222  
7.207  
7.192  
7.052  
7.038  
7.022  
6.744  
6.728

5.404  
5.373

4.373  
4.314  
4.284

1.179  
1.133

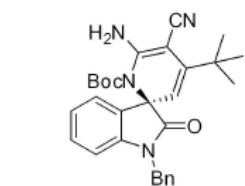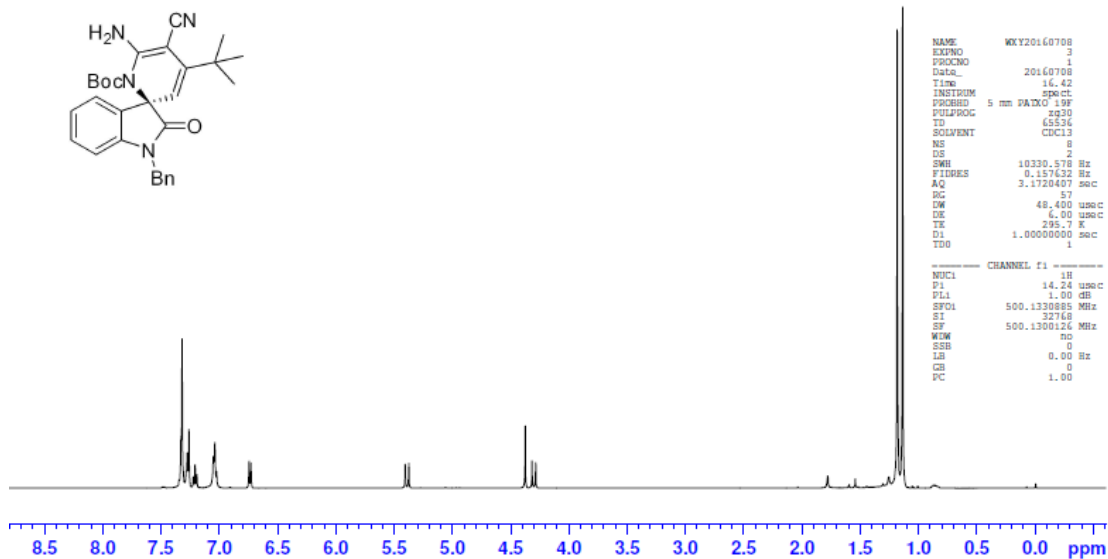

LXH2-60-2  
PROTON CDC13

```

NAME      MXY20160708
EXPNO     3
PROCNO    1
Date_     20160708
Time      16.42
INSTRUM   spect
PROBHD    5 mm PAXCO 19F
PULPROG   zgpg30
TD         65536
SOLVENT   CDCl3
NS         2
DS         2
SWH        10330.578 Hz
FIDRES     0.157432 Hz
AQ         3.1720407 sec
RG         57
RW         48.400 us/c
DE         6.00 us/c
TE         295.2 K
D1         1.00000000 sec
TD0        1
----- CHANNEL f1 -----
NUC1       1H
P1         14.24 us/c
PL1        1.00 dB
SFO1       500.1330885 MHz
SI         32768
SF         500.1300126 MHz
WDW        hc
SSB        0
LB         0.00 Hz
GB         0
PC         1.00
  
```

4.06  
2.95  
1.07  
3.02  
1.00  
1.02  
1.03  
1.01  
9.04  
9.10

175.48  
152.00  
139.99  
138.24  
135.40  
128.95  
128.82  
127.92  
127.36  
123.53  
122.14  
121.89  
109.16  
103.38  
86.51  
68.45  
63.59  
43.85  
34.41  
31.85  
28.56  
27.37

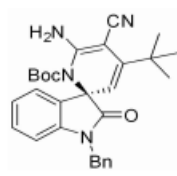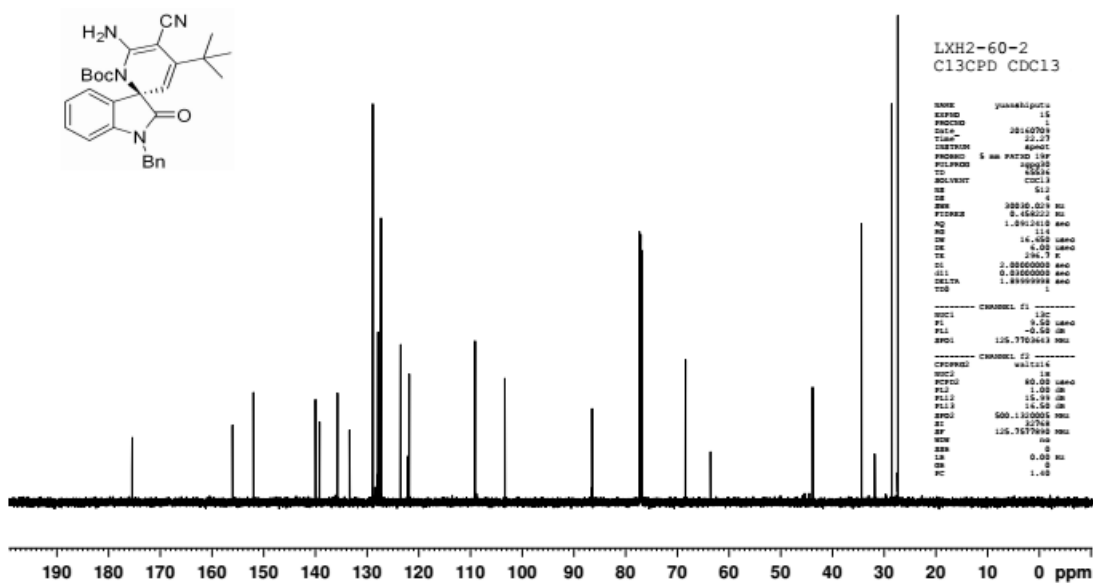

LXH2-60-2  
C13CPD CDC13

```

NAME      yuankuipuz
EXPNO     15
PROCNO    1
Date_     20160708
Time      12.37
INSTRUM   spect
PROBHD    5 mm PAXCO 19F
PULPROG   zgpg30
TD         65536
SOLVENT   CDCl3
NS         2
DS         2
SWH        20216.000 Hz
FIDRES     0.456222 Hz
AQ         1.2912610 sec
RG         114
RW         14.000 us/c
DE         4.00 us/c
TE         296.2 K
D1         2.00000000 sec
D11        0.21000000 sec
DELTA     1.89999998 sec
TD0        1
----- CHANNEL f1 -----
NUC1       13C
P1         9.50 us/c
PL1        0.50 dB
SFO1       125.7703643 MHz
----- CHANNEL f2 -----
CPDPRG2   waltz16
NUC2       1H
PCPD2     80.00 us/c
PL2       1.00 dB
PL12      15.19 dB
PL13      14.00 dB
SFO2      500.1330885 MHz
SF        125.7677036 MHz
WDW        hc
SSB        0
LB         0.00 Hz
GB         0
PC         1.00
  
```



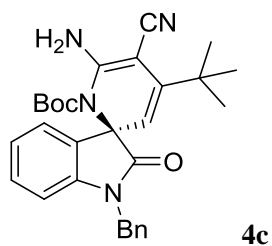

<chromatogram>

mV

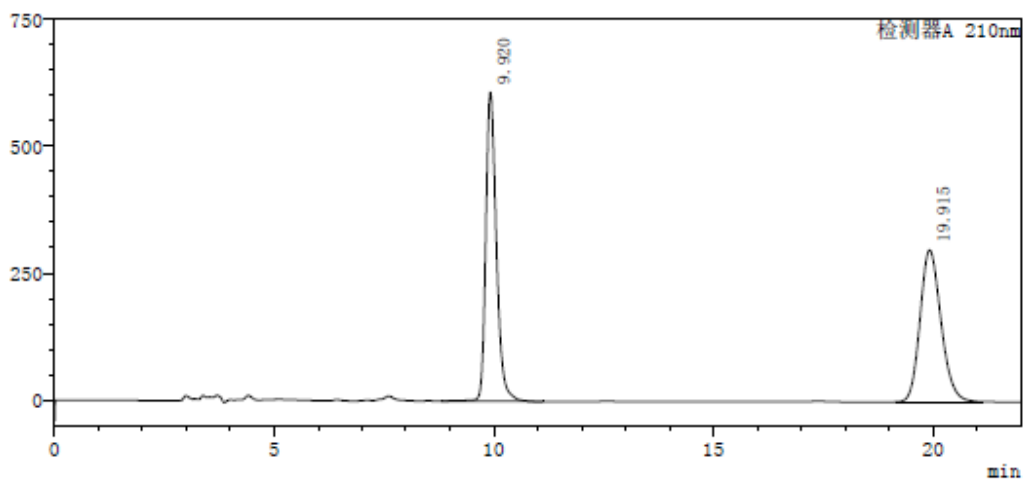

<Peak table>

检测器A 210nm

| Peak# | Ret. Time | Height | Area     | Area%   |
|-------|-----------|--------|----------|---------|
| 1     | 9.920     | 607871 | 10188014 | 50.530  |
| 2     | 19.915    | 299612 | 9974176  | 49.470  |
| 总计    |           | 907483 | 20162190 | 100.000 |

<chromatogram>

mV

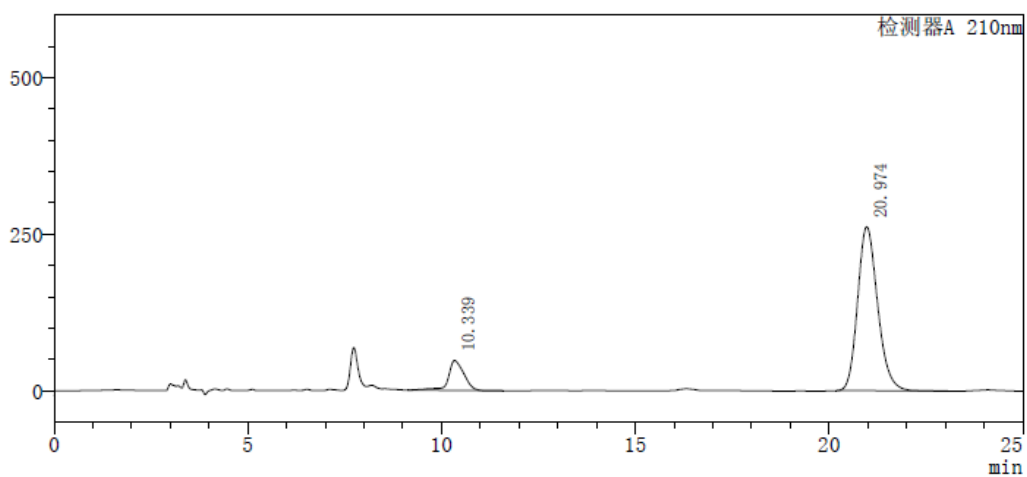

<Peak table>

检测器A 210nm

| Peak# | Ret. Time | Height | Area     | Area%   |
|-------|-----------|--------|----------|---------|
| 1     | 10.339    | 47716  | 1327207  | 12.420  |
| 2     | 20.974    | 261537 | 9358728  | 87.580  |
| 总计    |           | 309253 | 10685936 | 100.000 |

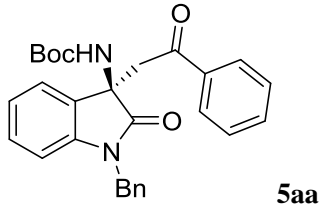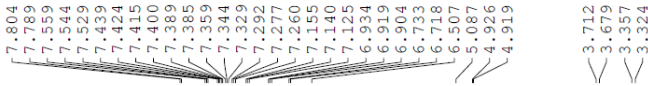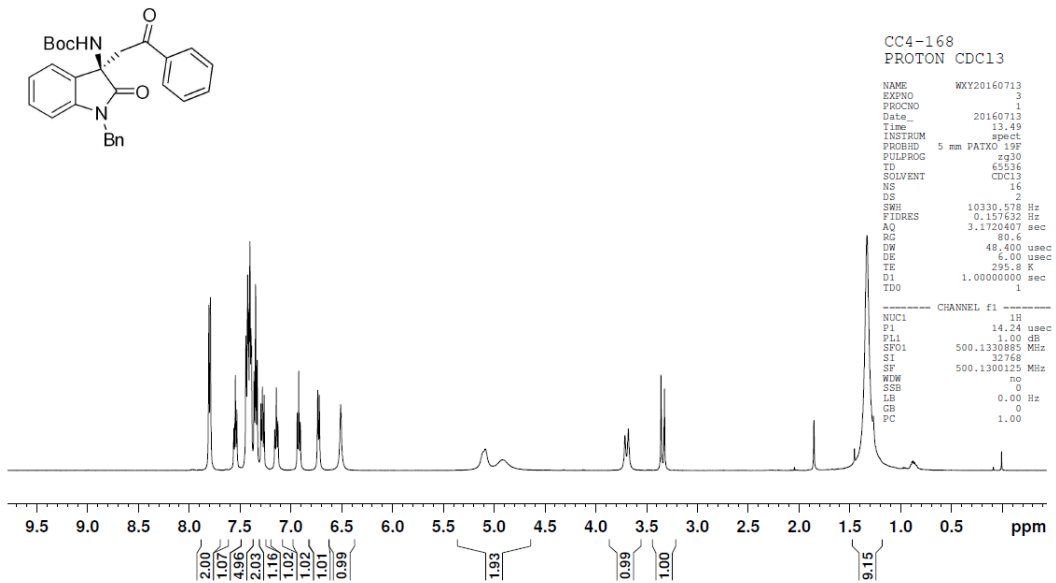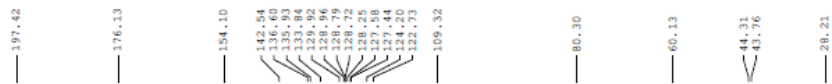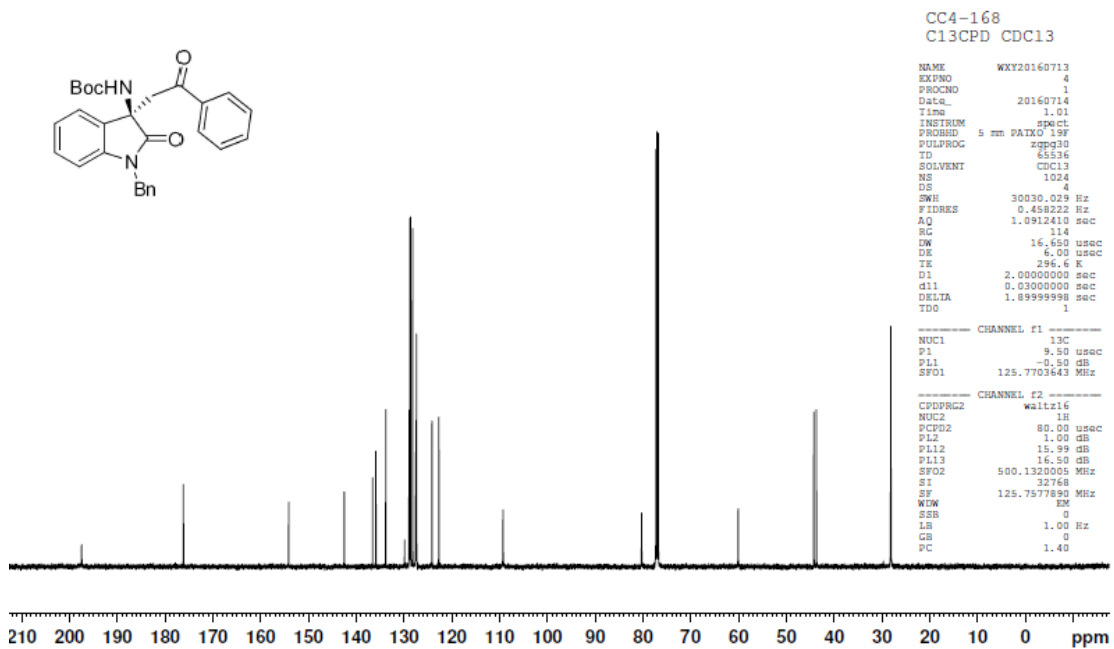

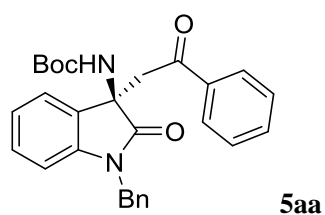

<chromatogram>  
mV

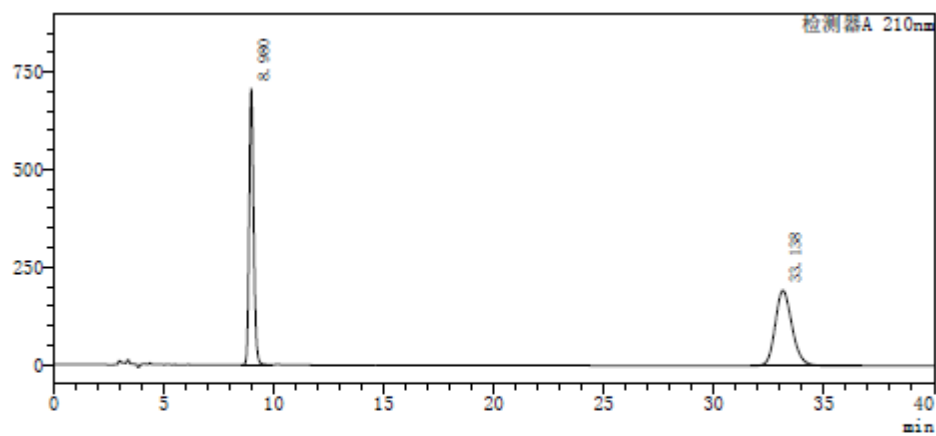

<Peak table>

| 检测器A 210nm |           |        |          |         |
|------------|-----------|--------|----------|---------|
| Peak#      | Ret. Time | Height | Area     | Area%   |
| 1          | 8.980     | 709472 | 10089285 | 49.659  |
| 2          | 33.138    | 192675 | 10227752 | 50.341  |
| 总计         |           | 902148 | 20317037 | 100.000 |

<chromatogram>

mV

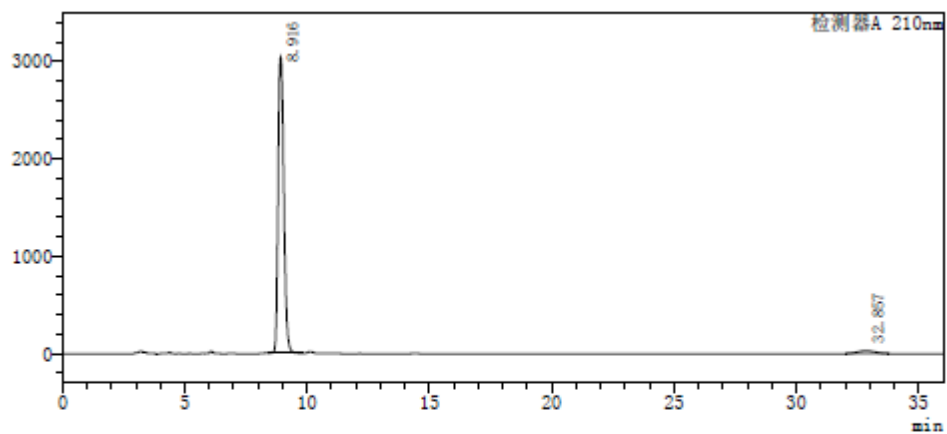

<Peak table>

| 检测器A 210nm |           |         |          |         |
|------------|-----------|---------|----------|---------|
| Peak#      | Ret. Time | Height  | Area     | Area%   |
| 1          | 8.916     | 3043456 | 49716508 | 97.318  |
| 2          | 32.857    | 28272   | 1369974  | 2.682   |
| 总计         |           | 3071729 | 51086482 | 100.000 |

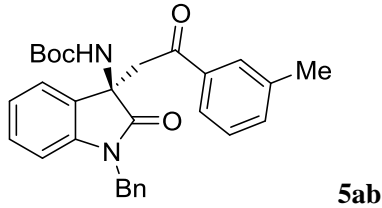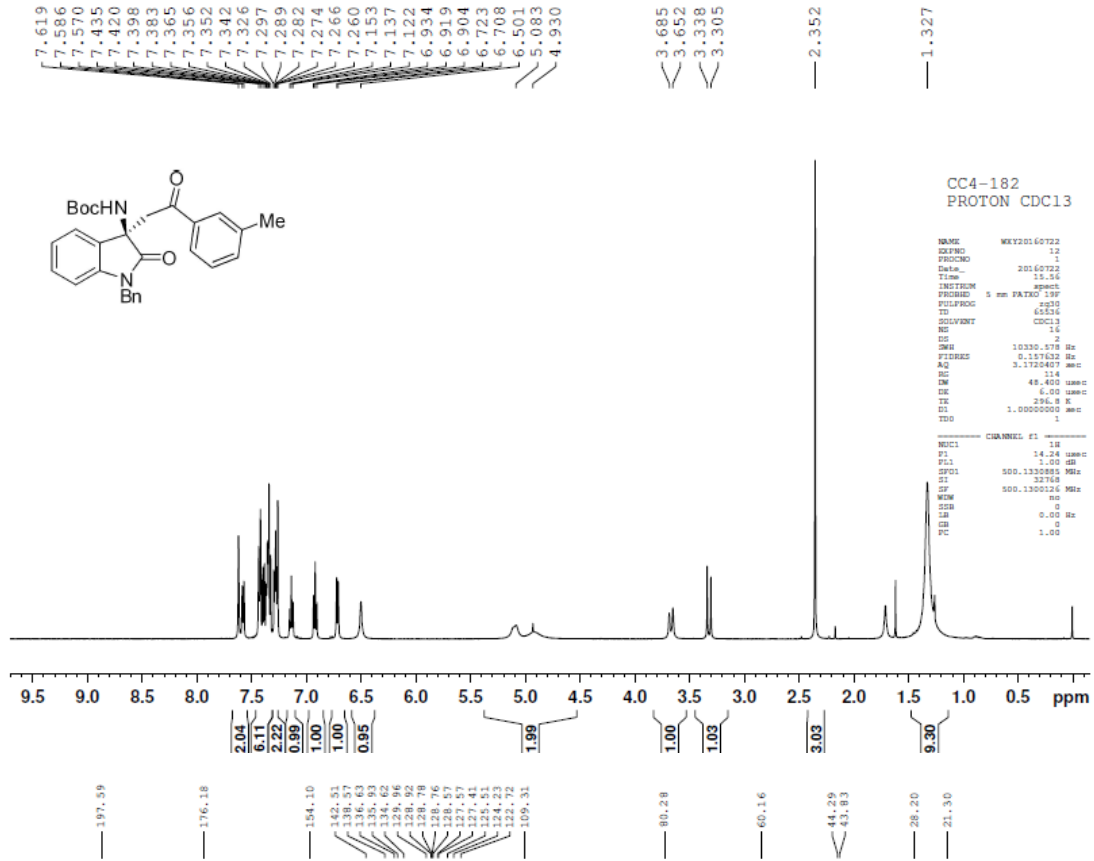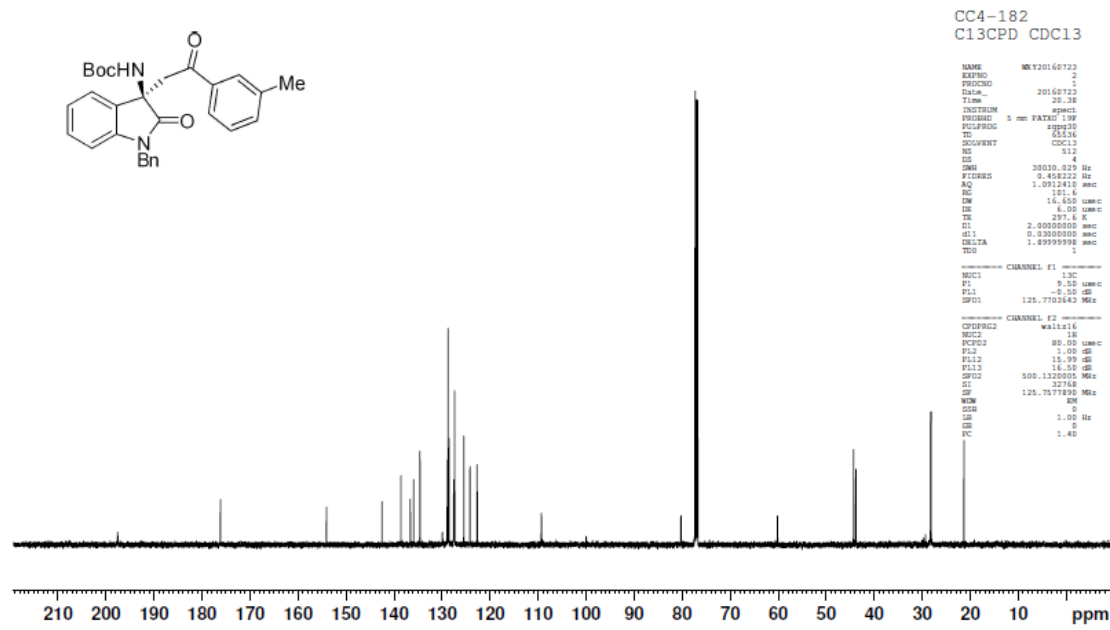

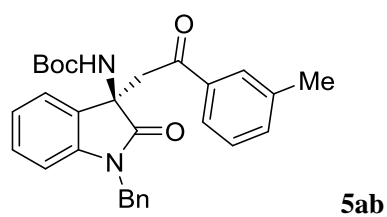

<chromatogram>

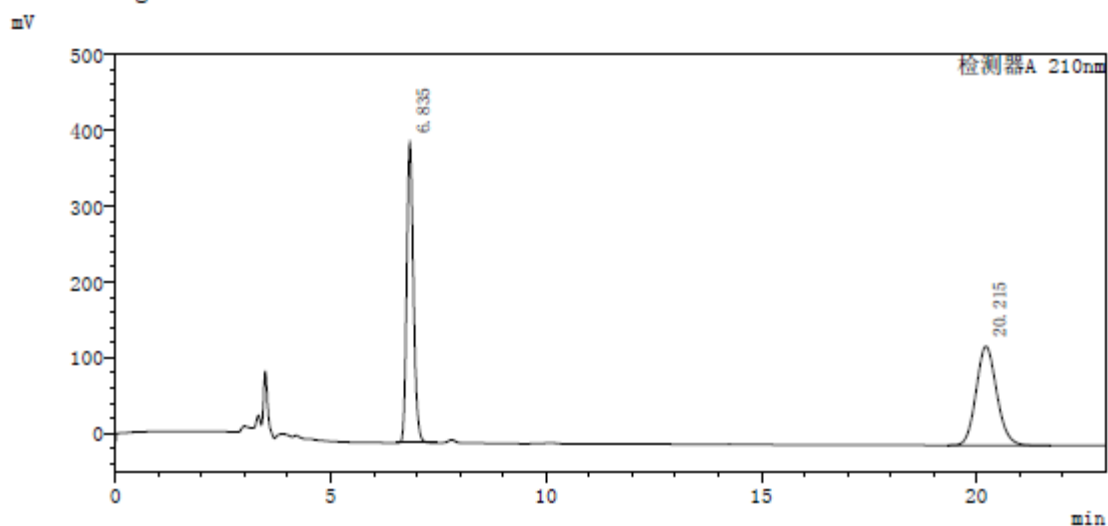

<Peak table>

检测器A 210nm

| Peak# | Ret. Time | Height | Area    | Area%   |
|-------|-----------|--------|---------|---------|
| 1     | 6.835     | 395978 | 4329385 | 49.799  |
| 2     | 20.215    | 130568 | 4364270 | 50.201  |
| 总计    |           | 526546 | 8693655 | 100.000 |

<chromatogram>

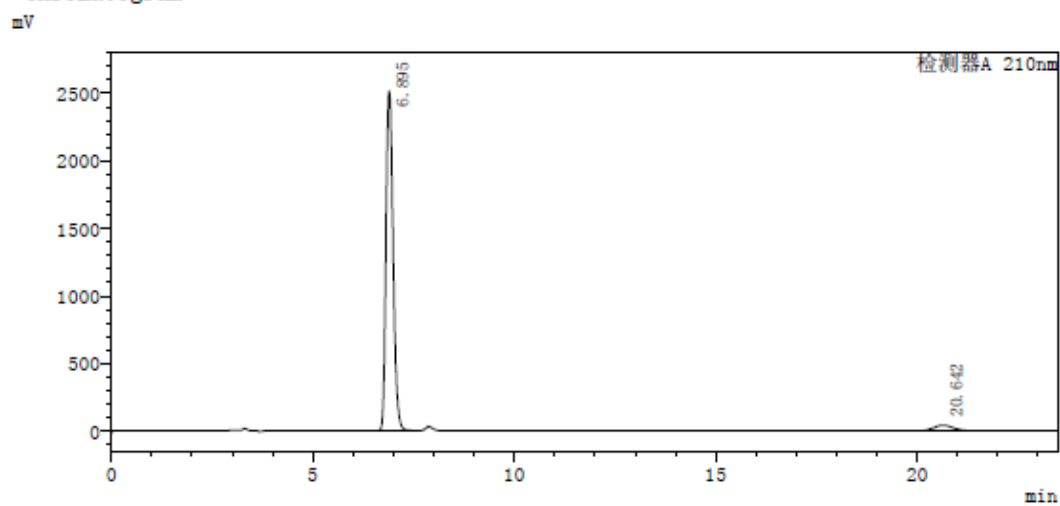

<Peak table>

检测器A 210nm

| Peak# | Ret. Time | Height  | Area     | Area%   |
|-------|-----------|---------|----------|---------|
| 1     | 6.895     | 2513626 | 31037295 | 96.085  |
| 2     | 20.642    | 40121   | 1264546  | 3.915   |
| 总计    |           | 2553746 | 32301841 | 100.000 |

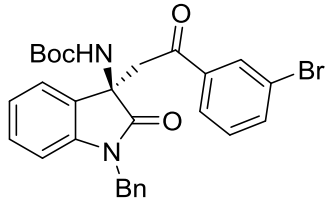

**5ad**

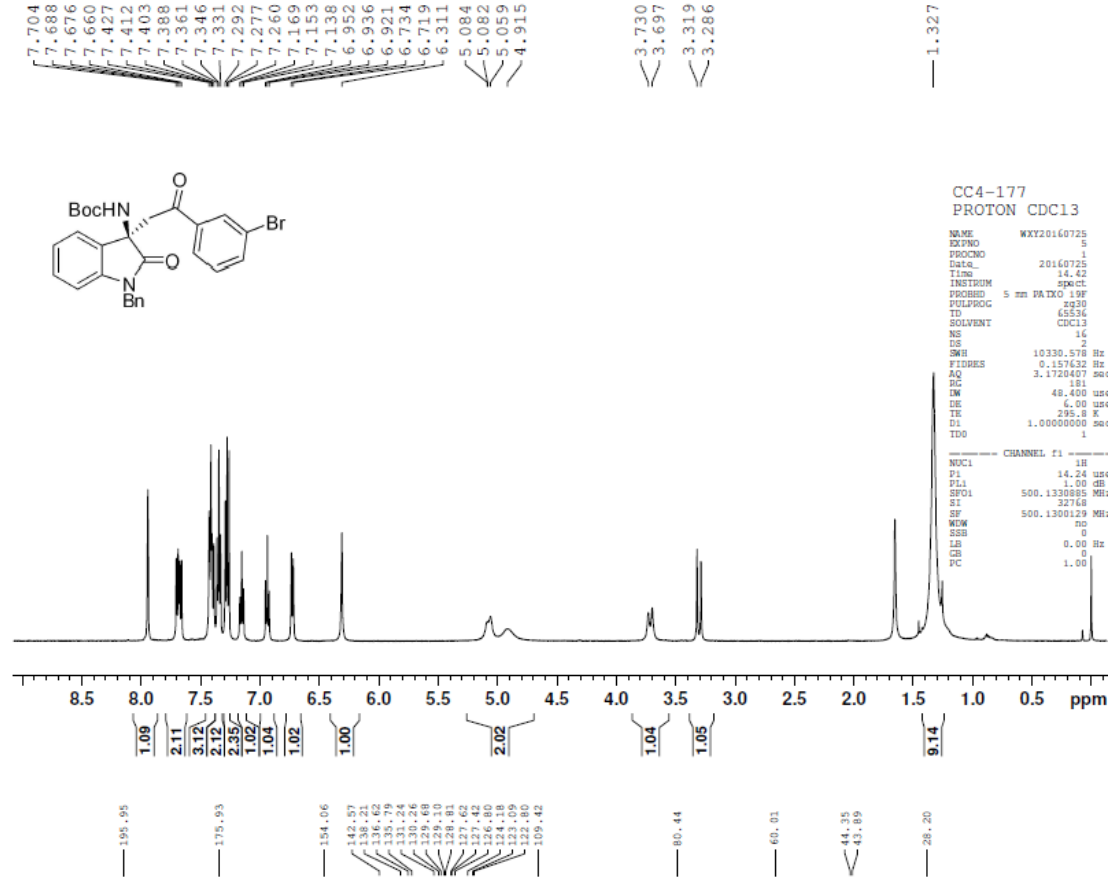

CC4-177  
PROTON CDCl3

```

NAME      WKY20160725
EXPNO    5
PROCNO   1
Date_    20160725
Time     14.42
INSTRUM  spect
PROBHD   5 mm PAIXO 19F
PULPROG  zg30
TD        65536
SOLVENT  CDCl3
NS        16
DS        2
SWH       10330.578 Hz
FIDRES   0.157632 Hz
AQ        3.1720407 sec
RG        181
DW        48.400 usec
DE        6.00 usec
TE        295.2 K
D1        1.00000000 sec
TDO       1
  
```

```

CHANNEL f1
NUC1      1H
P1        14.24 usec
PL1       1.00 dB
SFO1     500.1320000 MHz
SI        32768
SF        500.1300129 MHz
WVM       0
SSB       0
LB        0.00 Hz
GB        0
PC        1.00
  
```

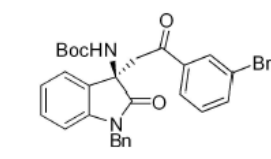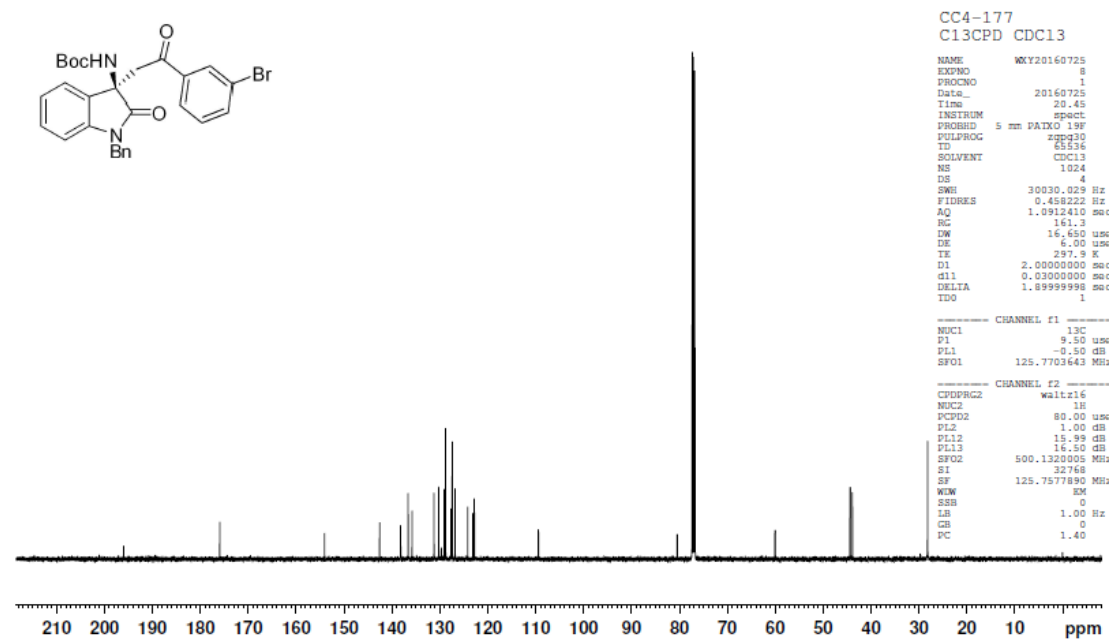

CC4-177  
C13CPD CDCl3

```

NAME      WKY20160725
EXPNO    8
PROCNO   1
Date_    20160725
Time     20.45
INSTRUM  spect
PROBHD   5 mm PAIXO 19F
PULPROG  zgpg30
TD        65536
SOLVENT  CDCl3
NS        1024
DS        4
SWH       30030.029 Hz
FIDRES   0.458222 Hz
AQ        1.0912410 sec
RG        161.3
DW        16.450 usec
DE        6.00 usec
TE        297.2 K
D1        2.00000000 sec
d11      0.03000000 sec
DELTA    1.89999998 sec
TDO       1
  
```

```

CHANNEL f1
NUC1      13C
P1        9.50 usec
PL1       -0.50 dB
SFO1     125.7703643 MHz

CHANNEL f2
CPDPRG2  waltz16
NUC2      1H
PCPD2    80.00 usec
PL2       1.00 dB
PL12     15.99 dB
PL13     16.50 dB
SFO2     500.1320000 MHz
SI        32768
SF        125.7577890 MHz
WVM       0
SSB       0
LB        1.00 Hz
GB        0
PC        1.40
  
```

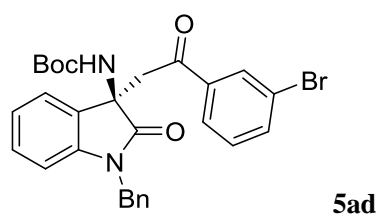

<chromatogram>

mV

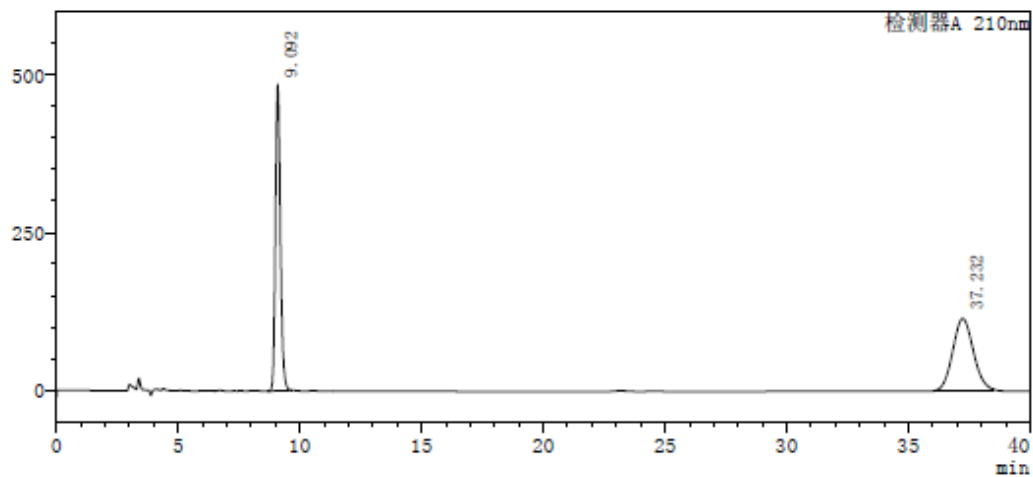

<Peak table>

检测器A 210nm

| Peak# | Ret. Time | Height | Area     | Area%   |
|-------|-----------|--------|----------|---------|
| 1     | 9.092     | 484287 | 6931690  | 50.642  |
| 2     | 37.232    | 114517 | 6755814  | 49.358  |
| 总计    |           | 598804 | 13687503 | 100.000 |

<chromatogram>

mV

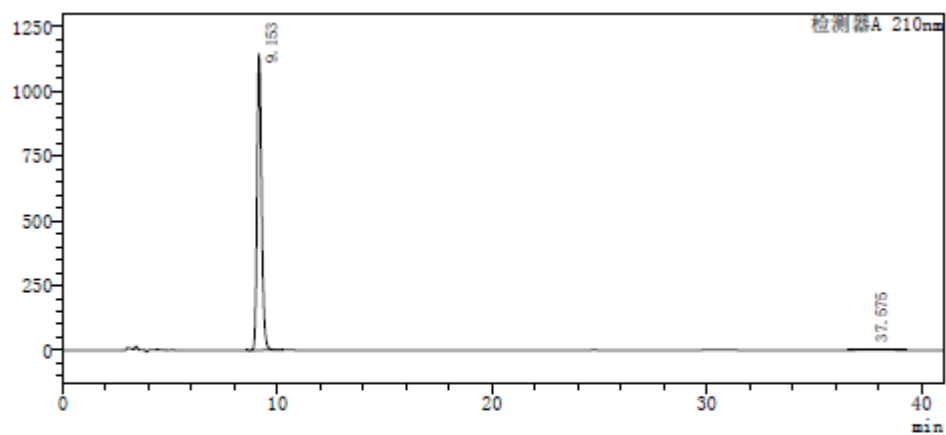

<Peak table>

检测器A 210nm

| Peak# | Ret. Time | Height  | Area     | Area%   |
|-------|-----------|---------|----------|---------|
| 1     | 9.153     | 1143350 | 16794526 | 99.294  |
| 2     | 37.575    | 1579    | 119445   | 0.706   |
| 总计    |           | 1144929 | 16913971 | 100.000 |

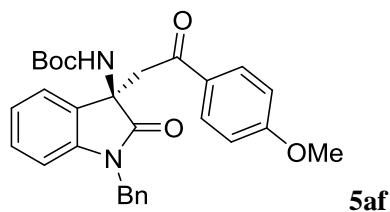

7.773  
 7.755  
 7.434  
 7.419  
 7.358  
 7.341  
 7.326  
 7.288  
 7.273  
 7.260  
 7.146  
 7.131  
 7.115  
 6.920  
 6.905  
 6.890  
 6.862  
 6.845  
 6.725  
 6.709  
 6.630  
 5.089  
 4.921  
 3.829  
 3.583  
 3.551  
 3.286  
 3.253  
 1.322

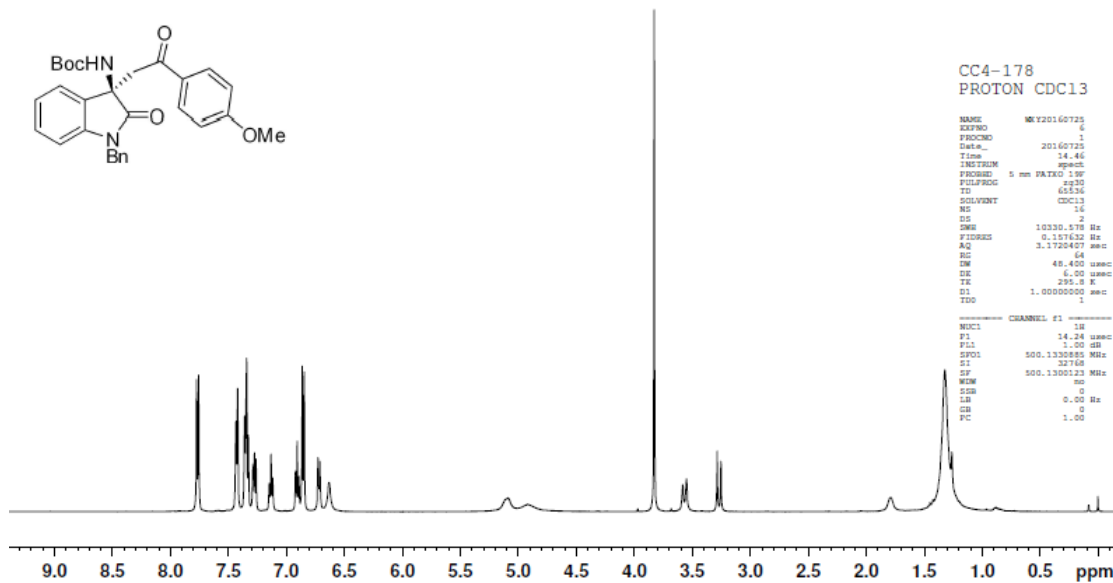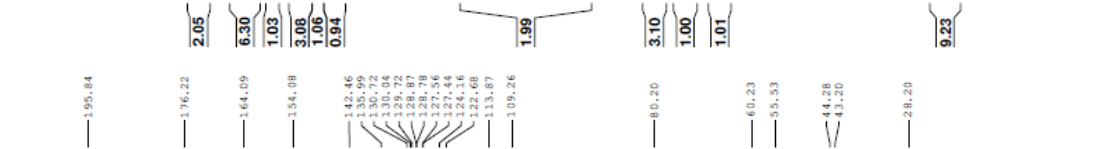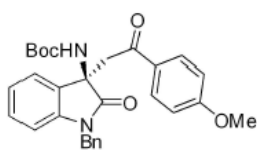

**CC4-178**  
**C13CPD CDC13**

|         |                |
|---------|----------------|
| NAME    | WX20160725     |
| EXPNO   | 9              |
| PROCNO  | 1              |
| Date_   | 20160725       |
| Time    | 21.44          |
| INSTRUM | spc01          |
| PROBHD  | 5 mm PATXO 19F |
| PULPROG | zgpg30         |
| TD      | 53336          |
| SOLVENT | CDC13          |
| NS      | 1024           |
| DS      | 4              |
| SWH     | 30030.029 Hz   |
| FIDRES  | 0.458222 Hz    |
| AQ      | 1.0912419 sec  |
| RG      | 101.6          |
| DW      | 16.650 usec    |
| DE      | 6.00 usec      |
| TE      | 298.0 K        |
| D1      | 2.00000000 sec |
| d11     | 0.03000000 sec |
| DELTA   | 1.89999999 sec |
| TD0     | 1              |

CHANNEL f1 ---  
 NUC1 13C  
 P1 9.50 usec  
 PL1 -0.50 dB  
 SFO1 125.7703643 MHz

CHANNEL f2 ---  
 CPDPRG2 waltz16  
 NUC2 1H  
 PCPD2 80.00 usec  
 PL2 1.00 dB  
 PL12 15.99 dB  
 PL13 16.50 dB  
 SFO2 500.1320003 MHz  
 SI 32768  
 SF 125.7577890 MHz  
 NS 1024  
 DS 4  
 SSB 0  
 LB 1.00 Hz  
 GB 0  
 PC 1.40

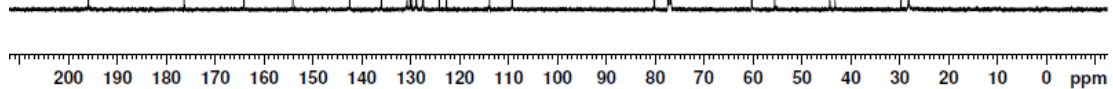



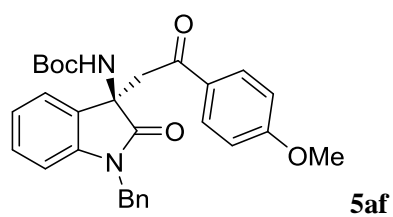

<chromatogram>

mV

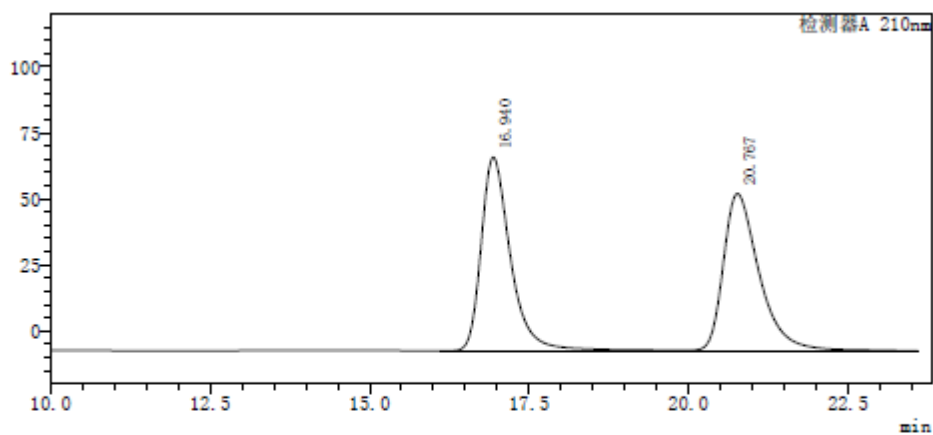

<Peak table>

检测器A 210nm

| Peak# | Ret. Time | Height | Area    | Area%   |
|-------|-----------|--------|---------|---------|
| 1     | 16.940    | 73239  | 2374231 | 50.363  |
| 2     | 20.767    | 59455  | 2339972 | 49.637  |
| 总计    |           | 132694 | 4714203 | 100.000 |

<chromatogram>

mV

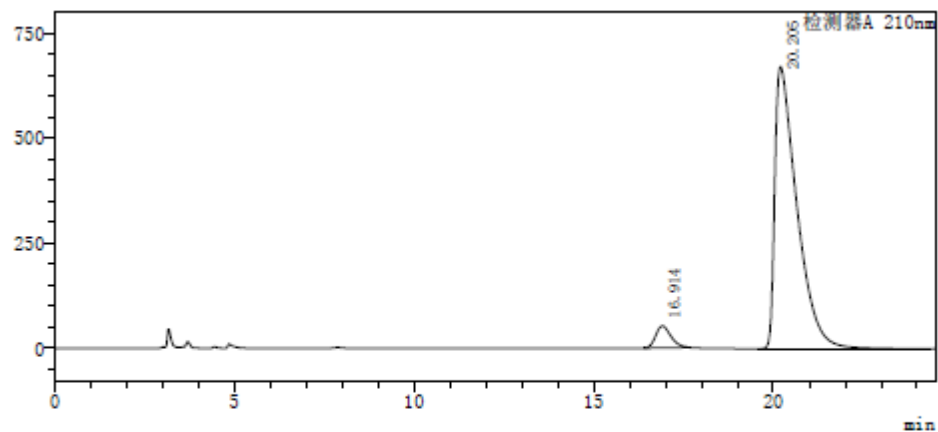

<Peak table>

检测器A 210nm

| Peak# | Ret. Time | Height | Area     | Area%   |
|-------|-----------|--------|----------|---------|
| 1     | 16.914    | 52151  | 1533594  | 3.069   |
| 2     | 20.205    | 670529 | 28723470 | 94.931  |
| 总计    |           | 722680 | 30257064 | 100.000 |

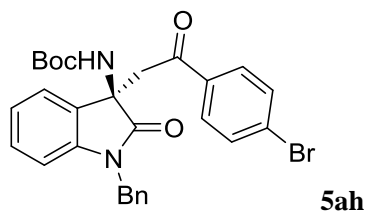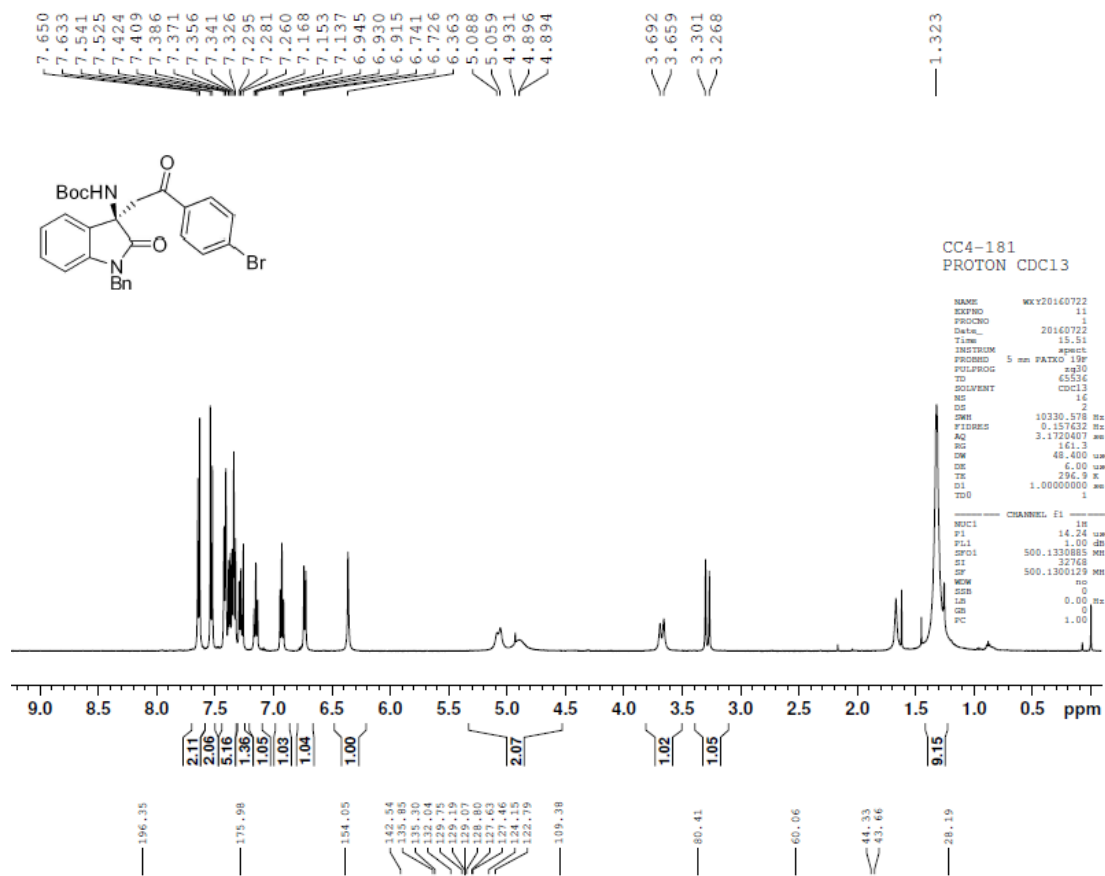

CC4-181  
 PROTON CDC13

```

NAME WXY20160722
EXPNO 1
PROCNO 1
Date_ 20160722
Time 15.51
INSTRUM spect
PROBHD 5 mm PAKO 13P
PULPROG zgpg30
TD 65536
SOLVENT CDC13
NS 16
DS 2
SWH 10230.578 Hz
FIDRES 0.157632 Hz
AQ 3.1720407 sec
RG 161.3
CW 48.400 usec
DE 6.00 usec
TE 296.9 K
D1 1.00000000 sec
TD0 1
----- CHANNEL f1 -----
NUC1 1H
P1 14.24 usec
PL1 0.00 dB
SFO1 500.1330885 MHz
SI 32768
SF 500.1300129 MHz
WDW no
SSB 0
LB 0.00 Hz
GB 0
PC 1.00
  
```

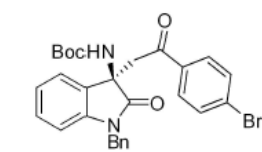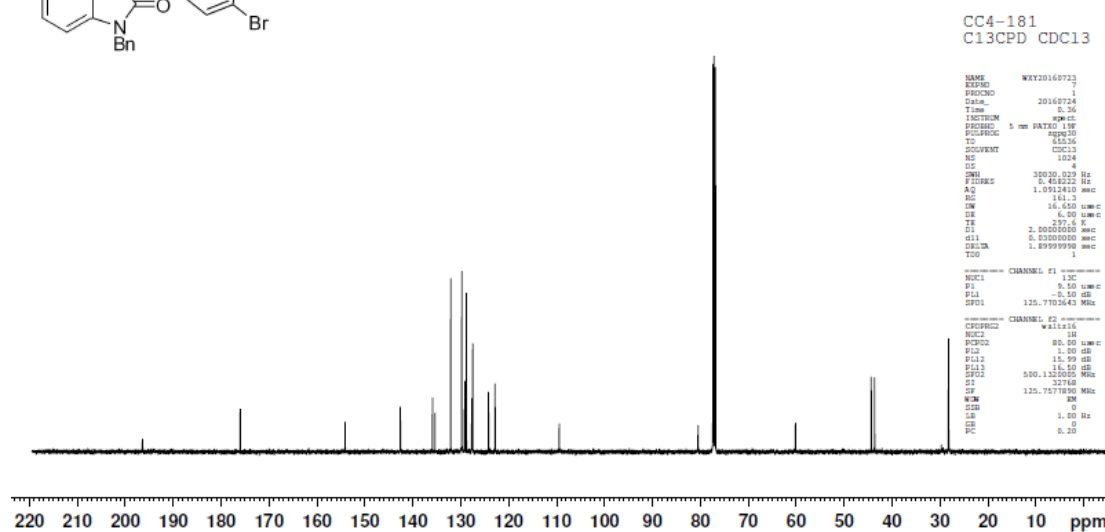

CC4-181  
 C13CPD CDC13

```

NAME WXY20160722
EXPNO 1
PROCNO 1
Date_ 20160724
Time 0.36
INSTRUM spect
PROBHD 5 mm PAKO 13P
PULPROG zgpg30
TD 65536
SOLVENT CDC13
NS 1024
DS 30030.029 Hz
SWH 8.402222 Hz
AQ 1.9018418 sec
RG 161.3
CW 14.400 usec
DE 6.00 usec
TE 297.2 K
D1 2.50000000 sec
d11 0.53000000 sec
DETA 1.89999999 sec
TD0 1
----- CHANNEL f1 -----
NUC1 13C
P1 9.10 usec
PL1 0.00 dB
SFO1 125.767890 MHz
----- CHANNEL f2 -----
CPDPRG2 waltz16
NUC2 1H
PCPD2 80.00 usec
PL2 1.00 dB
PL12 10.00 dB
PL13 10.00 dB
SFO2 500.1320000 MHz
SI 32768
SF 125.767890 MHz
WDW no
SSB 0
LB 1.00 Hz
GB 0
PC 0.20
  
```

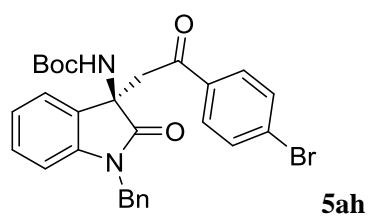

<chromatogram>

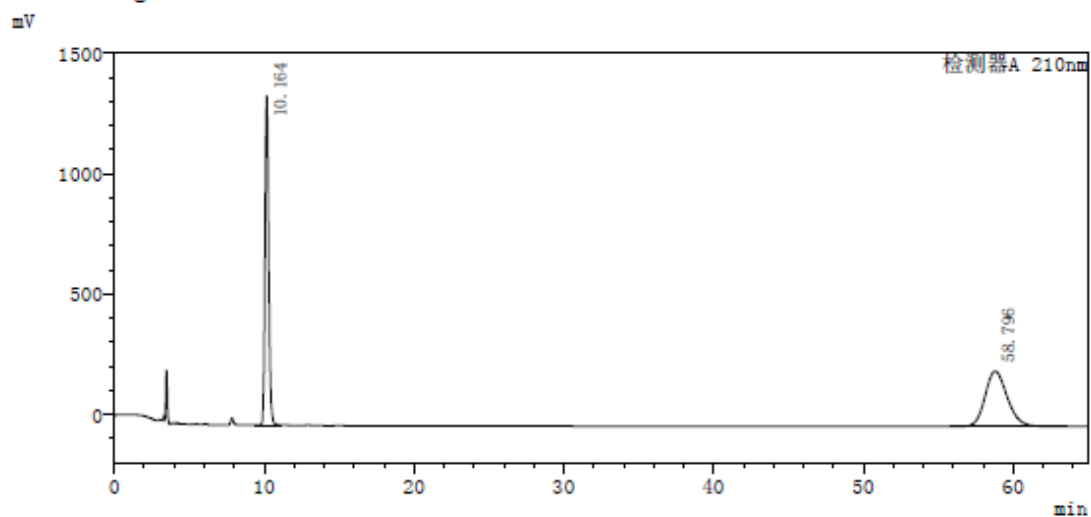

<Peak table>

检测器A 210nm

| Peak# | Ret. Time | Height  | Area     | Area%   |
|-------|-----------|---------|----------|---------|
| 1     | 10.164    | 1368883 | 23081489 | 49.423  |
| 2     | 58.796    | 229756  | 23620527 | 50.577  |
| 总计    |           | 1598639 | 46702016 | 100.000 |

<chromatogram>

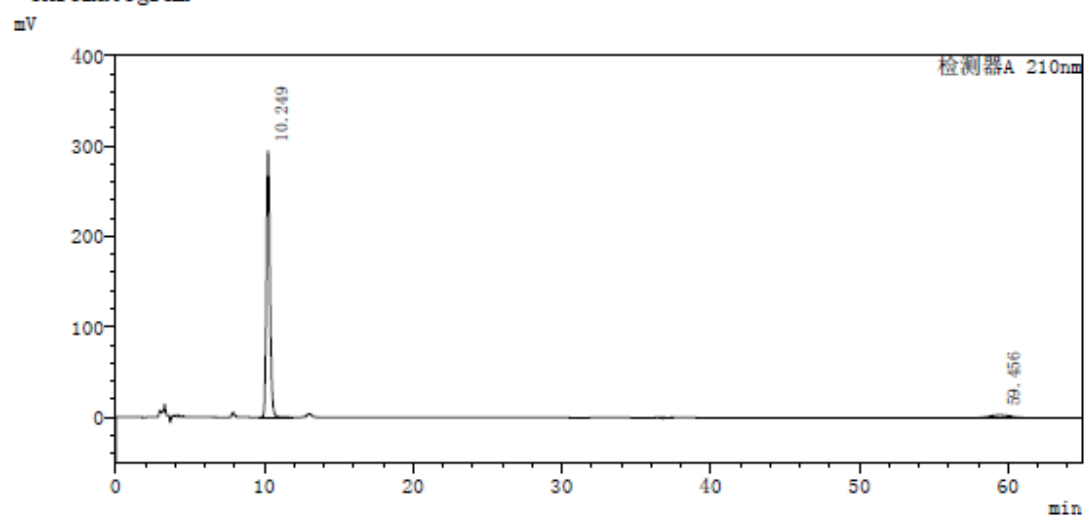

<Peak table>

检测器A 210nm

| Peak# | Ret. Time | Height | Area    | Area%   |
|-------|-----------|--------|---------|---------|
| 1     | 10.249    | 294945 | 4976116 | 94.820  |
| 2     | 59.456    | 2922   | 271856  | 5.180   |
| 总计    |           | 297867 | 5247972 | 100.000 |

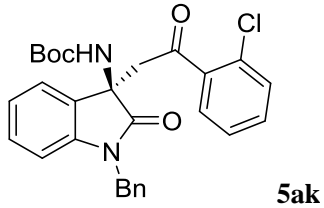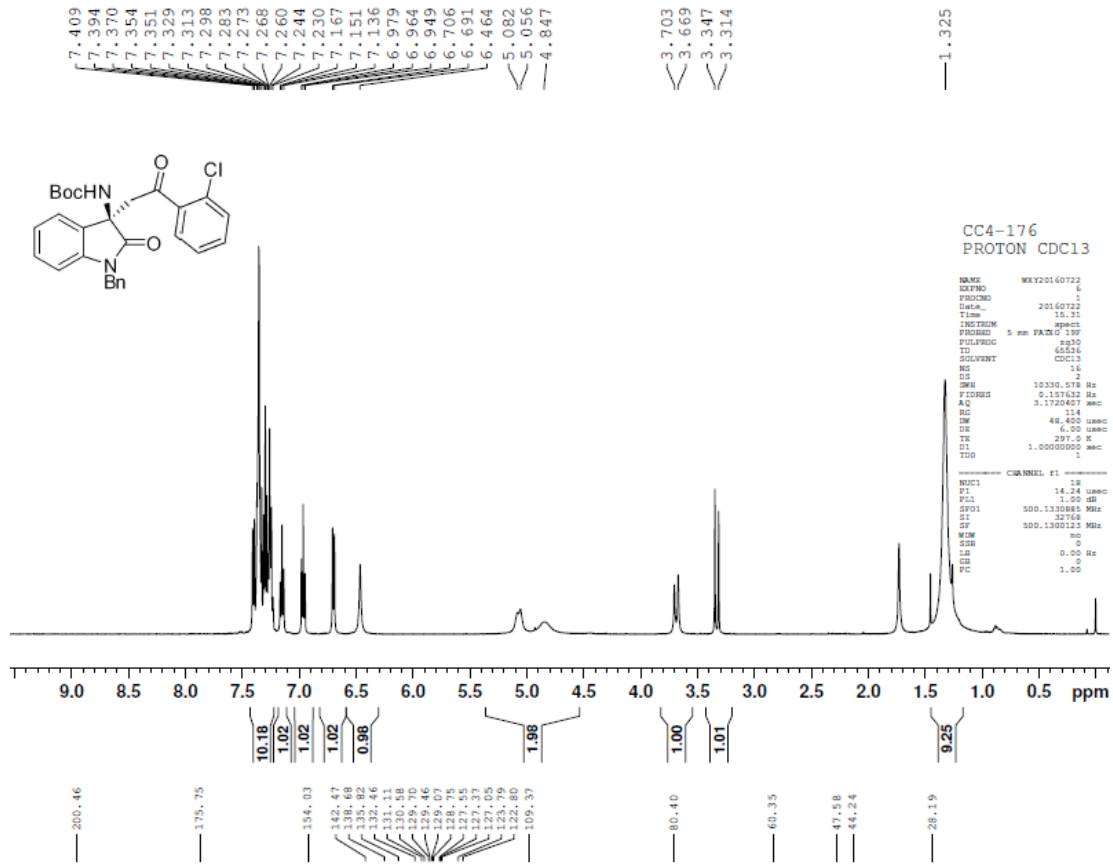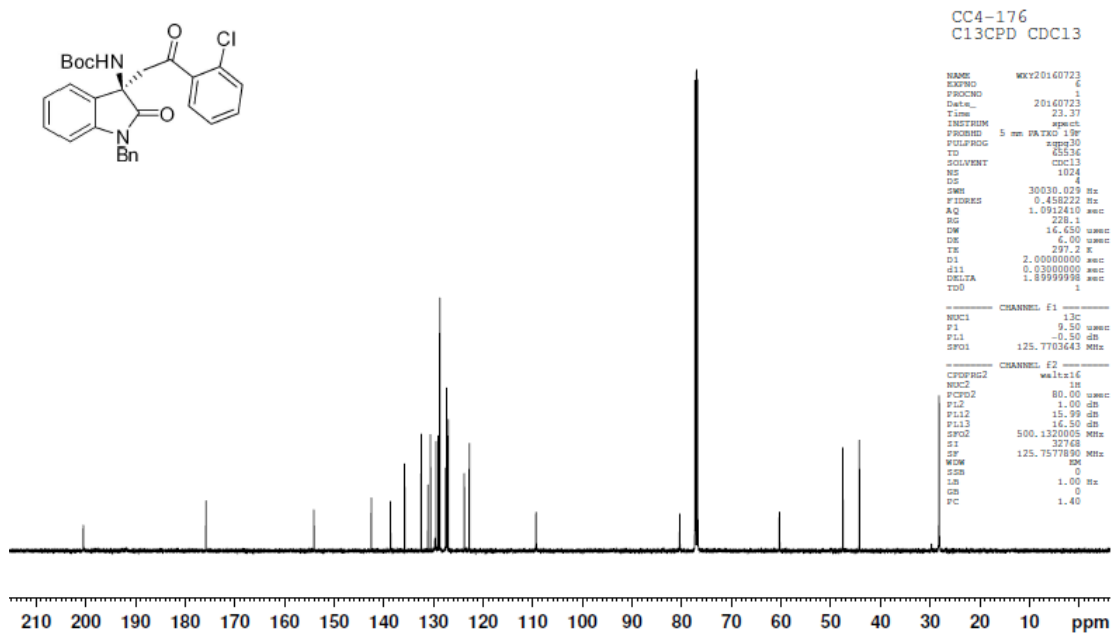

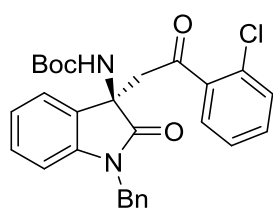

5ak

<chromatogram>

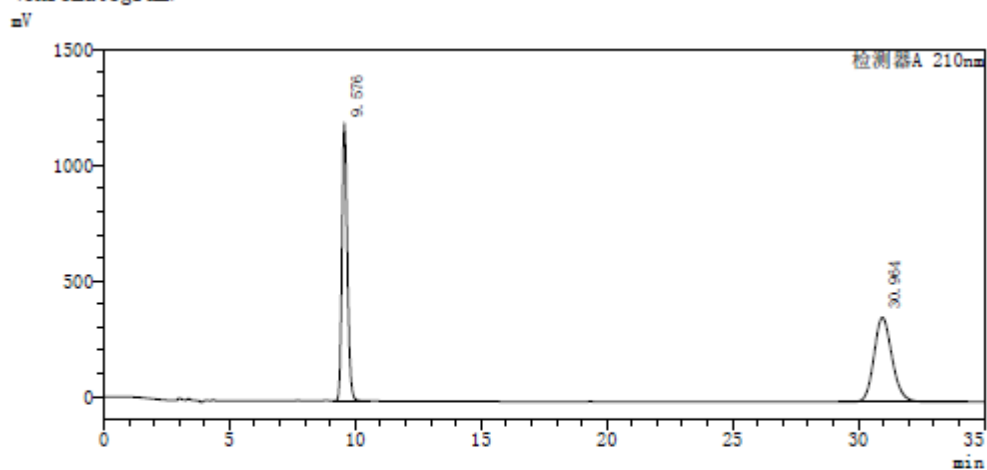

<Peak table>

检测器A 210nm

| Peak# | Ret. Time | Height  | Area     | Area%   |
|-------|-----------|---------|----------|---------|
| 1     | 9.576     | 1194871 | 17902612 | 49.545  |
| 2     | 30.964    | 364350  | 18231493 | 50.455  |
| 总计    |           | 1559221 | 36134104 | 100.000 |

<chromatogram>

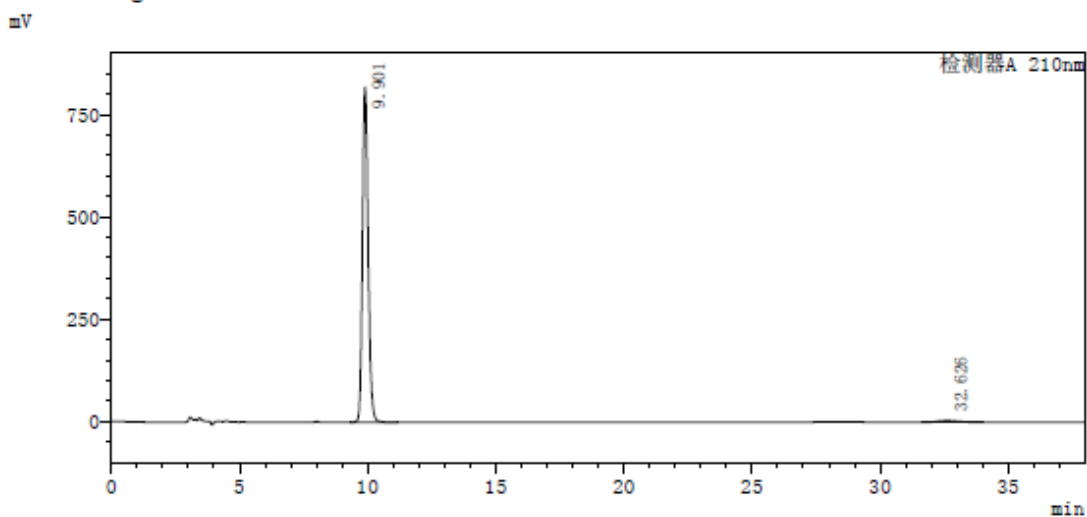

<Peak table>

检测器A 210nm

| Peak# | Ret. Time | Height | Area     | Area%   |
|-------|-----------|--------|----------|---------|
| 1     | 9.901     | 819318 | 12684369 | 98.382  |
| 2     | 32.626    | 4062   | 208592   | 1.618   |
| 总计    |           | 823380 | 12892961 | 100.000 |



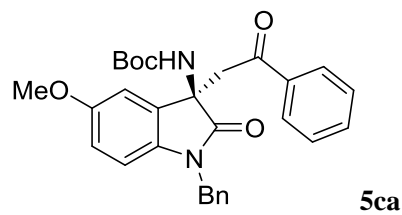

<chromatogram>

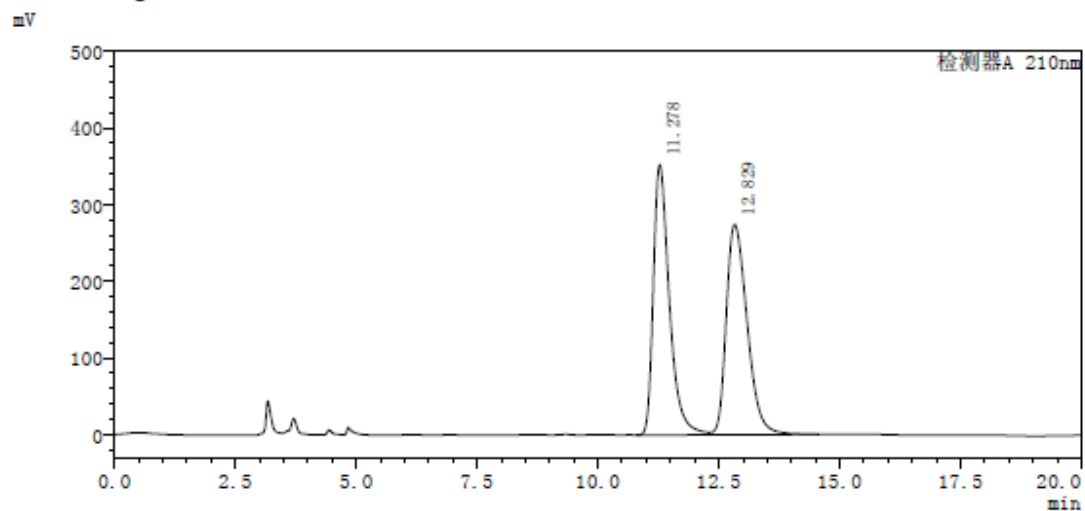

<Peak table>

检测器A 210nm

| Peak# | Ret. Time | Height | Area     | Area%   |
|-------|-----------|--------|----------|---------|
| 1     | 11.278    | 352459 | 8163165  | 49.687  |
| 2     | 12.829    | 274260 | 8265881  | 50.313  |
| 总计    |           | 626719 | 16429046 | 100.000 |

<chromatogram>

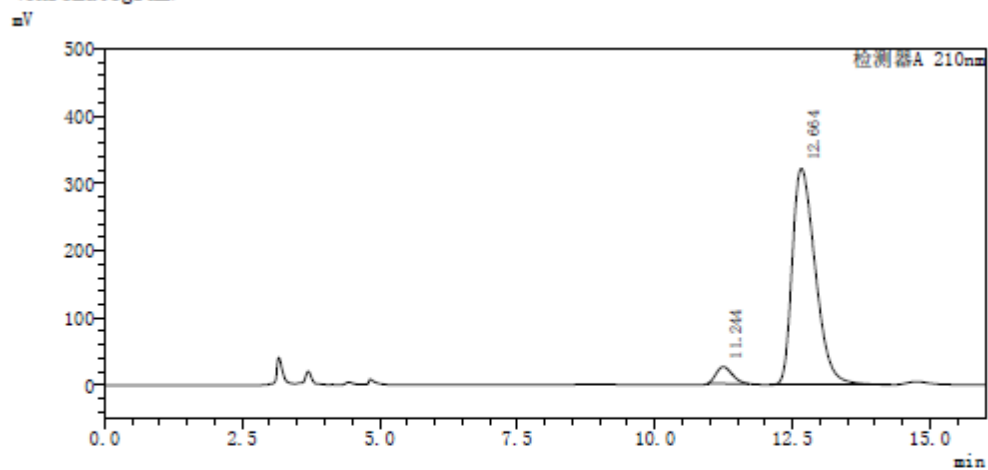

<Peak table>

检测器A 210nm

| Peak# | Ret. Time | Height | Area    | Area%   |
|-------|-----------|--------|---------|---------|
| 1     | 11.244    | 25066  | 509163  | 5.133   |
| 2     | 12.664    | 321693 | 9410646 | 94.867  |
| 总计    |           | 346760 | 9919809 | 100.000 |

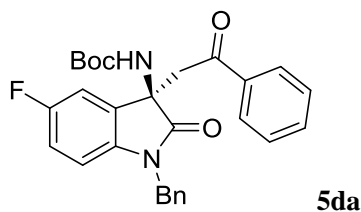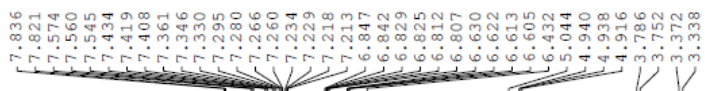

1.357

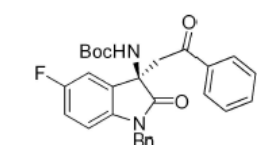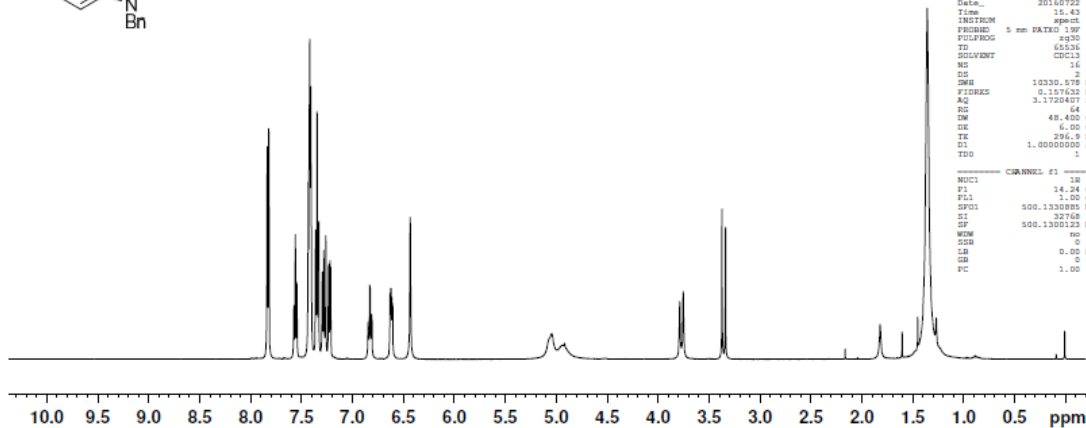

```

NAME      MXY20160722
EXPNO    2
PROCNO   1
Date_    20160722
Time     15.43
INSTRUM  spect
PROBHD   5 mm PATEO 1H
PULPROG  zgpg30
TD        65536
SOLVENT  CDCl3
NS        2
DS        2
SWH       10330.578 Hz
FIDRES   0.1517632 Hz
AQ        3.1720407 sec
RG        64
DM        48.400 um
DE        6.00 um
TE        296.2 K
SI        1.00000000 sec
TD0       1
----- CHANNEL f1 -----
NUC1      13C
P1        18.00 um
PL1       0.00 dB
SFO1      500.1330980 MHz
SI        32768
SF        500.1330980 MHz
WDW       EM
SSB       0
GB        0
PC        1.00
  
```

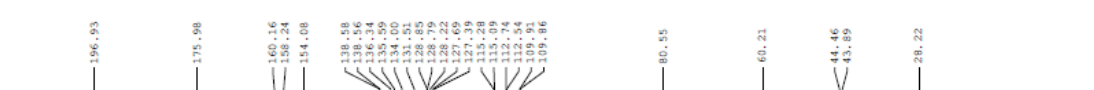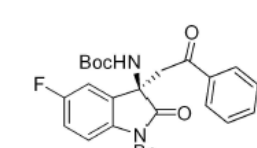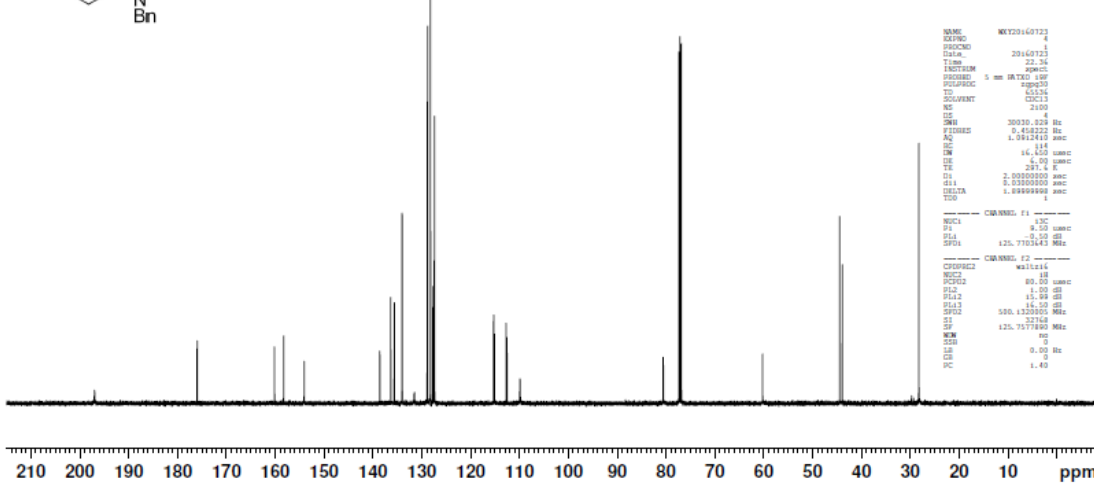

```

NAME      MXY20160722
EXPNO    4
PROCNO   1
Date_    20160722
Time     22.34
INSTRUM  spect
PROBHD   5 mm PATEO 1H
PULPROG  zgpg30
TD        65536
SOLVENT  CDCl3
NS        2
DS        2
SWH       30030.828 Hz
FIDRES   0.462232 Hz
AQ        1.391410 sec
RG        114
DM        16.400 um
DE        6.00 um
TE        296.2 K
SI        0.00000000 sec
d11      0.03000000 sec
DECTA    1.00000000 sec
TD0       1
----- CHANNEL f1 -----
NUC1      13C
P1        8.50 um
PL1       0.00 dB
SFO1      125.7603443 MHz
----- CHANNEL f2 -----
CPDPRG2  waltz16
NUC2      13C
P2        80.00 um
PL2       0.00 dB
SFO2      125.7603443 MHz
SI        15.00 dB
SF        500.1330980 MHz
WDW       EM
SSB       0
GB        0
PC        1.00
  
```



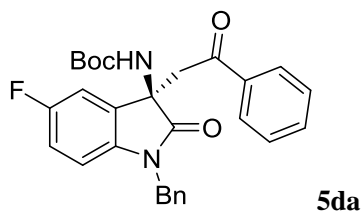

<chromatogram>

mV

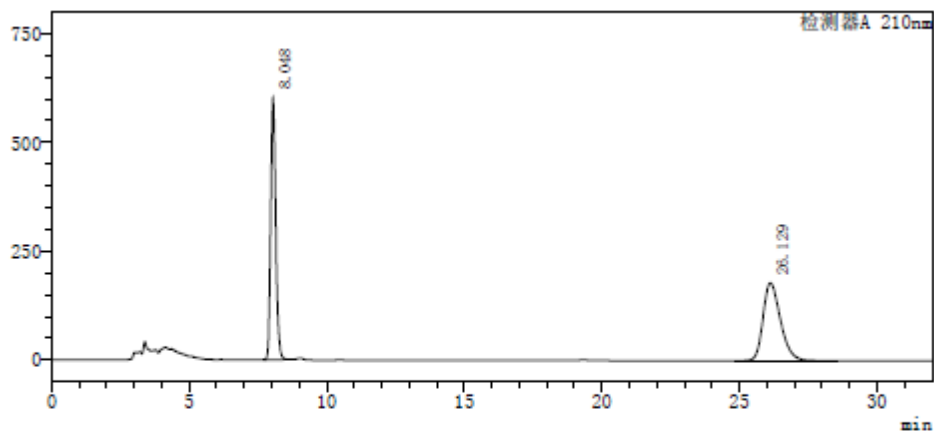

<Peak table>

检测器A 210nm

| Peak# | Ret. Time | Height | Area     | Area%   |
|-------|-----------|--------|----------|---------|
| 1     | 8.048     | 601429 | 7678463  | 49.434  |
| 2     | 26.129    | 178764 | 7854207  | 50.566  |
| 总计    |           | 780193 | 15532670 | 100.000 |

<chromatogram>

mV

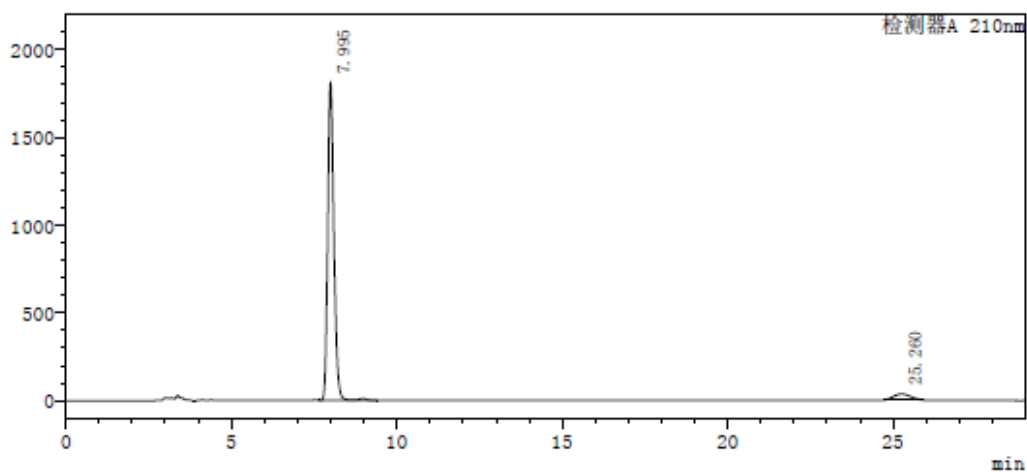

<Peak table>

检测器A 210nm

| Peak# | Ret. Time | Height  | Area     | Area%   |
|-------|-----------|---------|----------|---------|
| 1     | 7.995     | 1809478 | 23599713 | 94.984  |
| 2     | 25.260    | 34937   | 1246268  | 5.016   |
| 总计    |           | 1844415 | 24845981 | 100.000 |

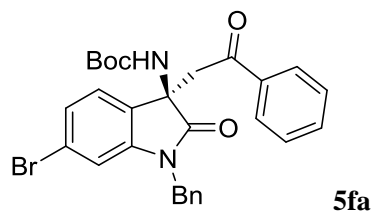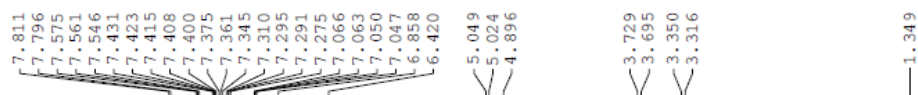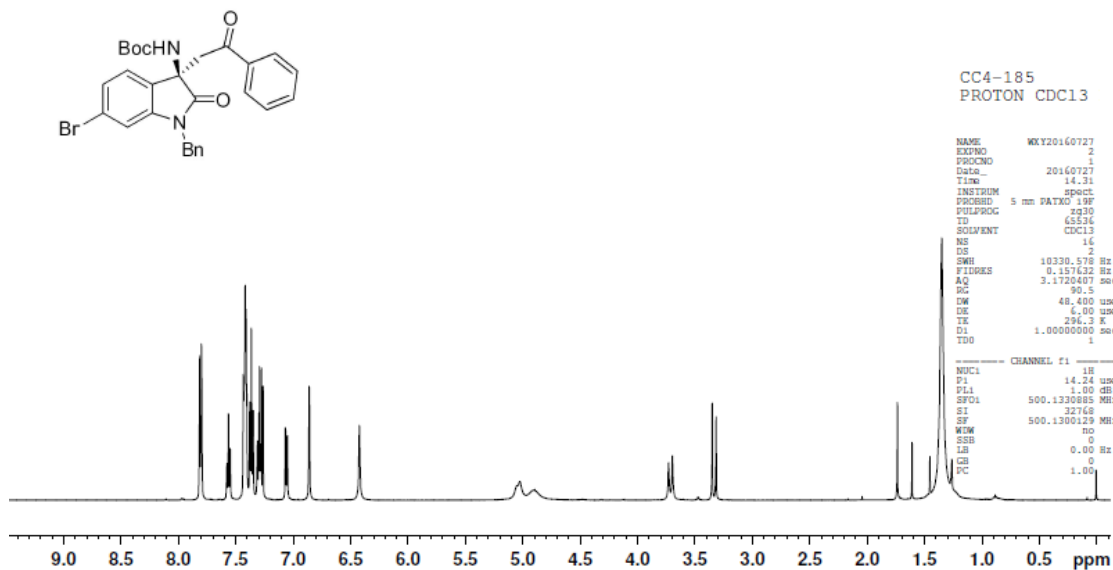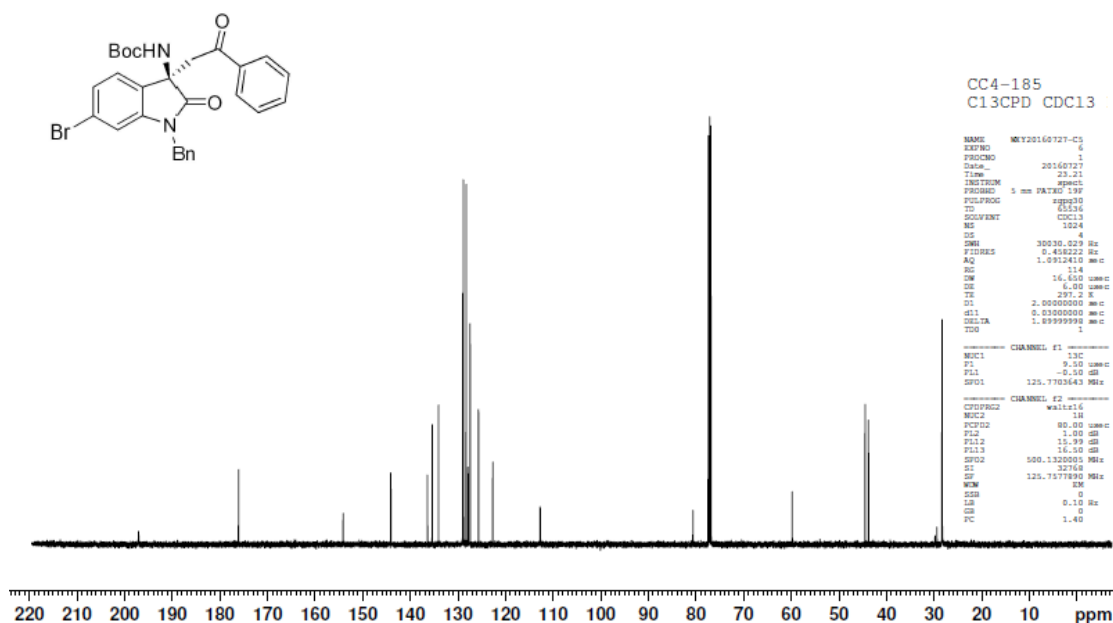

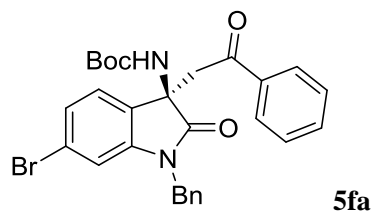

<chromatogram>

mV

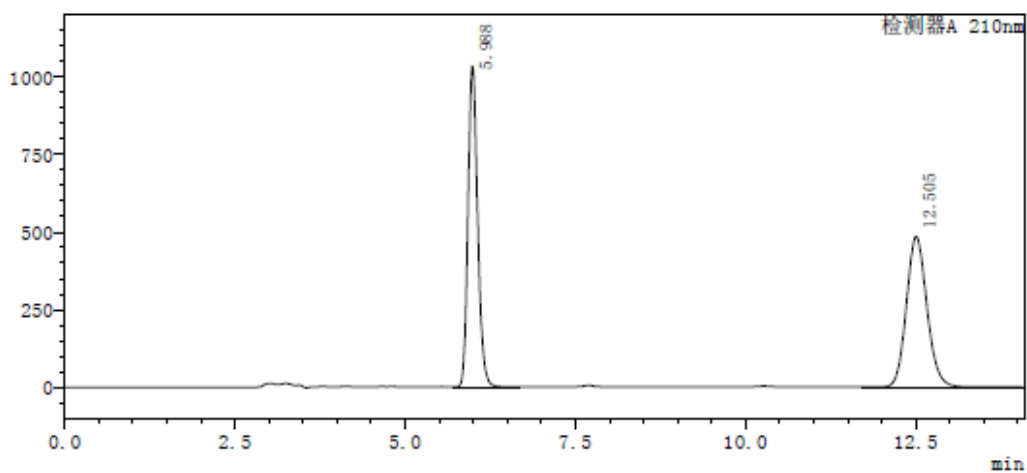

<Peak table>

检测器A 210nm

| Peak# | Ret. Time | Height  | Area     | Area%   |
|-------|-----------|---------|----------|---------|
| 1     | 5.988     | 1033692 | 10189869 | 49.994  |
| 2     | 12.505    | 484946  | 10192114 | 50.006  |
| 总计    |           | 1518638 | 20381983 | 100.000 |

<chromatogram>

mV

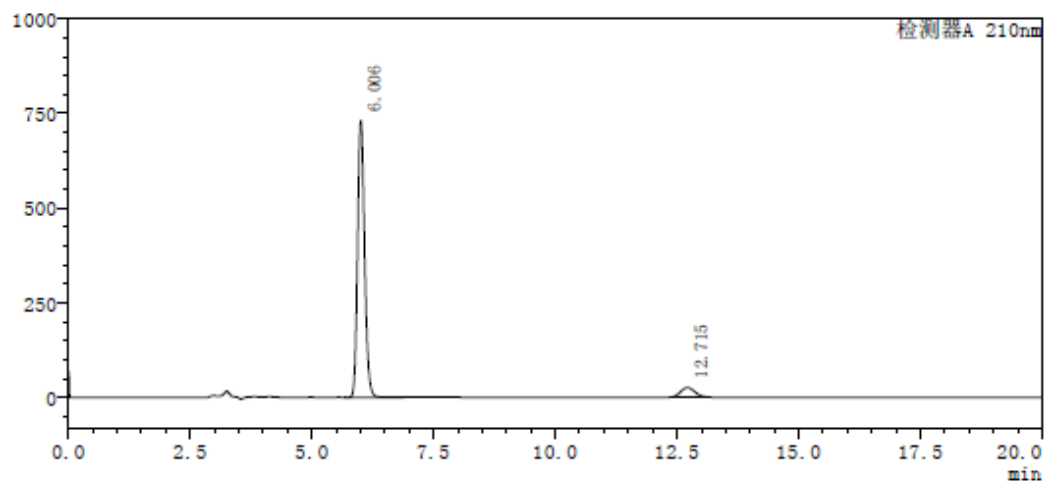

<Peak table>

检测器A 210nm

| Peak# | Ret. Time | Height | Area    | Area%   |
|-------|-----------|--------|---------|---------|
| 1     | 6.006     | 731510 | 7202183 | 93.505  |
| 2     | 12.715    | 25064  | 500315  | 6.495   |
| 总计    |           | 756574 | 7702498 | 100.000 |



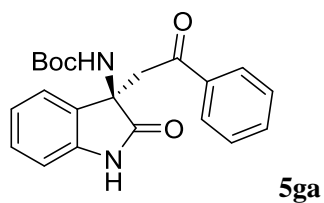

<chromatogram>

mV

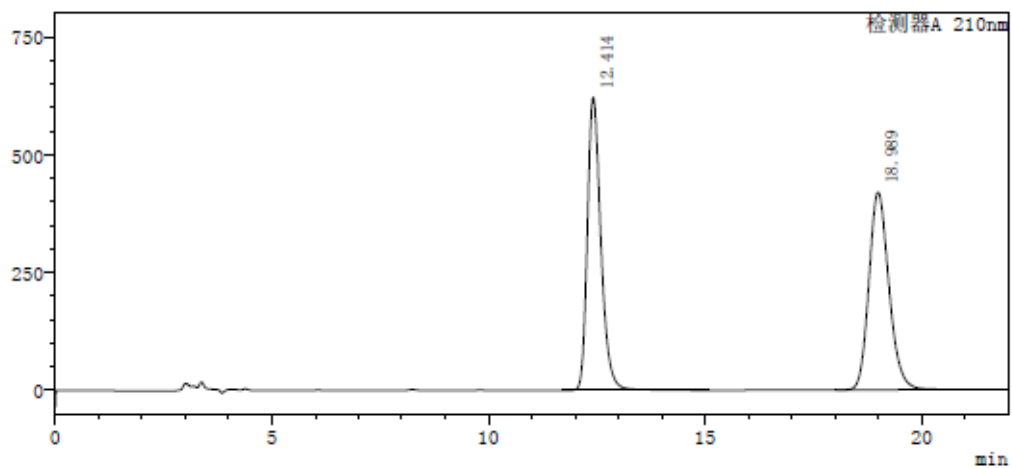

<Peak table>

检测器A 210nm

| Peak# | Ret. Time | Height  | Area     | Area%   |
|-------|-----------|---------|----------|---------|
| 1     | 12.414    | 621001  | 13446664 | 49.896  |
| 2     | 18.989    | 419266  | 13502587 | 50.104  |
| 总计    |           | 1040266 | 26949252 | 100.000 |

<chromatogram>

mV

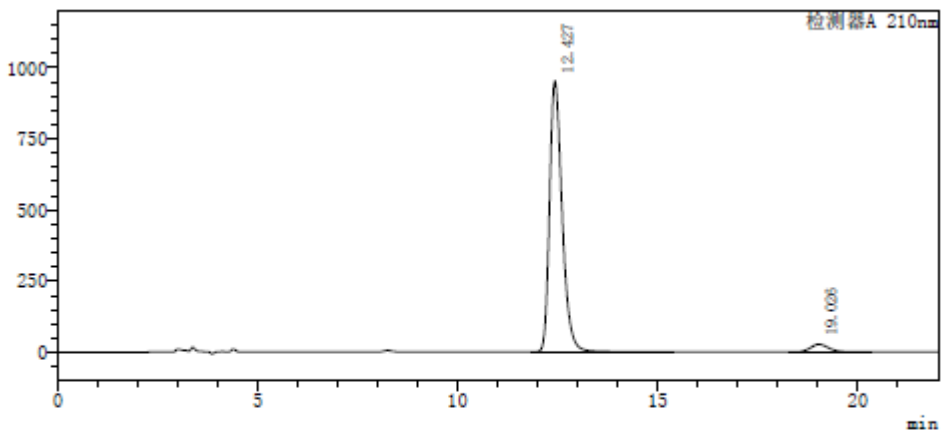

<Peak table>

检测器A 210nm

| Peak# | Ret. Time | Height | Area     | Area%   |
|-------|-----------|--------|----------|---------|
| 1     | 12.427    | 951272 | 20816113 | 96.143  |
| 2     | 19.026    | 26399  | 835166   | 3.857   |
| 总计    |           | 977672 | 21651279 | 100.000 |

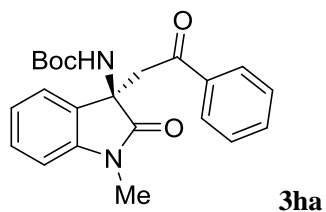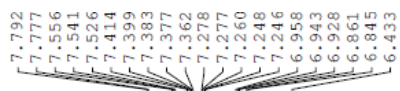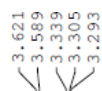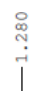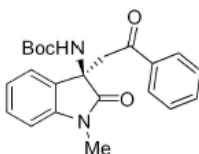

CC4-186  
 PROTON CDC13  
 NAME WXY20160727  
 EXPNO 3  
 PROCNO 1  
 Date\_ 20160727  
 TIME 14.37  
 INSTRUM spect  
 PROBHD 5 mm PAXCO 19F  
 PULPROG zg30  
 TO 65.26  
 SOLVENT CDC13  
 NS 16  
 DS 2  
 SWH 10330.578 Hz  
 FIDRES 0.157432 Hz  
 AQ 3.1720407 sec  
 RG 203.2  
 FM 48.400 usec  
 DE 6.00 usec  
 TE 296.2 K  
 D1 1.00000000 sec  
 TDO 1  
 CHANNEL F1 -----  
 NUC1 1H  
 P1 14.24 usec  
 PL1 1.00 dB  
 SFO1 500.130085 MHz  
 S1 32768  
 SF 500.1300129 MHz  
 KW no  
 SSB 0  
 LB 0.00 Hz  
 GB 0  
 PC 1.00

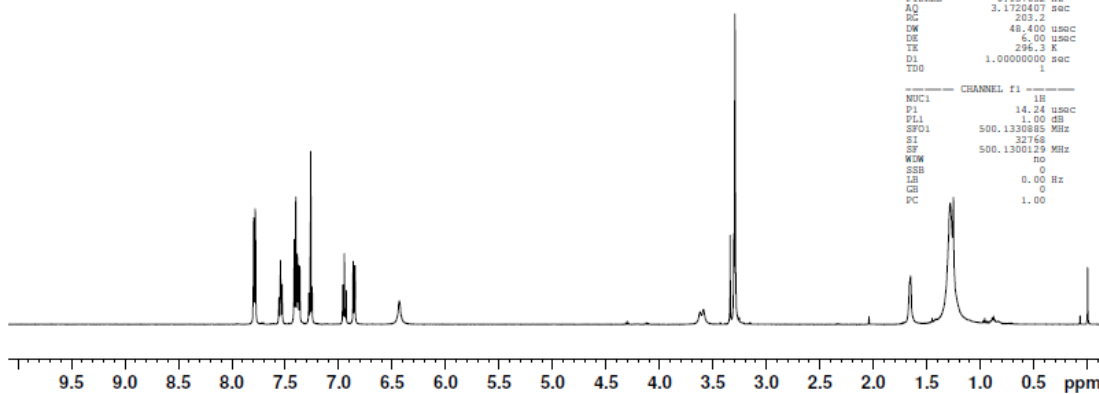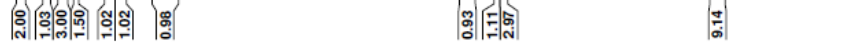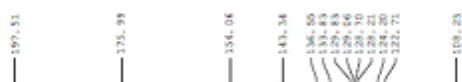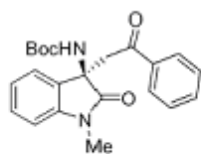

CC4-186  
 C13CPD CDC13

NAME WXY20160727-C3  
 EXPNO 10  
 PROCNO 1  
 Date\_ 20160728  
 TIME 18.22  
 INSTRUM spect  
 PROBHD 5 mm PAXCO 19F  
 PULPROG zgpg30  
 TO 65.26  
 SOLVENT CDC13  
 NS 1624  
 DS 4  
 SWH 30033.029 Hz  
 FIDRES 0.646222 Hz  
 AQ 1.9312416 sec  
 RG 114  
 FM 14.456 usec  
 DE 4.00 usec  
 TE 297.2 K  
 D1 2.00000000 sec  
 d11 0.00000000 sec  
 DELTA 1.99999999 sec  
 TDO 1

CHANNEL F1 -----  
 NUC1 13C  
 P1 9.50 usec  
 PL1 0.50 dB  
 SFO1 125.7703143 MHz  
 CHANNEL F2 -----  
 C13PFG2 waltz16  
 NUC2 1H  
 P2 80.00 usec  
 PL2 1.00 dB  
 PL1.2 14.99 dB  
 PL2.2 14.50 dB  
 SFO2 500.1300003 MHz  
 S1 32768  
 SF 125.7577810 MHz  
 KW no  
 SSB 0  
 LB 0.00 Hz  
 GB 0  
 PC 0.00

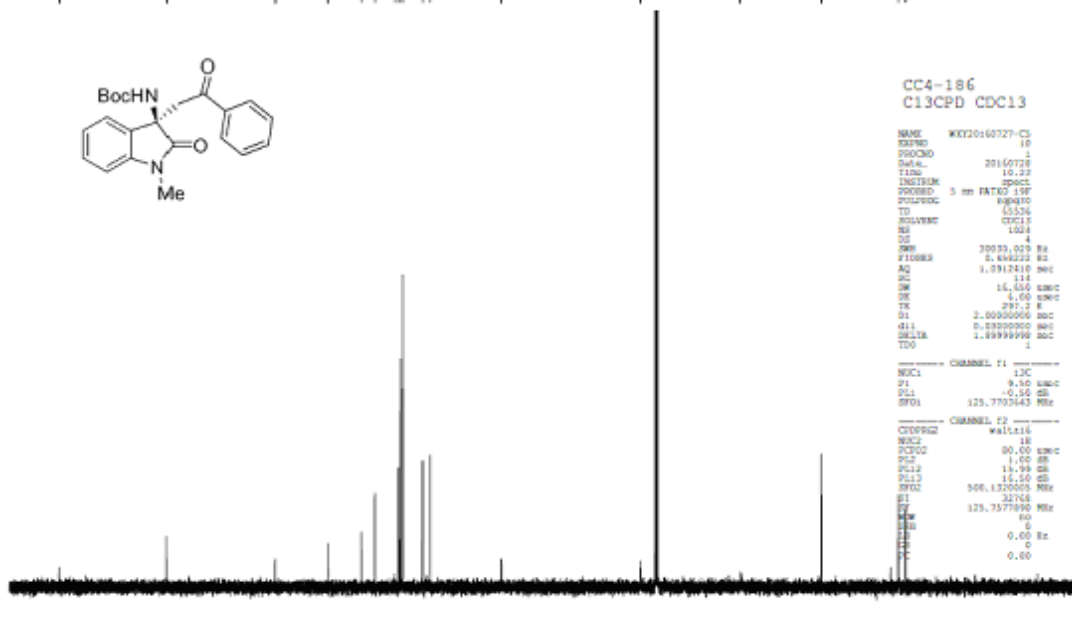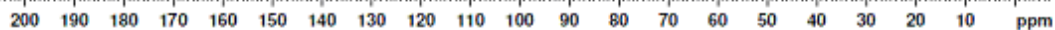

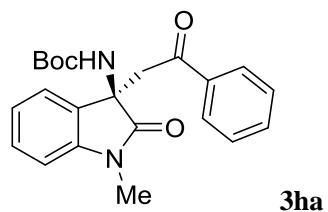

<chromatogram>

mV

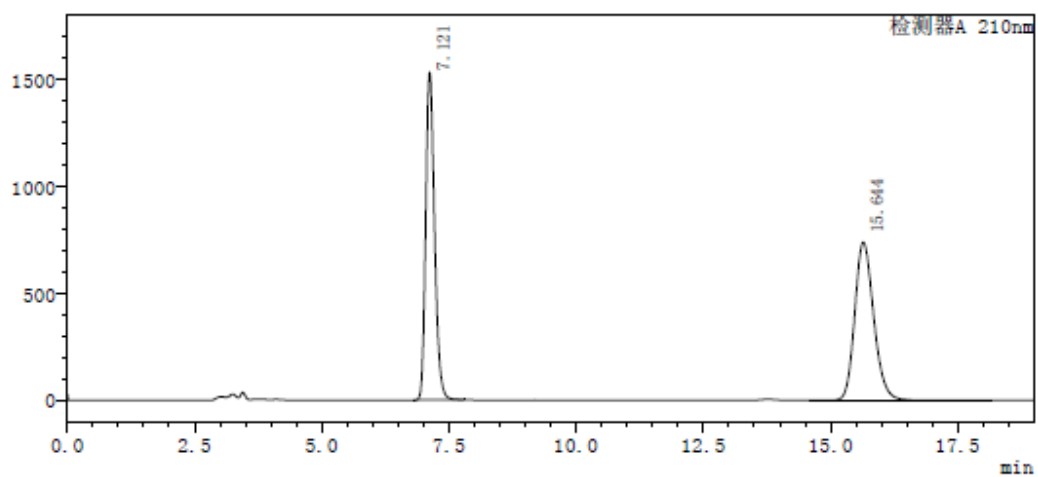

<Peak table>

检测器A 210nm

| Peak# | Ret. Time | Height  | Area     | Area%   |
|-------|-----------|---------|----------|---------|
| 1     | 7.121     | 1531986 | 18475860 | 49.077  |
| 2     | 15.644    | 739493  | 19170500 | 50.923  |
| 总计    |           | 2271479 | 37646360 | 100.000 |

<chromatogram>

mV

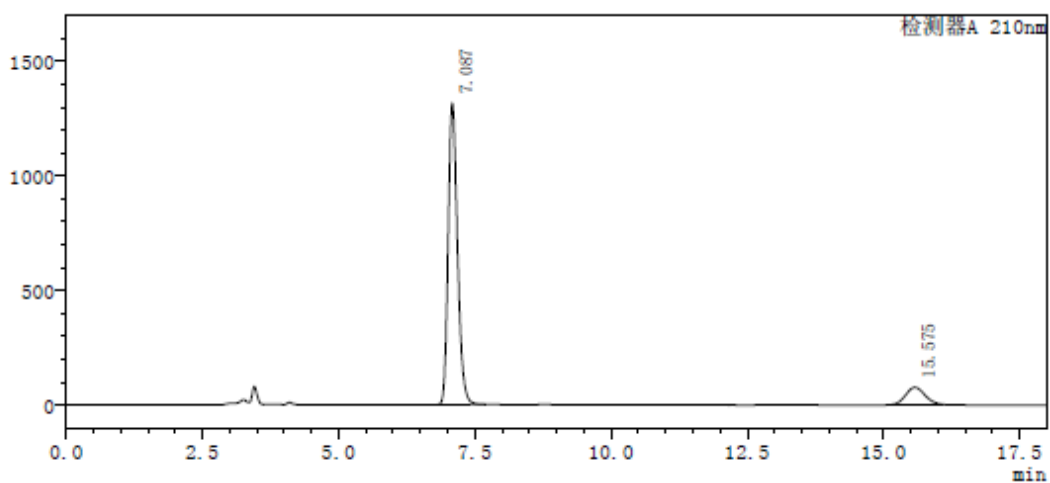

<Peak table>

检测器A 210nm

| Peak# | Ret. Time | Height  | Area     | Area%   |
|-------|-----------|---------|----------|---------|
| 1     | 7.087     | 1315514 | 15618677 | 89.737  |
| 2     | 15.575    | 74209   | 1786302  | 10.263  |
| 总计    |           | 1389723 | 17404979 | 100.000 |

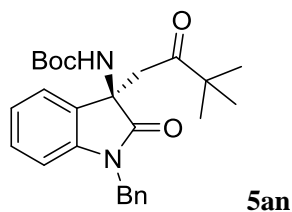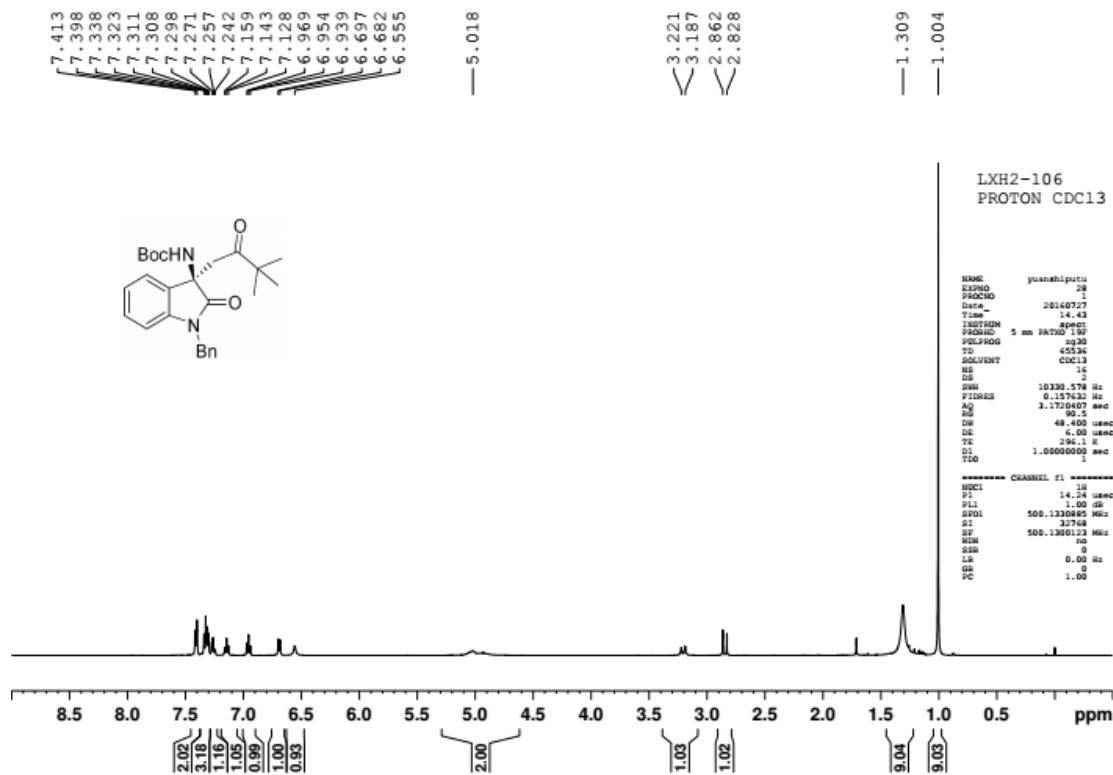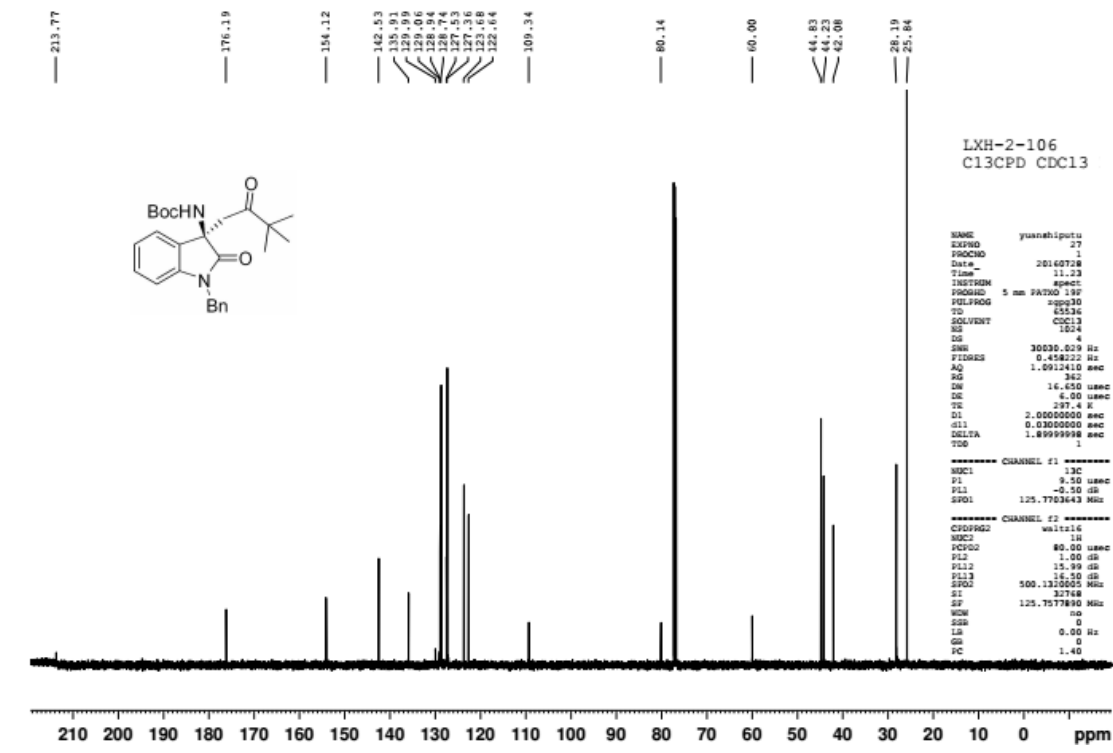



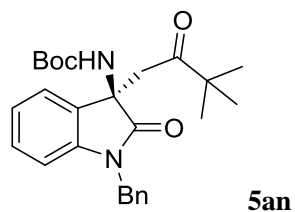

<chromatogram>

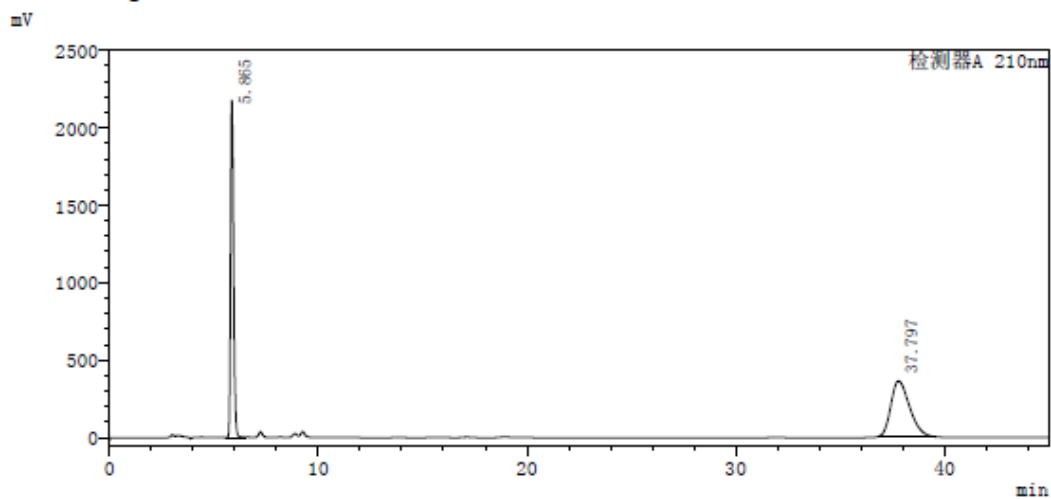

<Peak table>

检测器A 210nm

| Peak# | Ret. Time | Height  | Area     | Area%   |
|-------|-----------|---------|----------|---------|
| 1     | 5.865     | 2180014 | 21598833 | 49.410  |
| 2     | 37.797    | 357991  | 22114877 | 50.590  |
| 总计    |           | 2538005 | 43713710 | 100.000 |

<chromatogram>

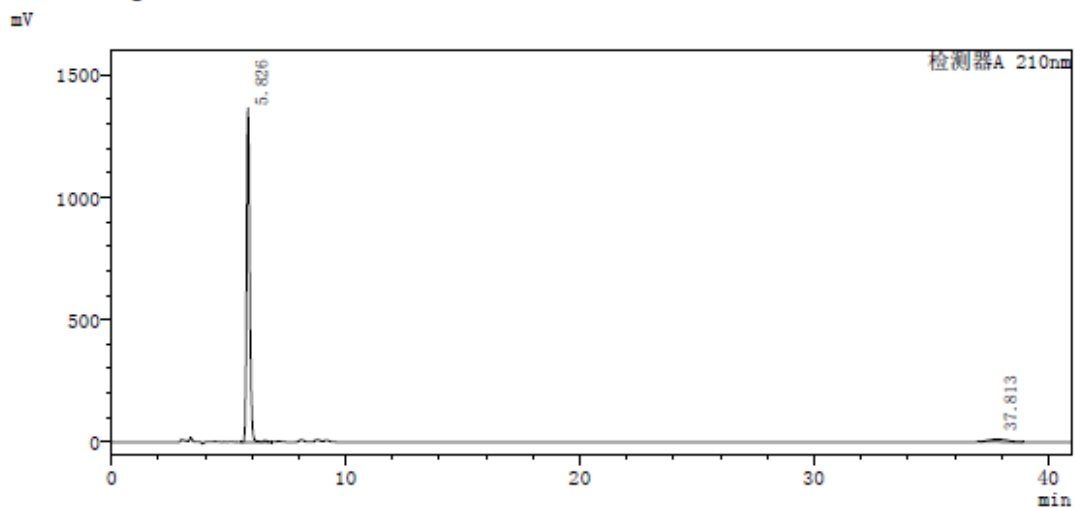

<Peak table>

检测器A 210nm

| Peak# | Ret. Time | Height  | Area     | Area%   |
|-------|-----------|---------|----------|---------|
| 1     | 5.826     | 1367738 | 13048340 | 95.226  |
| 2     | 37.813    | 11418   | 654220   | 4.774   |
| 总计    |           | 1379155 | 13702560 | 100.000 |

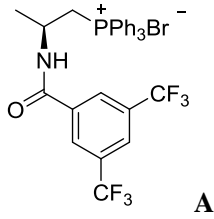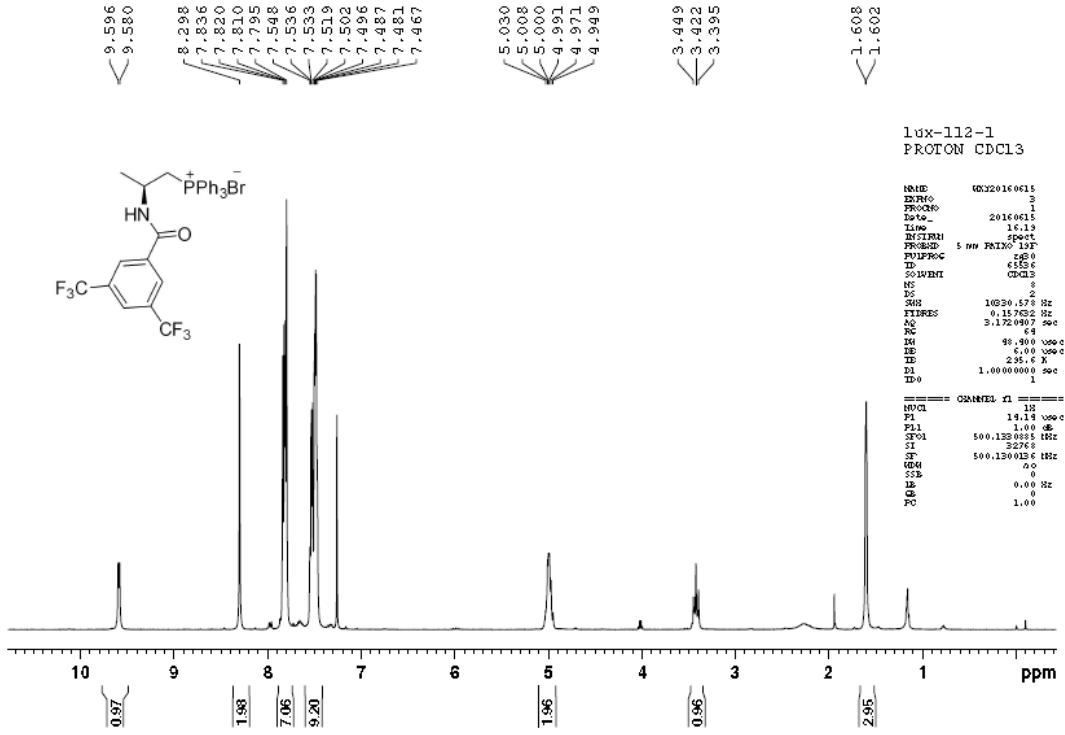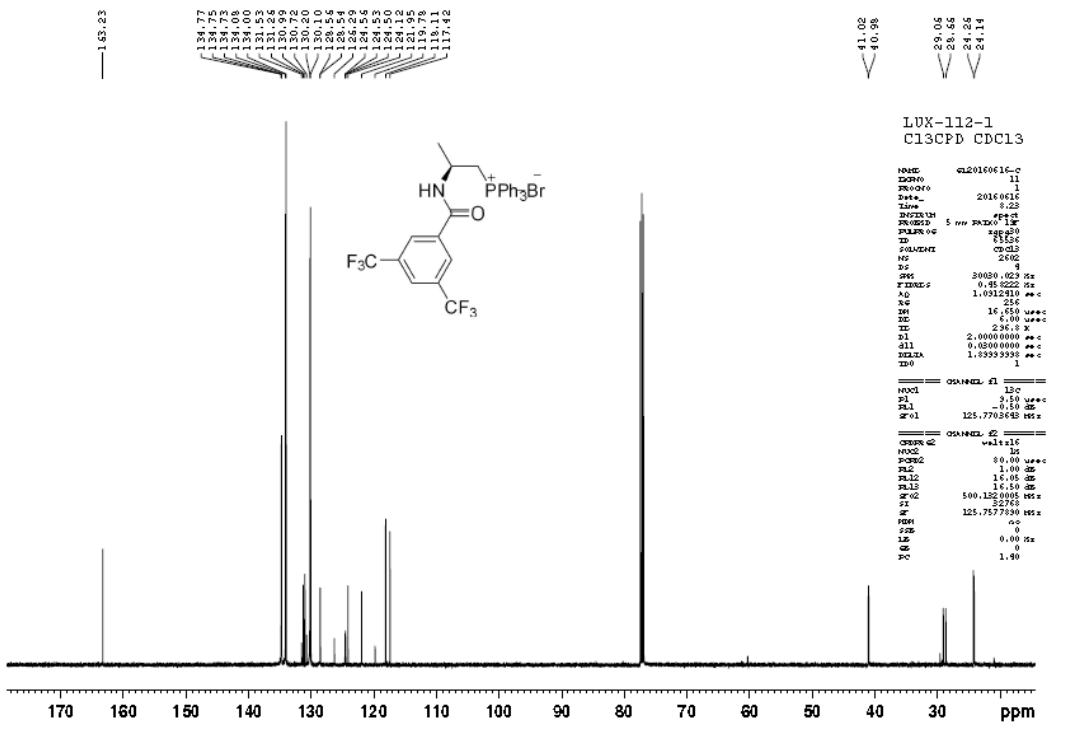

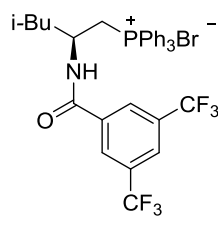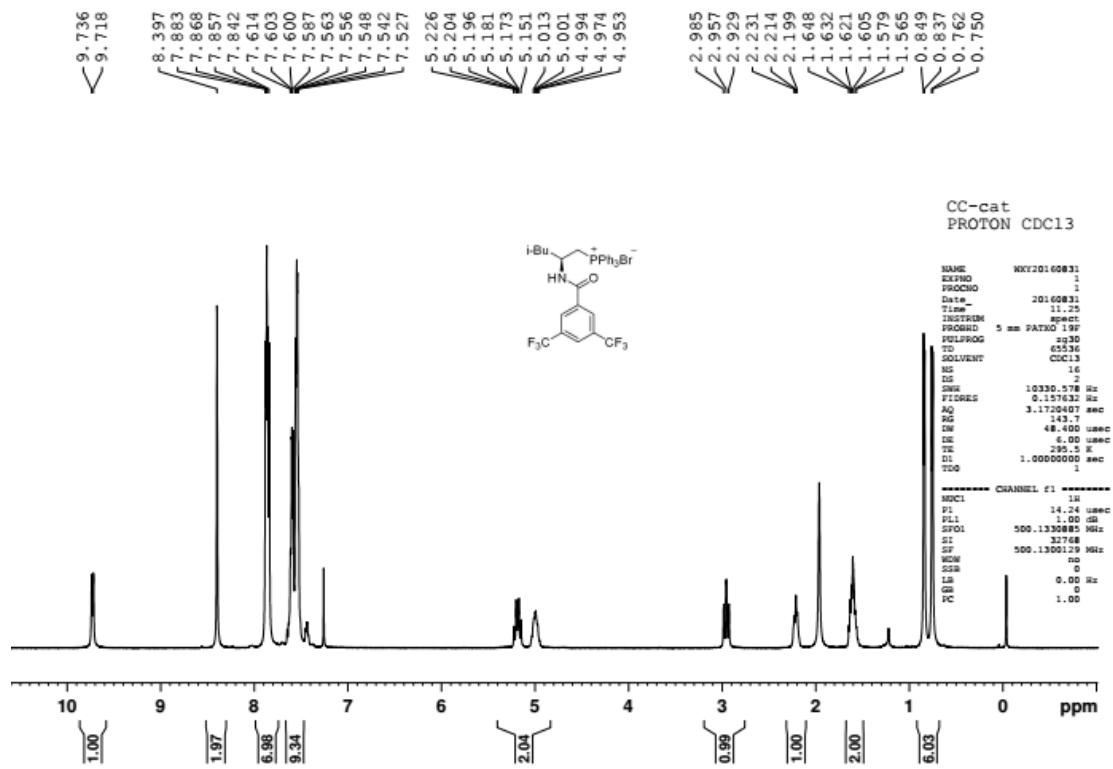

CC-cat  
PROTON CDCl3

```

NAME      WXYZ0160831
EXPNO    1
PROCNO    1
Date_    20160831
Time     11.23
INSTRUM  spect
PROBHD   5 mm PABBO 150
PULPROG  zg30
TD        65536
SOLVENT  CDCl3
NS        16
DS        2
SWH       10330.578 Hz
FIDRES    0.157632 Hz
AQ        3.1726407 sec
RG        143.7
IN        48.400 usec
DE        6.00 usec
TE        295.5 K
SI        1.00000000 sec
TOD       1
----- CHANNEL f1 -----
NUC1      1H
P1        14.24 usec
PL1       0.00 dB
SFO1      500.1330885 MHz
SI        32768
SF        500.1330129 MHz
WDW       no
SSB       no
LB        0.00 Hz
GB        0
PC        1.00
  
```

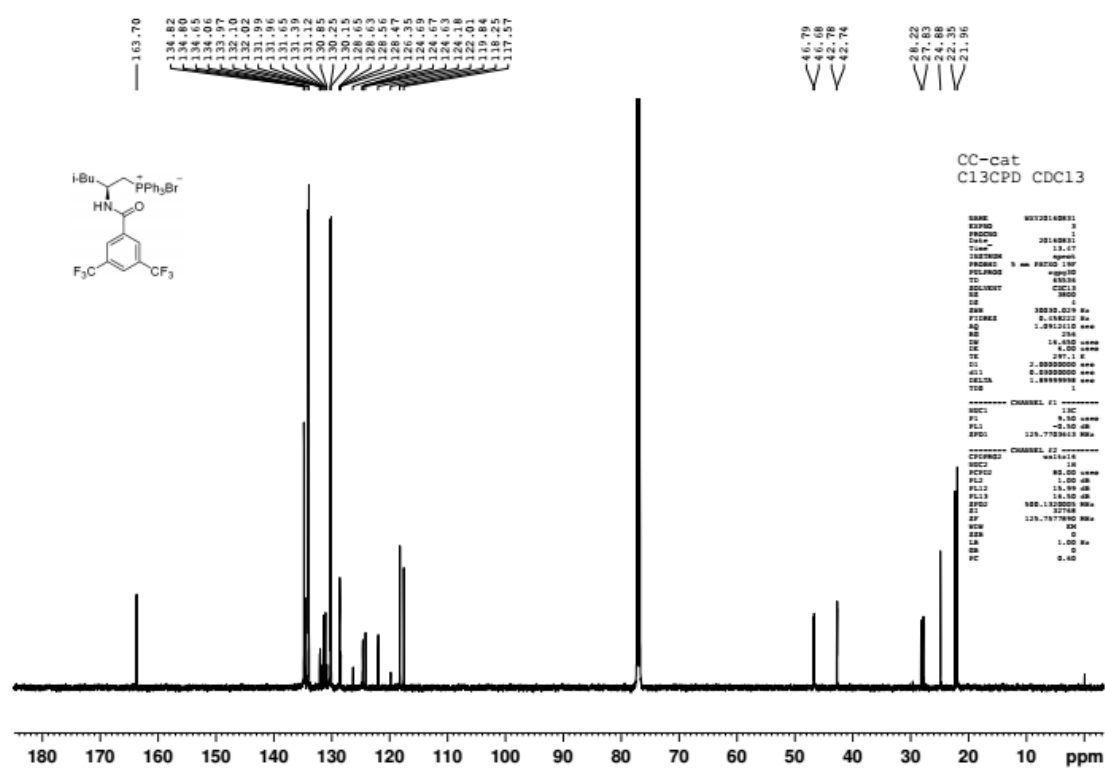

CC-cat  
C13CPD CDCl3

```

NAME      WXYZ0160831
EXPNO    2
PROCNO    1
Date_    20160831
Time     13.47
INSTRUM  spect
PROBHD   5 mm PABBO 150
PULPROG  zgpg30
TD        65536
SOLVENT  CDCl3
NS        16
DS        2
SWH       10330.578 Hz
FIDRES    0.157632 Hz
AQ        3.1726407 sec
RG        143.7
IN        48.400 usec
DE        6.00 usec
TE        295.5 K
SI        1.00000000 sec
TOD       1
----- CHANNEL f1 -----
NUC1      13C
P1        8.00 usec
PL1       -9.00 dB
SFO1      125.7678813 MHz
----- CHANNEL f2 -----
CPDPRG2  waltz16
NUC2      1H
P2        80.00 usec
PL2       1.00 dB
PL12     19.99 dB
PL13     14.30 dB
SFO2      500.1330885 MHz
SI        32768
SF        125.7678813 MHz
WDW       no
SSB       no
LB        1.00 Hz
GB        0
PC        0.40
  
```

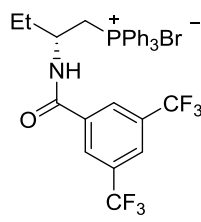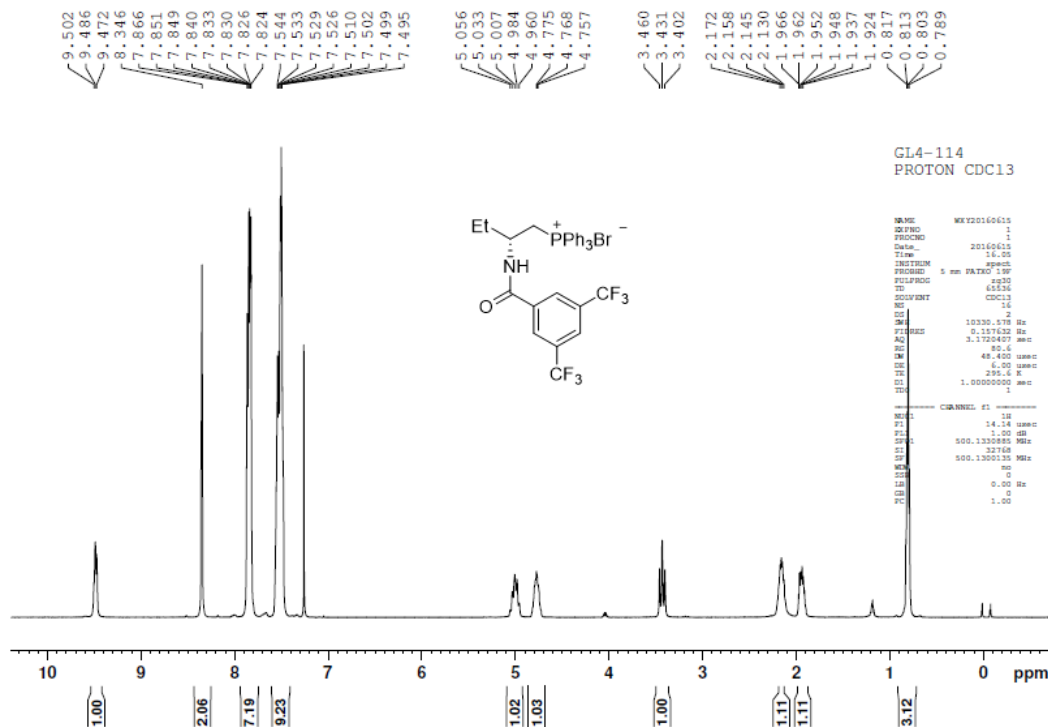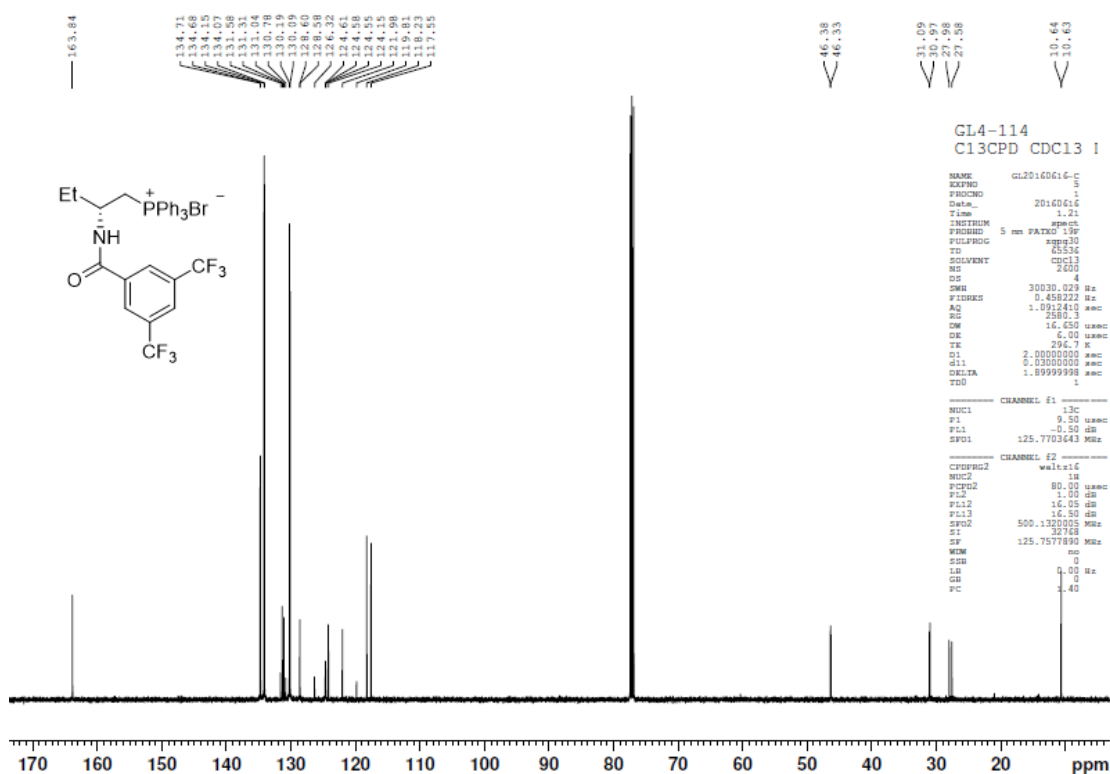



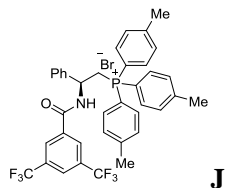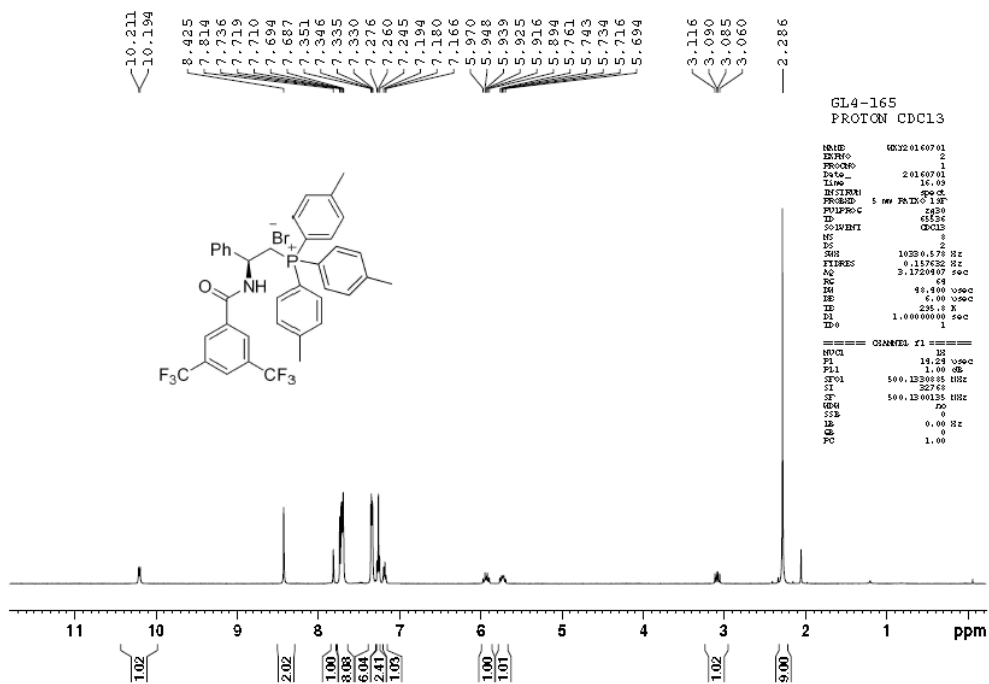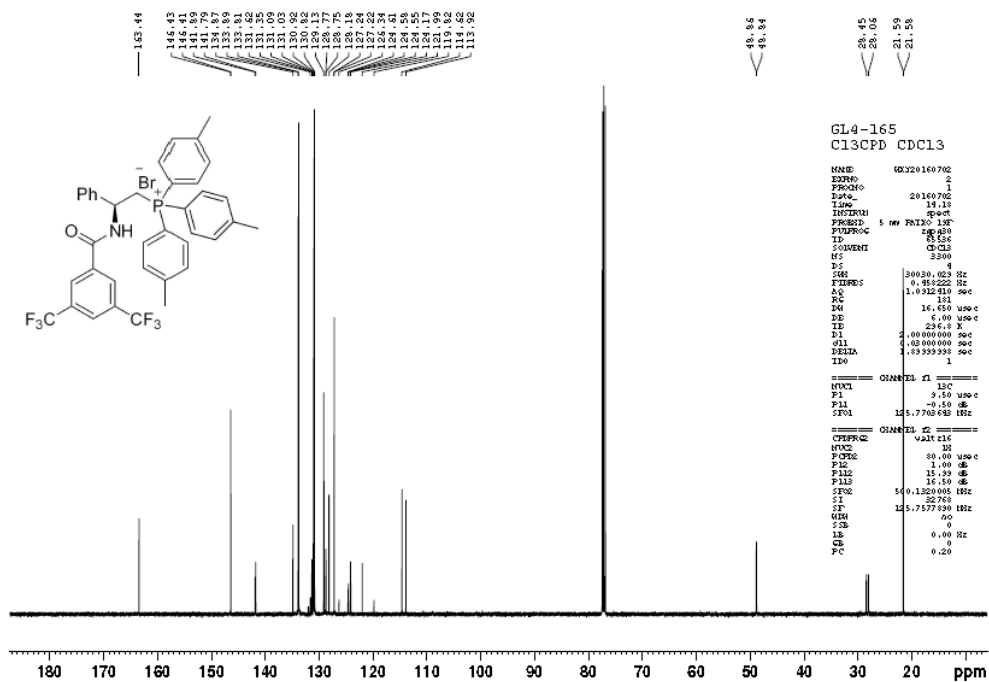

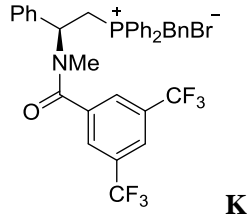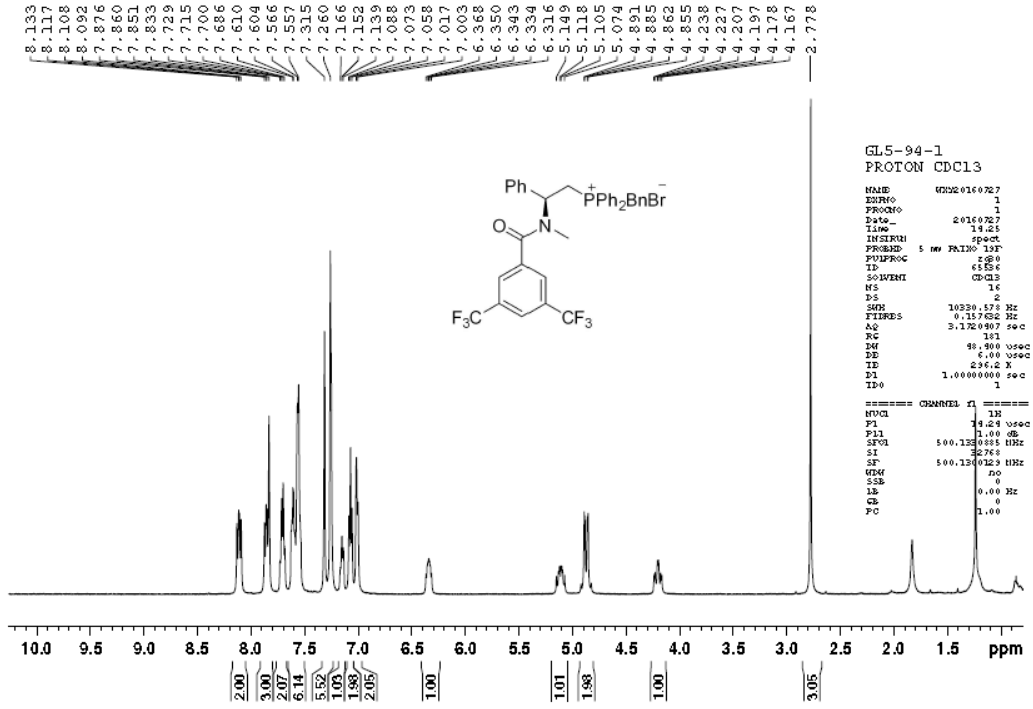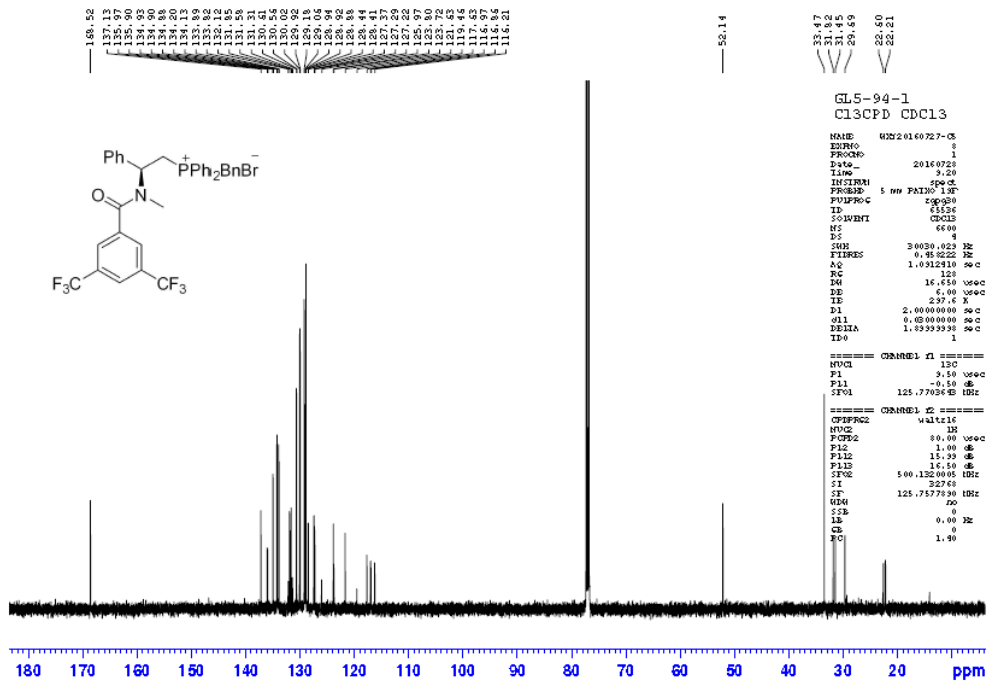

Supplement: c6qo00546b1.pdf [file c6qo00546b1.pdf]
